# Supplementary material for: Induction of fibroblast senescence generates a non-fibrogenic myofibroblast phenotype that differentially impacts on cancer prognosis
Source: Aging (Albany NY). 2016 Dec 15;9(1):114–31. doi: 10.18632/aging.101127 (PMC5310659; doi:10.18632/aging.101127)
Supplement: Supplementary file 2 [file aging-09-0114-s002.xlsx]

## Sheet: ct_tgf.tags1
	logFC	logCPM	LR	PValue	FDR
LTBP2	2.37482	7.68142	829.924	1.68e-182	2.2e-178
LRRC15	2.38253	5.58821	511.796	2.58e-113	1.69e-109
EGR2	4.89984	2.50089	450.39	5.93e-100	2.59e-96
ELN	3.98011	4.77783	435.357	1.11e-96	3.63e-93
TGFBI	1.44168	9.4656	431.962	6.08e-96	1.59e-92
COL11A1	2.11888	5.5903	410.69	2.59e-91	5.66e-88
THBS2	1.47744	8.82183	379.211	1.85e-84	3.46e-81
FN1	1.45789	14.4227	362.345	8.69e-81	1.42e-77
NTM	2.29455	5.21999	352.703	1.09e-78	1.5e-75
COMP	4.82928	2.58314	352.613	1.14e-78	1.5e-75
COL4A1	1.46906	9.93716	351.742	1.77e-78	2.11e-75
TMTC1	-1.53624	7.49202	332.72	2.46e-74	2.68e-71
AMIGO2	2.06968	6.24243	324.255	1.71e-72	1.73e-69
INHBA	1.94844	5.2933	322.227	4.74e-72	4.43e-69
CDH2	1.73168	6.90464	321.523	6.75e-72	5.89e-69
MMP2	1.2934	10.6718	302.006	1.2e-67	9.86e-65
APCDD1L	2.10814	3.97169	290.468	3.93e-65	3.03e-62
NREP	1.90216	7.54383	286.178	3.38e-64	2.46e-61
TGFBR3	-1.45923	5.69647	266.693	5.96e-60	4.11e-57
CTSC	-1.39697	8.67573	265.413	1.13e-59	7.43e-57
CSGALNACT1	-1.6585	6.0504	259.746	1.95e-58	1.22e-55
TNFRSF11B	-1.2029	10.3574	256.648	9.23e-58	5.49e-55
FGF7	-1.43399	5.7366	246.781	1.31e-55	7.44e-53
SFRP1	-2.05217	10.1832	245.031	3.15e-55	1.72e-52
ADAMTS1	-1.46944	8.05495	244.547	4.01e-55	2.1e-52
IL1R1	-1.48715	7.65289	244.124	4.96e-55	2.5e-52
NUAK1	1.71377	5.29812	242.527	1.11e-54	5.36e-52
PDGFD	-1.72685	5.4375	240.629	2.87e-54	1.34e-51
ADM2	1.67974	4.00385	238.5	8.35e-54	3.77e-51
STC1	-1.23989	7.69901	236.6	2.17e-53	9.46e-51
CYP7B1	-1.26251	6.44145	235.516	3.74e-53	1.58e-50
LEPR	-1.56553	5.88042	234.502	6.22e-53	2.54e-50
TRPA1	-1.32823	5.78629	233.654	9.52e-53	3.78e-50
RAB27B	-1.50269	5.62463	229.939	6.15e-52	2.37e-49
ITGA11	1.3001	7.93639	225.96	4.53e-51	1.7e-48
POSTN	3.88725	8.31157	219.587	1.11e-49	4.05e-47
PTGS2	-1.26619	8.20537	216.126	6.33e-49	2.24e-46
STOM	-0.988167	8.57057	214.998	1.12e-48	3.84e-46
PDE5A	-1.07428	8.05274	213.71	2.13e-48	7.15e-46
EREG	-1.31765	8.37512	213.278	2.65e-48	8.66e-46
ADAM12	1.36681	7.56284	211.326	7.06e-48	2.25e-45
PTPRN	1.83778	4.77869	210.818	9.11e-48	2.84e-45
COL8A2	1.48233	4.94134	209.322	1.93e-47	5.88e-45
PHGDH	1.33856	5.93464	209.271	1.98e-47	5.9e-45
NAMPT	-1.16566	8.17957	203.205	4.17e-46	1.21e-43
LAMA4	-1.19223	9.46844	201.377	1.05e-45	2.98e-43
KIF26B	1.56321	4.06343	200.277	1.82e-45	5.06e-43
LMCD1	1.43337	4.352	199.468	2.73e-45	7.44e-43
ANKRD29	-1.45685	4.70507	195.925	1.62e-44	4.33e-42
COL5A1	1.07966	9.91205	192.389	9.57e-44	2.51e-41
FAM65B	-1.50595	5.70207	189.858	3.41e-43	8.77e-41
COL4A2	1.31288	10.1173	189.561	3.97e-43	9.98e-41
DPP4	-1.06024	8.98287	189.234	4.67e-43	1.15e-40
IL13RA2	-2.24335	3.22039	189.158	4.85e-43	1.18e-40
COLEC12	-1.04316	7.86837	188.598	6.43e-43	1.53e-40
VCAN	1.63583	5.546	188.339	7.33e-43	1.71e-40
COL1A1	1.42502	13.1655	187.775	9.73e-43	2.23e-40
SLC7A5	1.50292	6.14063	187.386	1.18e-42	2.67e-40
LXN	-1.4842	5.23167	186.642	1.72e-42	3.81e-40
F3	-1.05015	7.99088	186.494	1.85e-42	4.04e-40
HGF	-1.3156	5.52581	186.368	1.97e-42	4.24e-40
ITGA8	-1.75845	4.30269	185.982	2.4e-42	5.06e-40
DDIT4	1.24528	5.14832	182.737	1.22e-41	2.54e-39
AKR1C2	-2.38791	3.00434	173.345	1.38e-39	2.82e-37
CCRL1	-1.2021	4.9808	172.697	1.91e-39	3.84e-37
BGN	1.232	9.15622	172.017	2.68e-39	5.32e-37
SAT1	-1.13536	6.74797	171.386	3.69e-39	7.2e-37
ABCA8	-1.77005	4.28854	170.144	6.88e-39	1.32e-36
DIO2	-1.21116	5.6984	167.113	3.16e-38	6e-36
SFMBT2	-1.56421	4.07689	166.624	4.04e-38	7.56e-36
PERP	-1.10059	8.62584	164.295	1.3e-37	2.41e-35
SLC7A2	1.51442	5.27988	162.913	2.61e-37	4.75e-35
KYNU	-1.54518	3.63715	161.485	5.36e-37	9.61e-35
KIAA1199	-1.67215	9.80333	161.446	5.47e-37	9.67e-35
COL4A6	-2.35106	2.65823	161.242	6.06e-37	1.06e-34
CD36	-1.84571	4.61239	161.01	6.81e-37	1.17e-34
TFPI2	-1.52735	5.77507	160.582	8.44e-37	1.44e-34
NID2	-1.18358	8.33303	159.532	1.43e-36	2.4e-34
ODZ3	1.36441	4.8722	158.714	2.16e-36	3.58e-34
PPP1R12B	-0.99612	6.0296	156.506	6.56e-36	1.07e-33
MGST1	-0.893755	8.27927	155.393	1.15e-35	1.86e-33
COL14A1	-1.17298	6.59733	154.832	1.52e-35	2.43e-33
ODZ1	-1.62125	3.82542	154.088	2.22e-35	3.5e-33
USP53	-1.0254	9.54013	152.126	5.95e-35	9.27e-33
SULF1	1.02417	9.76649	150.837	1.14e-34	1.75e-32
PSG5	-1.12483	6.2302	150.59	1.29e-34	1.96e-32
PRKAR2B	-1.32181	5.12211	150.486	1.36e-34	2.04e-32
SMAD3	-0.954813	8.14135	149.796	1.92e-34	2.86e-32
RECK	-0.805899	8.37553	148.984	2.89e-34	4.25e-32
CLSTN2	1.50133	3.7445	148.327	4.02e-34	5.86e-32
PLA2G4A	-1.55942	4.02115	148.22	4.25e-34	6.11e-32
ARHGAP28	-1.28708	5.21891	147.987	4.77e-34	6.79e-32
CBS	1.00963	5.64934	147.566	5.9e-34	8.31e-32
CCDC68	-2.37462	3.89834	146.453	1.03e-33	1.44e-31
ENPP2	-1.03227	7.67161	145.798	1.44e-33	1.98e-31
EYA4	-1.31939	3.81438	145.072	2.07e-33	2.82e-31
NOV	-1.01919	6.00261	144.897	2.26e-33	3.05e-31
FAM20A	-1.72882	5.45213	144.616	2.61e-33	3.48e-31
SEMA7A	1.17544	4.68376	144.004	3.54e-33	4.69e-31
SOCS2	-1.28492	4.67231	143.629	4.28e-33	5.61e-31
TM4SF1	-0.930519	7.5501	143.451	4.68e-33	6.07e-31
HMCN1	2.22618	4.10458	141.7	1.13e-32	1.45e-30
MMP11	1.62523	3.45331	141.614	1.18e-32	1.5e-30
TXNIP	-0.85637	8.3585	141.438	1.29e-32	1.62e-30
TBC1D8	-1.32587	4.63417	141.158	1.49e-32	1.85e-30
CADM1	1.71857	3.34195	140.709	1.86e-32	2.3e-30
LAMA3	-1.47672	4.43303	140.359	2.22e-32	2.72e-30
SLIT3	1.11034	6.09415	139.798	2.95e-32	3.57e-30
LOC400550	-0.950338	6.24213	138.158	6.73e-32	8.09e-30
TFPI	-1.0924	6.98649	137.927	7.56e-32	9e-30
EFHD1	2.37512	2.58366	137.707	8.45e-32	9.97e-30
PLK2	-0.905103	7.53348	136.423	1.61e-31	1.88e-29
HERC4	-0.910535	8.28256	135.752	2.26e-31	2.62e-29
NIPAL4	2.41883	1.45318	135.446	2.64e-31	3.03e-29
MMD	-1.16499	5.13252	135.422	2.67e-31	3.04e-29
AKR1C1	-2.56664	5.11134	134.124	5.13e-31	5.79e-29
SPOCK1	0.97759	7.10389	132.668	1.07e-30	1.2e-28
PDK4	-2.69638	3.94298	132.066	1.45e-30	1.61e-28
BHLHE40	1.61621	4.00025	131.354	2.07e-30	2.28e-28
WNT2B	-2.10828	2.75361	130.745	2.82e-30	3.07e-28
ACSL4	-0.895037	7.99834	130.267	3.58e-30	3.88e-28
MFAP4	0.985953	7.48909	129.667	4.85e-30	5.2e-28
ASB5	-1.28586	5.87464	129.409	5.52e-30	5.87e-28
AKR1B1	-1.49865	8.83631	127.525	1.43e-29	1.51e-27
CD46	-0.824604	8.77247	125.944	3.16e-29	3.31e-27
PRSS23	0.784188	8.13728	125.792	3.42e-29	3.55e-27
INHBE	2.15076	2.36076	125.746	3.49e-29	3.6e-27
PSAT1	1.10572	6.96299	125.56	3.84e-29	3.93e-27
GLI1	2.34086	1.79566	125.308	4.36e-29	4.42e-27
CHRM2	-1.2176	4.68899	124.9	5.35e-29	5.39e-27
VCAM1	-0.818502	7.14595	124.241	7.46e-29	7.46e-27
FZD8	1.80926	2.90181	124.049	8.22e-29	8.15e-27
SERPINB7	1.19187	6.12266	123.576	1.04e-28	1.03e-26
STS	-1.04825	5.19252	122.094	2.2e-28	2.15e-26
GPM6B	-1.84564	2.8887	121.856	2.48e-28	2.41e-26
SGK223	1.20821	4.62771	121.233	3.4e-28	3.27e-26
SSC5D	1.2975	4.51954	118.974	1.06e-27	1.01e-25
ADAMTS19	-2.35734	4.90929	118.485	1.36e-27	1.29e-25
PPARG	-1.31357	4.16529	118.212	1.56e-27	1.47e-25
PMEPA1	1.51815	3.27575	118.132	1.62e-27	1.51e-25
DCN	-0.818903	9.84865	118.131	1.62e-27	1.51e-25
FAM69A	-0.945937	5.81473	118.01	1.73e-27	1.59e-25
CXCL6	-0.91963	7.74374	117.833	1.89e-27	1.73e-25
FBLN5	0.757493	7.48322	117.206	2.59e-27	2.35e-25
SERPINB2	-0.856623	6.17552	117.072	2.77e-27	2.5e-25
GLI2	1.07587	4.23476	116.692	3.35e-27	3.01e-25
STEAP3	0.919217	5.38237	116.64	3.44e-27	3.07e-25
CABLES1	-1.3719	4.60704	116.534	3.63e-27	3.21e-25
SOD2	-0.715631	10.4177	116.339	4.01e-27	3.52e-25
NR4A2	-2.03778	3.21558	116.079	4.57e-27	3.99e-25
KCNJ2	-1.53314	4.28879	115.379	6.5e-27	5.64e-25
MOXD1	-0.785509	7.94156	114.458	1.03e-26	8.91e-25
GBP2	-0.920103	5.60358	114.068	1.26e-26	1.08e-24
TPM1	0.744007	10.1559	113.944	1.34e-26	1.14e-24
TRIB3	1.06131	4.73049	113.509	1.67e-26	1.41e-24
RARB	-1.11848	4.22796	112.938	2.23e-26	1.87e-24
SPARC	0.688176	12.1401	112.36	2.98e-26	2.49e-24
IRAK3	-0.908413	6.58133	112.033	3.51e-26	2.91e-24
SPECC1	0.950581	4.76789	111.984	3.6e-26	2.97e-24
RARRES1	-1.82152	3.16782	110.454	7.79e-26	6.38e-24
MFSD6	-1.27687	4.59888	110.05	9.55e-26	7.77e-24
CD9	-0.762171	7.24886	109.348	1.36e-25	1.1e-23
TMEM176B	-1.94064	4.32959	109.147	1.51e-25	1.21e-23
CLU	-1.12407	9.4439	108.371	2.23e-25	1.78e-23
C8orf84	-1.96118	3.25467	108.022	2.66e-25	2.11e-23
SVEP1	-0.888542	8.43794	107.169	4.09e-25	3.22e-23
CHST15	-1.03528	4.92236	106.985	4.49e-25	3.52e-23
SLC4A4	-1.79695	3.48338	106.971	4.52e-25	3.52e-23
FSTL3	1.1676	4.95234	106.781	4.97e-25	3.85e-23
PGRMC1	-0.748134	8.3764	106.409	6e-25	4.62e-23
SLC7A14	-1.11307	5.01045	105.988	7.42e-25	5.68e-23
KCNH1	3.51075	2.37998	105.865	7.89e-25	6.01e-23
SH3GL2	-1.16693	4.33126	105.74	8.41e-25	6.36e-23
BAMBI	1.41831	3.17504	105.67	8.71e-25	6.56e-23
BDKRB2	-0.843768	7.95522	105.625	8.91e-25	6.67e-23
ESM1	2.70065	1.45681	104.909	1.28e-24	9.52e-23
B3GALT2	2.34431	1.92101	104.863	1.31e-24	9.68e-23
NR4A3	-1.37859	3.6776	104.309	1.73e-24	1.27e-22
SLC38A11	-1.9618	3.82696	103.736	2.31e-24	1.69e-22
EHF	-1.71867	3.91747	103.633	2.43e-24	1.77e-22
MMP1	0.850603	9.92684	102.473	4.37e-24	3.16e-22
FBN1	0.772476	10.1378	101.195	8.34e-24	6e-22
GPX3	-1.4581	4.52198	100.663	1.09e-23	7.8e-22
PPP2R5A	-0.938313	5.82861	100.555	1.15e-23	8.2e-22
CXCL5	-0.897866	6.51022	99.9243	1.58e-23	1.12e-21
SLC3A2	0.854638	6.58726	99.8793	1.62e-23	1.14e-21
FBN2	0.840096	9.05115	99.3472	2.12e-23	1.48e-21
S1PR3	-0.655188	8.54741	98.3708	3.47e-23	2.42e-21
IDS	-0.65366	7.70232	98.2019	3.78e-23	2.62e-21
TSC22D3	1.06459	4.19811	98.0838	4.01e-23	2.76e-21
MATN2	-1.17047	4.03296	98.0515	4.08e-23	2.79e-21
CDCP1	-0.765367	6.11052	97.99	4.21e-23	2.86e-21
PDCD4	-0.759256	6.67812	97.9827	4.22e-23	2.86e-21
CLCA2	-2.15586	3.53369	97.7511	4.74e-23	3.2e-21
FLRT2	1.40516	4.21237	97.2726	6.04e-23	4.06e-21
C8orf4	-0.767293	6.5944	97.1575	6.4e-23	4.28e-21
LPPR4	-0.723427	6.26426	96.9516	7.1e-23	4.72e-21
ACTA2	0.643129	9.80334	96.895	7.31e-23	4.83e-21
MGC16121	1.34595	3.60559	96.3748	9.51e-23	6.26e-21
ATP2B4	-0.762833	9.62317	96.0379	1.13e-22	7.38e-21
CTHRC1	0.91329	6.76248	95.8453	1.24e-22	8.09e-21
RCAN1	-0.996941	8.11614	95.7437	1.31e-22	8.48e-21
COL16A1	0.936567	8.80733	95.6986	1.34e-22	8.63e-21
LAMP3	1.6639	2.36581	95.0705	1.84e-22	1.18e-20
TLR4	-1.15888	4.4403	94.9756	1.93e-22	1.23e-20
OBFC2A	-0.828206	7.73726	94.8272	2.08e-22	1.32e-20
PTK7	0.90517	7.81511	94.7679	2.14e-22	1.35e-20
SERPINH1	0.800239	9.52694	94.5795	2.35e-22	1.48e-20
COL6A3	0.690646	11.7086	94.4839	2.47e-22	1.55e-20
FHL1	-0.698307	10.0767	94.3389	2.66e-22	1.66e-20
SLC1A4	1.07469	4.19605	94.0458	3.08e-22	1.91e-20
TMEM56	-2.03491	2.09458	93.7133	3.65e-22	2.25e-20
TGM2	0.788811	9.13016	93.6708	3.73e-22	2.29e-20
TMED5	-0.845324	7.52506	93.4703	4.12e-22	2.52e-20
DACT1	1.5661	3.29165	93.3212	4.45e-22	2.71e-20
C1orf21	-1.06921	4.84126	93.2844	4.53e-22	2.75e-20
LPAR1	-0.672455	9.01332	93.1732	4.79e-22	2.89e-20
EML5	2.01607	3.10466	93.166	4.81e-22	2.89e-20
PTGES	-0.988576	5.07684	92.9955	5.24e-22	3.13e-20
ADAM19	0.699154	7.15226	92.6588	6.21e-22	3.7e-20
MITF	-0.961599	5.02294	92.2453	7.66e-22	4.54e-20
PAM	-0.627444	9.14936	91.8714	9.25e-22	5.46e-20
SSX2IP	-0.95925	6.25181	90.8078	1.58e-21	9.3e-20
UNC5B	0.849706	5.54469	90.7349	1.64e-21	9.6e-20
KLHL13	-1.88775	2.49613	90.707	1.67e-21	9.7e-20
LAMB1	-0.63688	9.64521	90.6913	1.68e-21	9.73e-20
ATXN10	-0.661879	8.19972	89.9413	2.45e-21	1.42e-19
TRIM55	-0.847419	5.98123	89.7469	2.71e-21	1.55e-19
FUCA1	-0.858239	5.45108	89.5293	3.02e-21	1.73e-19
ATP8B4	-2.11307	2.32033	88.997	3.95e-21	2.25e-19
DSP	0.859247	6.73256	88.9075	4.14e-21	2.35e-19
LIFR	-0.952195	5.42616	88.0281	6.45e-21	3.64e-19
FGD4	-1.07935	4.83791	87.2511	9.56e-21	5.37e-19
SLC17A5	-0.652452	6.59741	87.218	9.72e-21	5.44e-19
MASP1	-0.796809	9.10491	87.1646	9.99e-21	5.56e-19
MARS	0.675596	7.34515	87.0904	1.04e-20	5.75e-19
COLEC10	-1.44904	2.8834	86.7991	1.2e-20	6.64e-19
PCK2	1.0815	4.88722	86.7696	1.22e-20	6.71e-19
SNCA	-1.57041	3.13018	86.6699	1.28e-20	7.03e-19
ARL6IP5	-0.72077	7.94878	86.4059	1.47e-20	8e-19
ABI3BP	0.993354	4.92302	85.9965	1.8e-20	9.79e-19
MAP3K5	-0.717146	5.97559	85.9815	1.82e-20	9.83e-19
ASNS	1.05848	6.27584	85.7588	2.03e-20	1.1e-18
C11orf41	1.0134	4.34369	85.6935	2.1e-20	1.13e-18
HEXB	-0.700067	8.39089	85.4275	2.4e-20	1.28e-18
PTPLAD2	-0.970882	4.92305	85.303	2.56e-20	1.36e-18
NTN4	-0.636099	8.91355	84.5066	3.83e-20	2.03e-18
VDR	0.916777	4.97749	84.3451	4.16e-20	2.19e-18
MMP14	0.697161	9.45555	84.127	4.64e-20	2.44e-18
MEGF6	0.927743	6.68918	84.1001	4.7e-20	2.46e-18
ACSL3	-0.685919	7.49152	84.0306	4.87e-20	2.54e-18
MAN1C1	-1.23416	3.39182	83.9582	5.05e-20	2.63e-18
DAAM2	0.886582	5.66023	83.9324	5.12e-20	2.65e-18
CD44	-0.631131	10.7296	83.6646	5.86e-20	3.02e-18
LACC1	-0.997445	5.6435	83.3423	6.9e-20	3.53e-18
DNAH5	-1.20553	3.91036	83.3393	6.91e-20	3.53e-18
LFNG	2.67112	1.08162	83.2022	7.41e-20	3.77e-18
TMEM176A	-2.14887	3.97737	83.184	7.48e-20	3.79e-18
C13orf33	-1.19931	3.7201	82.9778	8.3e-20	4.2e-18
KCTD15	0.874795	4.74715	82.8276	8.95e-20	4.51e-18
ARHGAP22	0.99057	4.35346	82.5389	1.04e-19	5.2e-18
GPRC5A	-1.18701	7.04374	82.2213	1.22e-19	6.08e-18
SLC39A8	-0.81676	5.83927	82.1178	1.28e-19	6.38e-18
TMOD1	-2.39753	2.07954	81.7837	1.52e-19	7.53e-18
PTGFR	-0.974305	5.24309	81.182	2.06e-19	1.02e-17
SEMA3A	-0.722918	6.49128	81.1087	2.14e-19	1.05e-17
FAM108C1	-0.886098	4.93533	81.0565	2.19e-19	1.08e-17
LIPA	-0.654884	7.20876	80.9676	2.29e-19	1.12e-17
ST6GAL2	3.57014	0.498207	80.7028	2.62e-19	1.28e-17
MYPN	-1.22572	5.23114	80.4347	3e-19	1.46e-17
CXCL10	-1.26788	3.33057	80.3504	3.14e-19	1.52e-17
MTHFD2	0.751151	6.96383	80.2146	3.36e-19	1.62e-17
CA12	-0.745424	5.31846	80.1274	3.51e-19	1.68e-17
SHROOM2	1.32498	3.44459	79.3637	5.17e-19	2.47e-17
RALGPS2	-0.723739	6.67089	77.9604	1.05e-18	5.01e-17
IDH1	-0.656615	6.8402	77.9069	1.08e-18	5.12e-17
C13orf15	-0.995514	4.77599	77.9025	1.08e-18	5.12e-17
PRRG1	-0.800615	5.91801	77.4079	1.39e-18	6.55e-17
CCNG1	-0.802517	8.20573	77.2625	1.5e-18	7.02e-17
TIMP3	-0.614425	11.3145	77.1324	1.6e-18	7.48e-17
GPD2	-0.69229	5.84673	76.8457	1.85e-18	8.61e-17
SEL1L3	0.846619	4.67663	76.5774	2.12e-18	9.83e-17
BMP2	-1.03273	4.39533	76.2604	2.49e-18	1.15e-16
IGF1	3.34545	0.135154	76.09	2.71e-18	1.25e-16
SHMT2	0.692606	6.81723	76.0095	2.82e-18	1.3e-16
RND3	-0.637901	9.95374	75.9251	2.95e-18	1.35e-16
GALNT5	-0.634855	7.2935	75.7748	3.18e-18	1.45e-16
TFAP2C	-0.850205	4.49024	75.6562	3.38e-18	1.54e-16
CYP1B1	-0.73737	6.43009	75.6419	3.4e-18	1.54e-16
NOX4	1.9397	2.56771	74.9971	4.71e-18	2.13e-16
C3	-0.923987	10.0423	74.9689	4.78e-18	2.15e-16
RBP1	2.10435	1.06503	74.8013	5.21e-18	2.33e-16
NRG1	-0.782988	5.51532	74.6388	5.65e-18	2.53e-16
AFF3	0.880095	5.6058	74.4755	6.14e-18	2.73e-16
KCNG1	2.1104	1.79362	74.3074	6.69e-18	2.97e-16
EIF4EBP1	0.966332	4.86948	74.0537	7.6e-18	3.36e-16
TMEM100	-1.48095	2.01191	73.9672	7.94e-18	3.5e-16
KIAA1217	-0.722777	5.99265	73.8912	8.25e-18	3.63e-16
PFKP	0.772375	5.91986	73.8146	8.58e-18	3.76e-16
FST	0.620099	6.24462	73.7289	8.96e-18	3.91e-16
MCAM	0.703397	6.57904	73.0048	1.29e-17	5.63e-16
LOXL2	0.707825	9.42328	72.9561	1.33e-17	5.75e-16
NUPR1	0.87583	5.66003	72.9061	1.36e-17	5.88e-16
LGALS3	-0.616422	7.72289	72.8095	1.43e-17	6.15e-16
SEMA5A	0.672011	7.78123	72.6621	1.54e-17	6.61e-16
PON2	-0.731789	7.05925	72.4399	1.72e-17	7.37e-16
APCDD1	-0.797125	6.95607	71.823	2.35e-17	1e-15
ENDOD1	-0.708332	6.30315	71.4451	2.85e-17	1.21e-15
MBNL3	-1.25719	2.8071	71.4256	2.88e-17	1.22e-15
NFIL3	-0.753433	5.7327	71.1882	3.25e-17	1.37e-15
IL6ST	-0.695499	10.1638	70.4572	4.7e-17	1.98e-15
CCL8	-2.14437	2.09283	69.9941	5.95e-17	2.5e-15
GPR68	1.126	3.3133	69.9781	6e-17	2.51e-15
ADH1B	-2.5523	3.18167	69.9091	6.21e-17	2.59e-15
SNRK	-0.700172	5.64124	69.8719	6.33e-17	2.63e-15
PODNL1	1.06759	3.30161	69.5717	7.37e-17	3.05e-15
NEAT1	-0.529617	10.0839	69.3937	8.06e-17	3.33e-15
NTRK2	-1.66981	1.8291	69.0693	9.51e-17	3.91e-15
APOD	-1.39716	2.64182	69.0264	9.72e-17	3.99e-15
FER1L6	-1.58333	1.93203	68.6913	1.15e-16	4.71e-15
COL5A3	0.816897	7.00271	68.5577	1.23e-16	5.03e-15
FNDC1	1.9658	1.23109	68.4862	1.28e-16	5.2e-15
HSD11B1	-1.11239	3.71219	68.2528	1.44e-16	5.83e-15
ODZ4	0.996817	4.00084	67.871	1.75e-16	7.05e-15
CHST2	1.12413	3.41917	67.8315	1.78e-16	7.17e-15
CTNNAL1	-0.722615	6.8402	67.7292	1.88e-16	7.53e-15
LRIG1	0.636946	6.57753	67.5737	2.03e-16	8.13e-15
ABCG2	-1.68933	1.96866	67.3343	2.29e-16	9.15e-15
RCC2	0.578844	6.3224	66.9233	2.82e-16	1.12e-14
ELL2	-0.67532	8.21619	66.9003	2.86e-16	1.13e-14
OSMR	-0.57979	7.85698	66.5879	3.35e-16	1.32e-14
KRT7	1.54342	2.71767	66.5531	3.41e-16	1.34e-14
ADAM10	-0.609057	8.06921	66.5449	3.42e-16	1.34e-14
RHOQ	-0.652816	8.13837	66.4379	3.61e-16	1.42e-14
LITAF	-0.541867	7.67158	66.3621	3.75e-16	1.47e-14
EPAS1	-0.602796	9.17897	66.2944	3.88e-16	1.51e-14
KRTAP1-5	-0.859827	6.63698	66.0498	4.4e-16	1.71e-14
BEX1	-1.34301	4.06945	65.9013	4.74e-16	1.83e-14
ANKH	0.787722	5.48311	65.8972	4.75e-16	1.83e-14
MANSC1	-0.916855	3.89411	65.8887	4.77e-16	1.84e-14
TNFRSF19	-0.59439	6.40893	65.8125	4.96e-16	1.9e-14
DENND3	-0.845165	5.72539	65.7502	5.12e-16	1.96e-14
ATP2C1	-0.571445	8.07914	65.7302	5.17e-16	1.97e-14
GNG2	-0.946546	4.83229	65.5671	5.62e-16	2.14e-14
PSD3	-0.711784	6.74021	65.5571	5.65e-16	2.14e-14
EXTL1	1.24935	3.45313	65.5122	5.78e-16	2.19e-14
SPON1	-1.44932	2.01002	65.4125	6.08e-16	2.29e-14
MSC	1.24083	3.16838	65.3034	6.42e-16	2.42e-14
KRT17	1.21576	2.93502	65.2214	6.69e-16	2.51e-14
FAM107B	-0.632582	6.04052	65.2117	6.73e-16	2.52e-14
GLUL	-0.552442	7.21234	64.971	7.6e-16	2.84e-14
DCLK1	-1.24996	3.18599	64.7011	8.72e-16	3.24e-14
2010-09-01	-0.622748	8.05279	64.6369	9.01e-16	3.34e-14
NRP2	0.592995	6.56289	64.5468	9.43e-16	3.49e-14
PDGFA	1.06343	3.145	64.1371	1.16e-15	4.28e-14
GM2A	-1.05965	7.68	63.8895	1.32e-15	4.84e-14
LOC646329	-1.06729	4.72004	63.6723	1.47e-15	5.39e-14
JDP2	0.789257	5.4138	63.5057	1.6e-15	5.85e-14
PPP1R13L	1.41152	2.55596	63.3229	1.75e-15	6.4e-14
DMD	1.067	3.59768	63.2395	1.83e-15	6.66e-14
CD109	-0.64612	8.31361	63.1816	1.88e-15	6.84e-14
VLDLR	1.09158	3.18345	62.9668	2.1e-15	7.6e-14
RNASE4	-0.875841	4.78752	62.7774	2.31e-15	8.35e-14
TNFRSF21	-0.732776	6.01679	62.7533	2.34e-15	8.43e-14
FAM101B	0.601013	6.25125	62.4344	2.75e-15	9.88e-14
SH3RF3	0.705108	4.85979	62.3483	2.88e-15	1.03e-13
GALNT10	0.554221	6.56263	62.1529	3.18e-15	1.13e-13
LRRK2	-1.06866	3.07559	61.989	3.45e-15	1.23e-13
APLP2	-0.597317	8.87755	61.826	3.75e-15	1.33e-13
PLCXD3	-2.37424	1.00663	61.8076	3.79e-15	1.34e-13
GPCPD1	-0.770388	5.26109	61.6975	4e-15	1.41e-13
STXBP6	-1.37516	1.77228	61.6098	4.19e-15	1.47e-13
CTBS	-0.705718	5.76318	61.4796	4.47e-15	1.57e-13
SAMD8	-0.615504	6.22802	61.1085	5.4e-15	1.89e-13
LINC00161	-3.82375	-0.579499	61.0596	5.54e-15	1.93e-13
C5orf41	-0.697277	5.39116	60.7409	6.51e-15	2.27e-13
TMEM2	0.583206	7.45115	60.5291	7.25e-15	2.52e-13
SARS	0.526458	7.47177	60.3842	7.8e-15	2.7e-13
NIPAL3	-0.674965	7.214	60.3626	7.89e-15	2.73e-13
KLF2	1.22694	2.44107	60.262	8.3e-15	2.86e-13
RAB38	-0.97805	3.33318	60.2478	8.36e-15	2.87e-13
SPCS3	-0.669861	8.67684	59.8168	1.04e-14	3.57e-13
ARHGAP6	-1.05874	3.0535	59.7432	1.08e-14	3.7e-13
FJX1	0.76346	4.5207	59.6847	1.11e-14	3.8e-13
ITGB8	-0.971051	3.00857	59.6497	1.13e-14	3.85e-13
ANK1	-0.904706	5.14337	59.4501	1.25e-14	4.26e-13
NUCB2	-0.722495	7.70197	59.4206	1.27e-14	4.31e-13
SIPA1L2	-0.688124	5.27352	59.2861	1.36e-14	4.6e-13
FOXN3	0.662213	6.43361	59.2762	1.37e-14	4.61e-13
IGFBP5	-0.546482	11.636	59.2036	1.42e-14	4.77e-13
MYO1D	0.690481	5.77624	59.1246	1.48e-14	4.96e-13
BMP4	-0.911005	5.19463	59.0249	1.56e-14	5.2e-13
PDGFRA	-0.531065	8.72775	58.8983	1.66e-14	5.52e-13
XYLT1	0.560214	6.52527	58.8967	1.66e-14	5.52e-13
FAM46C	-0.932028	4.52467	58.893	1.66e-14	5.52e-13
EMILIN2	-0.902939	4.2336	58.7575	1.78e-14	5.9e-13
MFAP2	0.781874	6.06798	58.6408	1.89e-14	6.24e-13
TXNRD1	-0.558763	9.77429	58.6087	1.92e-14	6.33e-13
IRAK1	0.760611	5.65869	58.4789	2.05e-14	6.74e-13
NEK7	-0.621742	8.5255	58.4087	2.13e-14	6.96e-13
LRRC17	0.781934	6.09222	58.4059	2.13e-14	6.96e-13
MAN1A1	-0.623965	6.39275	58.3848	2.16e-14	7.02e-13
ITGA6	-0.629002	5.60653	58.3735	2.17e-14	7.04e-13
KITLG	-0.605798	6.68687	58.3688	2.17e-14	7.04e-13
SLC2A12	-0.828052	4.09526	58.1399	2.44e-14	7.89e-13
LOC152742	-1.23065	2.67667	58.1161	2.47e-14	7.97e-13
COL7A1	0.948791	8.21676	58.0949	2.5e-14	8.04e-13
CSF2	1.85438	1.33719	58.047	2.56e-14	8.21e-13
ALPL	1.06038	4.23993	57.8852	2.78e-14	8.9e-13
MAZ	0.638441	6.49534	57.8369	2.85e-14	9.09e-13
PTGIS	-0.845648	5.39806	57.7282	3.01e-14	9.59e-13
CYP39A1	-1.63102	1.72656	57.5608	3.28e-14	1.04e-12
CCDC3	1.64179	1.78345	57.5591	3.28e-14	1.04e-12
DACT3	1.01599	3.46842	57.5381	3.31e-14	1.05e-12
PPAP2B	-0.555233	6.23867	57.4537	3.46e-14	1.09e-12
SH2B3	-0.555786	7.0332	57.4045	3.55e-14	1.12e-12
APH1B	-0.730378	5.07932	57.392	3.57e-14	1.12e-12
GLIPR2	0.714376	4.82724	57.0261	4.3e-14	1.35e-12
FAM198B	0.876147	5.03821	56.9141	4.55e-14	1.42e-12
SLC16A4	-0.696438	5.2982	56.8241	4.77e-14	1.49e-12
SECTM1	-1.18003	4.73706	56.7117	5.05e-14	1.57e-12
ADAM9	-0.547367	9.97433	56.4207	5.85e-14	1.82e-12
REV3L	-0.651284	6.84055	56.2991	6.22e-14	1.93e-12
SAPCD2	1.42927	2.02271	56.2634	6.34e-14	1.96e-12
PPP2R1B	-0.613437	5.73465	56.2429	6.4e-14	1.97e-12
HAS2	1.02301	3.29506	56.1318	6.78e-14	2.08e-12
TRIB2	0.667544	4.9015	56.1099	6.85e-14	2.1e-12
DKK3	-0.569165	10.3895	56.0238	7.16e-14	2.19e-12
ITGB5	0.620661	7.52838	55.9102	7.59e-14	2.32e-12
CD24	-1.22686	3.11108	55.838	7.87e-14	2.4e-12
SIK1	1.50373	1.53364	55.7785	8.11e-14	2.46e-12
VEGFA	0.523747	6.67832	55.6723	8.56e-14	2.6e-12
LOC100505678	1.26813	3.90286	55.6123	8.83e-14	2.66e-12
MEX3B	0.972877	3.0949	55.6117	8.83e-14	2.66e-12
MFSD1	-0.600296	6.97639	55.4699	9.49e-14	2.86e-12
PCYOX1	-0.621206	8.16081	55.4355	9.66e-14	2.9e-12
FMOD	-0.624986	5.75715	55.35	1.01e-13	3.02e-12
A2M	-0.815163	5.06894	55.2786	1.05e-13	3.13e-12
EDNRB	-1.46848	1.56616	54.8241	1.32e-13	3.93e-12
SMARCA1	-0.503383	7.9378	54.8213	1.32e-13	3.93e-12
PDE3B	-1.57999	1.33021	54.743	1.37e-13	4.08e-12
NIPA1	-0.580997	6.12362	54.5571	1.51e-13	4.47e-12
IL6	-0.524329	8.27222	54.5042	1.55e-13	4.58e-12
MME	-0.583931	10.9139	54.4852	1.57e-13	4.62e-12
RTN4	-0.486248	10.4612	54.4755	1.57e-13	4.63e-12
PAQR5	-0.904288	3.67165	54.3903	1.64e-13	4.83e-12
FLNB	0.646817	6.69848	54.2851	1.73e-13	5.08e-12
AGA	-0.779033	5.55583	54.0244	1.98e-13	5.79e-12
TNXB	-1.89863	2.45636	53.9687	2.04e-13	5.94e-12
S100A10	-0.623371	7.59863	53.904	2.11e-13	6.13e-12
AK3	-0.573181	7.35453	53.8592	2.15e-13	6.25e-12
PFKFB4	0.854136	3.90803	53.7002	2.34e-13	6.77e-12
NXPH4	1.64983	1.70566	53.6052	2.45e-13	7.08e-12
CDC42EP1	0.822393	5.51331	53.5944	2.46e-13	7.11e-12
SMPDL3A	-0.712962	4.68994	53.5128	2.57e-13	7.39e-12
MSX2	-0.724187	4.92118	53.4284	2.68e-13	7.7e-12
IGFBP4	-0.778552	10.4059	53.3452	2.8e-13	8.02e-12
HSD17B2	-0.899476	5.12073	53.3292	2.82e-13	8.06e-12
NCKAP5	-0.73516	4.58444	53.2726	2.9e-13	8.28e-12
PMAIP1	-0.629617	6.17197	53.2088	3e-13	8.54e-12
AJUBA	0.5879	6.40032	53.0634	3.23e-13	9.17e-12
ATP1B3	-0.511694	7.59371	53.0494	3.25e-13	9.22e-12
LONP1	0.720023	5.89121	53.0444	3.26e-13	9.22e-12
NPEPPS	-0.481155	7.24491	52.7143	3.86e-13	1.09e-11
LYN	-0.622607	5.03092	52.6648	3.96e-13	1.11e-11
PRDX1	-0.491192	8.90274	52.4176	4.49e-13	1.26e-11
PIKFYVE	-0.546218	6.17223	52.4014	4.52e-13	1.27e-11
FAM174B	-1.87323	2.0725	52.3416	4.66e-13	1.3e-11
ALDH3A2	-0.616553	5.93778	52.254	4.88e-13	1.36e-11
CFL2	-0.562192	7.70249	52.0973	5.28e-13	1.47e-11
GATA6	0.974664	2.78505	52.0967	5.28e-13	1.47e-11
APBB1IP	-0.90578	3.75773	51.8825	5.89e-13	1.63e-11
FRMD4A	0.507705	6.80566	51.7962	6.16e-13	1.7e-11
FZD2	0.630939	6.56374	51.7947	6.16e-13	1.7e-11
SLC7A4	-1.48835	1.67636	51.6979	6.47e-13	1.78e-11
EVL	0.671398	4.62941	51.0374	9.06e-13	2.49e-11
MCFD2	-0.534533	9.08402	50.8678	9.88e-13	2.71e-11
BTG1	-0.51081	7.04072	50.8151	1.01e-12	2.78e-11
ARHGAP29	-0.567816	8.40376	50.6996	1.08e-12	2.94e-11
LAYN	-0.537938	7.73306	50.6836	1.09e-12	2.96e-11
DNM1	0.78645	5.17883	50.576	1.15e-12	3.12e-11
PDLIM4	0.748396	5.84433	50.4498	1.22e-12	3.32e-11
SERPINB1	-0.660807	4.8911	50.3772	1.27e-12	3.44e-11
TFRC	-0.507634	8.70823	50.3402	1.29e-12	3.5e-11
LRCH2	-0.807453	5.16341	50.314	1.31e-12	3.54e-11
TMEM59	-0.560806	8.41678	50.2747	1.34e-12	3.6e-11
GADD45B	0.993918	3.48218	50.2428	1.36e-12	3.65e-11
C6orf192	-0.755004	4.30745	50.1258	1.44e-12	3.86e-11
ASPN	1.05494	3.46474	50.1241	1.44e-12	3.86e-11
LOC730755	-1.40327	3.63381	50.0566	1.49e-12	3.99e-11
OSBPL6	1.12645	3.18035	50.0528	1.5e-12	3.99e-11
MT2A	0.675906	8.6611	50.0024	1.54e-12	4.08e-11
SLC1A1	-0.748192	4.72463	50	1.54e-12	4.08e-11
SLC38A4	1.0891	3.83242	49.9931	1.54e-12	4.09e-11
SESN2	0.731855	4.82575	49.8632	1.65e-12	4.36e-11
CCNYL1	-0.627155	5.29092	49.7593	1.74e-12	4.59e-11
TMEM165	-0.510971	7.75422	49.689	1.8e-12	4.75e-11
MBP	-1.51228	1.6811	49.6611	1.83e-12	4.8e-11
NEDD9	0.863103	4.08303	49.4002	2.09e-12	5.48e-11
FGF13	-1.14125	2.30318	49.1922	2.32e-12	6.08e-11
YWHAQ	-0.4991	9.05876	48.9424	2.64e-12	6.89e-11
WFDC1	0.578031	5.80651	48.8381	2.78e-12	7.25e-11
UST	-0.551092	5.82128	48.7521	2.9e-12	7.56e-11
VNN2	-2.52646	0.428468	48.7411	2.92e-12	7.59e-11
FMNL3	0.563421	5.48641	48.7117	2.96e-12	7.69e-11
SNAP25	-1.01922	3.5323	48.5851	3.16e-12	8.18e-11
PROS1	-1.0234	3.09855	48.5736	3.18e-12	8.22e-11
CCDC69	-1.1085	3.98793	48.3694	3.53e-12	9.1e-11
NMT2	-0.653498	5.11795	48.2248	3.8e-12	9.78e-11
GXYLT1	-0.568348	5.92763	48.2159	3.82e-12	9.8e-11
TMEM30A	-0.513339	9.08727	48.1416	3.97e-12	1.02e-10
RASL11A	-1.4024	2.5026	48.0759	4.1e-12	1.05e-10
MTRNR2L2	-0.595221	9.25817	47.9943	4.27e-12	1.09e-10
YARS	0.471331	7.13886	47.6833	5.01e-12	1.28e-10
ERMP1	-0.665378	4.52215	47.6498	5.1e-12	1.3e-10
RILPL2	-0.75256	4.25677	47.5125	5.47e-12	1.39e-10
CDH24	0.866914	4.16402	47.4646	5.6e-12	1.42e-10
NEDD4L	-0.554929	6.6878	47.4239	5.72e-12	1.45e-10
CUL4B	-0.559767	8.24526	47.3837	5.84e-12	1.47e-10
TACSTD2	-0.839842	3.94067	47.2728	6.18e-12	1.56e-10
ADORA2B	-0.750955	3.96479	47.2671	6.19e-12	1.56e-10
LIMD2	0.963374	3.75312	47.2163	6.36e-12	1.59e-10
ATP6V0E1	-0.461773	7.85433	47.1921	6.44e-12	1.61e-10
NNMT	0.505434	7.41233	47.1439	6.6e-12	1.65e-10
PDE4DIP	-0.449571	8.18905	47.0518	6.91e-12	1.72e-10
ETS2	-0.563427	6.43328	46.9702	7.21e-12	1.79e-10
IGFBP6	-0.937379	7.25656	46.9327	7.35e-12	1.83e-10
SQRDL	-0.566845	6.34247	46.8685	7.59e-12	1.88e-10
NCOR2	0.718513	7.00352	46.8441	7.69e-12	1.9e-10
AUTS2	1.05949	2.02306	46.7965	7.88e-12	1.95e-10
SCN4B	-1.67154	2.98449	46.7813	7.94e-12	1.96e-10
FNDC3A	-0.570918	7.73603	46.7476	8.07e-12	1.99e-10
PAPSS2	-0.479893	8.32534	46.5161	9.09e-12	2.23e-10
TWSG1	-0.578283	8.49896	46.2655	1.03e-11	2.53e-10
PRUNE2	-1.0249	3.39874	46.1635	1.09e-11	2.66e-10
MRVI1	-0.496906	6.66403	46.0679	1.14e-11	2.79e-10
PALLD	-0.448717	9.05131	45.9495	1.21e-11	2.96e-10
SERTAD4	1.01482	3.27423	45.9315	1.22e-11	2.98e-10
NQO1	-0.469574	8.28896	45.9092	1.24e-11	3.01e-10
PLA2R1	-0.582485	5.96875	45.8663	1.27e-11	3.07e-10
DEGS1	-0.479411	8.10382	45.8242	1.29e-11	3.13e-10
CCDC102B	-0.894692	4.33767	45.7646	1.33e-11	3.22e-10
DSEL	-0.501195	7.35417	45.7614	1.34e-11	3.22e-10
ATP13A3	-0.537984	8.18124	45.5081	1.52e-11	3.66e-10
TNFRSF12A	0.607987	6.75885	45.436	1.58e-11	3.79e-10
NT5DC2	0.65337	6.32538	45.3576	1.64e-11	3.94e-10
CPNE3	-0.525129	7.34336	45.3476	1.65e-11	3.95e-10
RAMP1	1.3322	1.90347	45.3415	1.66e-11	3.95e-10
PKIG	-0.525942	6.63292	45.322	1.67e-11	3.99e-10
IER5L	1.09131	2.89002	45.2918	1.7e-11	4.04e-10
SDC1	0.543928	6.27983	45.273	1.71e-11	4.07e-10
CTGF	0.587818	8.95885	45.1057	1.87e-11	4.43e-10
IL1B	-0.48409	7.74008	45.0349	1.94e-11	4.58e-10
SLC11A2	-0.484619	6.8745	45.0321	1.94e-11	4.58e-10
SLC7A1	0.494059	6.54249	45.0131	1.96e-11	4.62e-10
PAWR	0.731671	4.49082	44.9763	1.99e-11	4.7e-10
ZMIZ1	0.491753	6.61798	44.8513	2.13e-11	5e-10
TNPO1	-0.492976	8.79649	44.8457	2.13e-11	5e-10
FADS3	0.695479	6.49344	44.8448	2.13e-11	5e-10
P4HA3	1.08844	3.19694	44.8225	2.16e-11	5.04e-10
LOC149773	2.16157	0.494008	44.7695	2.22e-11	5.17e-10
TBXAS1	-1.79265	1.46093	44.7611	2.23e-11	5.19e-10
DDIT3	0.607554	4.98338	44.7414	2.25e-11	5.23e-10
ADAMTS10	0.949722	3.68946	44.7272	2.26e-11	5.26e-10
FIBIN	-0.483889	6.74753	44.6825	2.32e-11	5.37e-10
BOK	0.829024	4.54354	44.6717	2.33e-11	5.39e-10
EPB41L4B	-1.51828	1.68851	44.6548	2.35e-11	5.43e-10
PNMA2	-0.738629	3.8179	44.5942	2.42e-11	5.59e-10
GPR133	-1.49637	2.04258	44.5452	2.49e-11	5.72e-10
SLC35F2	1.1346	2.69738	44.5199	2.52e-11	5.78e-10
MAN2A1	-0.514708	7.0589	44.464	2.59e-11	5.94e-10
PTPRF	0.583024	6.63292	44.4488	2.61e-11	5.98e-10
CLEC2B	-1.15483	2.32791	44.3841	2.7e-11	6.17e-10
IGFBP7	0.454797	9.30266	44.3479	2.75e-11	6.27e-10
FAM113B	1.26964	1.62953	44.311	2.8e-11	6.38e-10
TEK	0.998599	3.27055	44.3071	2.81e-11	6.38e-10
FHOD1	0.768224	4.4149	43.9481	3.37e-11	7.65e-10
TNFSF15	1.59751	2.91323	43.8945	3.47e-11	7.85e-10
RNF175	-1.1078	2.75571	43.7576	3.72e-11	8.41e-10
RBPMS	-0.470347	6.67608	43.7049	3.82e-11	8.62e-10
CTIF	0.563486	5.90793	43.6589	3.91e-11	8.81e-10
HTATIP2	-0.668018	4.71866	43.6139	4e-11	9e-10
GDE1	-0.468353	7.33731	43.505	4.23e-11	9.5e-10
TINAGL1	-0.947607	4.6577	43.5002	4.24e-11	9.5e-10
PPA1	-0.537236	7.15762	43.494	4.25e-11	9.52e-10
GPT2	0.809024	4.31662	43.4322	4.39e-11	9.81e-10
VSTM4	-0.728234	4.30328	43.4241	4.41e-11	9.83e-10
S100A4	-0.557973	8.7279	43.4083	4.44e-11	9.89e-10
SLC9A9	-0.906703	2.68375	43.3483	4.58e-11	1.02e-09
GNAI1	-0.534242	6.56136	43.2527	4.81e-11	1.07e-09
KLF5	0.658614	4.44809	43.2171	4.9e-11	1.09e-09
CRABP2	-0.624163	8.15917	43.0918	5.22e-11	1.16e-09
WNT2	0.636639	4.99883	43.0882	5.23e-11	1.16e-09
LAPTM4A	-0.459438	9.36993	42.9853	5.52e-11	1.22e-09
DAZL	-1.46164	1.33461	42.979	5.53e-11	1.22e-09
MAF	-1.23888	2.0289	42.9203	5.7e-11	1.25e-09
SRGN	-0.756648	4.59305	42.8734	5.84e-11	1.28e-09
ATP10A	1.00728	3.28282	42.8515	5.91e-11	1.29e-09
ADAMTS12	0.523211	6.49568	42.821	6e-11	1.31e-09
SERINC1	-0.484577	9.27684	42.7885	6.1e-11	1.33e-09
GLRX	-0.572763	6.31273	42.7523	6.21e-11	1.35e-09
PLXDC1	1.83023	0.654618	42.6509	6.54e-11	1.42e-09
ANO4	-0.941557	3.79533	42.6426	6.57e-11	1.43e-09
SYTL2	-0.649986	5.44452	42.5533	6.88e-11	1.49e-09
RNF11	-0.551696	7.45428	42.5503	6.89e-11	1.49e-09
IL32	0.680456	4.62342	42.5227	6.99e-11	1.51e-09
SCN11A	-1.37052	0.982489	42.4713	7.17e-11	1.55e-09
ITGA2	-0.541918	7.21934	42.4581	7.22e-11	1.56e-09
NFIB	-1.84912	0.311839	42.4521	7.24e-11	1.56e-09
KCNS3	1.14517	1.71001	42.3857	7.49e-11	1.61e-09
EXT2	-0.439745	8.00135	42.3	7.83e-11	1.68e-09
LAMA1	0.650858	4.41383	42.26	7.99e-11	1.71e-09
FLT1	0.562897	8.1152	42.2163	8.17e-11	1.75e-09
HAUS7	0.892556	3.74214	42.0852	8.74e-11	1.86e-09
AMDHD2	1.20274	2.10871	42.0841	8.74e-11	1.86e-09
EML1	-0.473965	6.22704	41.8937	9.64e-11	2.05e-09
ISM1	-1.61241	1.63871	41.8932	9.64e-11	2.05e-09
TMBIM4	-0.487279	6.33363	41.8449	9.88e-11	2.09e-09
MYOCD	-0.628111	6.09089	41.7616	1.03e-10	2.18e-09
CD59	-0.422446	9.92086	41.7515	1.04e-10	2.19e-09
IGFBP2	-1.14984	5.7093	41.7496	1.04e-10	2.19e-09
GLIPR1	-0.483071	7.25195	41.7249	1.05e-10	2.21e-09
ACSL5	-1.11498	2.26389	41.7212	1.05e-10	2.21e-09
OSBPL10	0.74563	4.1498	41.6817	1.07e-10	2.25e-09
GALNTL2	0.715912	3.78598	41.6089	1.11e-10	2.34e-09
TCF21	-1.27715	2.1526	41.1885	1.38e-10	2.89e-09
FUS	0.430879	7.38992	40.9392	1.57e-10	3.28e-09
DNAJC6	-0.694358	4.1601	40.9138	1.59e-10	3.32e-09
CD47	-0.504852	7.47697	40.8585	1.64e-10	3.41e-09
ADAMTSL1	-0.876341	4.04162	40.8336	1.66e-10	3.45e-09
PRDX4	-0.441577	7.09693	40.7055	1.77e-10	3.67e-09
UCN2	0.91633	3.33315	40.6838	1.79e-10	3.71e-09
VASH1	0.726658	3.88879	40.6759	1.8e-10	3.72e-09
C7orf58	-0.495289	7.23737	40.6629	1.81e-10	3.74e-09
IL18	-1.41247	1.69791	40.4811	1.99e-10	4.09e-09
DTNA	-0.782854	3.74661	40.4356	2.03e-10	4.18e-09
SPSB1	0.630978	4.60552	40.422	2.05e-10	4.21e-09
RASL12	-1.47012	1.39469	40.3923	2.08e-10	4.26e-09
HIPK2	-0.544388	6.93237	40.392	2.08e-10	4.26e-09
PTGS1	-0.496478	8.52864	40.287	2.19e-10	4.49e-09
NFAT5	-0.526164	7.50326	40.2631	2.22e-10	4.53e-09
CSRP2	0.625878	5.63427	40.2624	2.22e-10	4.53e-09
NAPG	-0.485341	5.83071	40.0997	2.41e-10	4.91e-09
CTSB	-0.519908	11.869	40.0237	2.51e-10	5.1e-09
TCTN1	-0.550742	5.3415	39.947	2.61e-10	5.3e-09
DCLK2	0.510359	5.42678	39.8524	2.74e-10	5.55e-09
C10orf116	-1.2357	3.01558	39.713	2.94e-10	5.95e-09
ENPP1	0.715774	4.81295	39.7121	2.94e-10	5.95e-09
MCTP2	-0.918419	2.97962	39.572	3.16e-10	6.38e-09
C9orf3	0.560341	5.28348	39.5075	3.27e-10	6.58e-09
GPRC5B	-0.83261	3.80876	39.5058	3.27e-10	6.58e-09
MAL2	-1.1893	1.59464	39.4308	3.4e-10	6.83e-09
S100A16	0.446347	6.84354	39.3878	3.47e-10	6.97e-09
SCML1	-0.707705	4.7864	39.359	3.53e-10	7.06e-09
AKR1C3	-1.82975	0.496153	39.3028	3.63e-10	7.26e-09
GBE1	-0.435763	7.22516	39.2865	3.66e-10	7.3e-09
ICAM5	0.94233	3.99953	39.2451	3.74e-10	7.45e-09
CEP19	-0.850029	3.41511	39.116	3.99e-10	7.95e-09
PTPN21	0.576571	5.89166	39.1125	4e-10	7.95e-09
SAA1	1.1693	2.03952	39.0458	4.14e-10	8.21e-09
ARSJ	-0.452385	6.76412	38.9666	4.31e-10	8.54e-09
PDE8B	-0.785161	4.05678	38.9536	4.34e-10	8.58e-09
ATXN2L	0.489422	6.95318	38.8325	4.62e-10	9.12e-09
ZNF702P	-0.976129	2.84481	38.7933	4.71e-10	9.29e-09
BNIP3L	-0.497516	7.77181	38.7677	4.77e-10	9.39e-09
CCDC28B	0.88284	3.191	38.7668	4.78e-10	9.39e-09
UBASH3B	-0.446484	6.638	38.7504	4.82e-10	9.45e-09
STK17A	-0.578022	6.66157	38.7436	4.83e-10	9.47e-09
H2AFX	0.714975	4.38474	38.6921	4.96e-10	9.71e-09
PKD1L1	2.13974	0.404425	38.6626	5.04e-10	9.85e-09
SLC14A1	0.685818	4.5744	38.6137	5.17e-10	1.01e-08
MBOAT1	0.960602	2.70252	38.5687	5.29e-10	1.03e-08
ZNF185	0.772777	2.79938	38.3782	5.83e-10	1.13e-08
FLJ43663	-0.921517	3.63189	38.1882	6.42e-10	1.25e-08
CYTL1	-0.731566	4.04886	38.1421	6.58e-10	1.28e-08
YPEL5	-0.442375	7.67393	38.1302	6.62e-10	1.28e-08
TSPYL2	0.467667	5.71816	38.0907	6.75e-10	1.31e-08
FUCA2	-0.416384	6.82552	38.0525	6.89e-10	1.33e-08
LMNB2	0.581522	6.36999	38.0181	7.01e-10	1.35e-08
FGL2	-2.03002	-0.103847	37.997	7.09e-10	1.36e-08
PTK2B	-0.696953	4.4567	37.9775	7.16e-10	1.38e-08
EFHA2	-0.712857	4.88588	37.9753	7.16e-10	1.38e-08
PLXDC2	4.57081	0.221233	37.9255	7.35e-10	1.41e-08
ANKRD13A	-0.431424	7.47511	37.8658	7.58e-10	1.45e-08
MYBL2	0.894101	3.44238	37.8654	7.58e-10	1.45e-08
SOD3	-1.03397	6.50283	37.8258	7.74e-10	1.48e-08
CBX2	1.6552	0.622656	37.7954	7.86e-10	1.5e-08
MYZAP	-1.51949	1.24853	37.7663	7.97e-10	1.52e-08
DLC1	0.472262	6.75387	37.7516	8.03e-10	1.53e-08
CALU	-0.4432	10.981	37.6907	8.29e-10	1.57e-08
ZNF618	0.525258	5.09469	37.6367	8.52e-10	1.61e-08
SMURF2	-0.462735	8.31962	37.6232	8.58e-10	1.62e-08
SMAD7	0.689363	3.65757	37.6056	8.66e-10	1.64e-08
TMEM87B	-0.483952	6.54507	37.5838	8.76e-10	1.65e-08
KRT81	2.12059	0.544677	37.5482	8.92e-10	1.68e-08
MECOM	0.935716	2.58022	37.4486	9.39e-10	1.77e-08
UBE2S	0.645348	4.98494	37.3533	9.86e-10	1.85e-08
DCHS1	0.741647	6.00228	37.3516	9.86e-10	1.85e-08
GNG11	-0.675435	7.12244	37.2681	1.03e-09	1.93e-08
LOXL4	-0.534201	8.73536	37.2163	1.06e-09	1.98e-08
SLC38A2	-0.426447	10.4929	37.1805	1.08e-09	2.01e-08
ACO1	-0.396084	8.19456	37.1111	1.12e-09	2.08e-08
JAG1	-0.540734	5.21156	37.0828	1.13e-09	2.11e-08
SLC16A6	-0.881326	2.85757	37.0784	1.13e-09	2.11e-08
COL10A1	1.29125	1.60873	37.0776	1.14e-09	2.11e-08
TMEM123	-0.544015	8.65778	37.0577	1.15e-09	2.13e-08
ANKRD33B	-0.821757	3.35587	36.9985	1.18e-09	2.19e-08
ELF3	-0.885392	3.04504	36.9431	1.22e-09	2.25e-08
LEPROT	-0.45218	8.00088	36.8986	1.24e-09	2.3e-08
ARL4C	0.70649	3.27523	36.8704	1.26e-09	2.33e-08
STAMBPL1	-0.7167	4.48808	36.8302	1.29e-09	2.37e-08
CD55	-0.570109	5.86023	36.7405	1.35e-09	2.48e-08
FSCN1	0.630806	7.12852	36.7224	1.36e-09	2.5e-08
TNFSF18	1.29892	3.12565	36.7223	1.36e-09	2.5e-08
IER3	0.525529	6.41416	36.7126	1.37e-09	2.51e-08
MGC45800	1.34325	1.27376	36.7	1.38e-09	2.52e-08
MOSPD1	-0.551806	5.80318	36.6793	1.39e-09	2.54e-08
COL4A5	-0.550936	5.79802	36.6473	1.42e-09	2.58e-08
CDH4	1.61099	1.15081	36.5949	1.45e-09	2.65e-08
FOXD1	0.725679	4.17031	36.572	1.47e-09	2.68e-08
ARRDC4	-0.550619	6.97332	36.5633	1.48e-09	2.68e-08
PLAU	-0.491844	8.75482	36.558	1.48e-09	2.69e-08
C1QTNF6	0.708682	4.18046	36.5553	1.48e-09	2.69e-08
HMGA1	0.524986	8.22336	36.5022	1.52e-09	2.76e-08
PLCG1	0.505141	6.62898	36.4862	1.54e-09	2.78e-08
GSTM3	-0.573715	5.25106	36.4729	1.55e-09	2.79e-08
PRSS12	0.421537	6.96841	36.4709	1.55e-09	2.79e-08
SST	-1.6304	0.799051	36.4612	1.56e-09	2.8e-08
TNS3	0.422282	8.46538	36.4501	1.57e-09	2.81e-08
TMEM22	-0.669406	4.66442	36.4078	1.6e-09	2.87e-08
MALT1	-0.508657	6.00416	36.401	1.61e-09	2.88e-08
CDH11	0.406461	8.04898	36.3945	1.61e-09	2.88e-08
ASPH	-0.451685	10.032	36.3937	1.61e-09	2.88e-08
PPAP2A	-0.571391	4.6823	36.2976	1.69e-09	3.02e-08
STX12	-0.466152	7.29037	36.1746	1.8e-09	3.21e-08
KAT2B	-0.522706	5.07497	36.1681	1.81e-09	3.22e-08
TCF3	0.543038	5.94901	36.1674	1.81e-09	3.22e-08
FOXP4	0.663394	4.62657	36.1312	1.84e-09	3.27e-08
CXorf69	-0.691607	4.41059	36.0417	1.93e-09	3.42e-08
TXN	-0.408496	8.13929	35.9788	1.99e-09	3.53e-08
C9orf47	-0.985809	2.11889	35.9748	2e-09	3.53e-08
C1orf133	0.927681	2.49392	35.8964	2.08e-09	3.67e-08
DENND2A	-0.526911	5.78546	35.8213	2.16e-09	3.81e-08
SH3BP5L	0.631143	5.04503	35.7808	2.21e-09	3.88e-08
UGCG	-0.495636	6.35047	35.7797	2.21e-09	3.88e-08
ABHD2	-0.421018	6.81382	35.7375	2.26e-09	3.96e-08
IQGAP2	-1.93377	0.656907	35.7106	2.29e-09	4.01e-08
RAB15	0.689513	3.51129	35.7053	2.3e-09	4.02e-08
SLC1A3	0.905355	2.15083	35.666	2.34e-09	4.09e-08
IL7R	0.608158	4.66748	35.6451	2.37e-09	4.13e-08
SGIP1	-0.452143	6.70261	35.6227	2.39e-09	4.18e-08
CEBPG	0.510496	5.30506	35.5655	2.47e-09	4.29e-08
SDCBP	-0.441908	8.30378	35.5513	2.48e-09	4.32e-08
KRT34	-1.08635	3.47989	35.4976	2.55e-09	4.43e-08
RAB11A	-0.390968	7.61358	35.4019	2.68e-09	4.65e-08
STC2	-0.429927	9.28672	35.3803	2.71e-09	4.69e-08
HSDL2	-0.548941	6.06155	35.3792	2.71e-09	4.69e-08
ASCC3	-0.468462	7.96594	35.3723	2.72e-09	4.7e-08
PML	0.535361	5.8436	35.3471	2.76e-09	4.76e-08
ZNF512B	0.664631	5.31342	35.2904	2.84e-09	4.89e-08
FAM65C	-0.613626	6.20348	35.2751	2.86e-09	4.93e-08
GRB10	0.491503	5.29869	35.1849	3e-09	5.15e-08
ARID5B	-0.420604	7.91641	35.0743	3.17e-09	5.45e-08
HIC1	0.900621	3.62289	35.0065	3.29e-09	5.63e-08
SPTBN5	1.12863	1.908	35.0061	3.29e-09	5.63e-08
CLUL1	-1.09634	1.97054	35.0035	3.29e-09	5.63e-08
SGMS2	-0.565012	5.78144	34.9837	3.32e-09	5.67e-08
PPDPF	0.640423	6.09964	34.9824	3.33e-09	5.67e-08
TBC1D8B	-0.61597	5.54722	34.9423	3.4e-09	5.78e-08
SCARB2	-0.434035	8.7877	34.8973	3.48e-09	5.91e-08
DUSP3	-0.440872	6.44653	34.8778	3.51e-09	5.96e-08
TNFSF4	0.912183	3.30152	34.8761	3.51e-09	5.96e-08
COL24A1	0.882616	3.31679	34.856	3.55e-09	6.01e-08
LIMS2	0.691884	5.62312	34.8202	3.62e-09	6.12e-08
ME1	-0.525483	6.0757	34.8067	3.64e-09	6.15e-08
GULP1	-0.574682	5.44056	34.8004	3.65e-09	6.16e-08
KIF18B	0.960859	2.33481	34.792	3.67e-09	6.18e-08
RARA	0.760748	4.14391	34.7898	3.67e-09	6.18e-08
LOC100129034	0.4506	6.17611	34.6176	4.01e-09	6.74e-08
SKIL	0.608022	5.61919	34.5601	4.13e-09	6.94e-08
CCL7	-0.554543	5.38327	34.5477	4.16e-09	6.97e-08
PNPLA8	-0.555955	5.75819	34.5124	4.24e-09	7.09e-08
LMAN1	-0.427671	9.03502	34.4367	4.4e-09	7.36e-08
FAS	-0.519088	6.85937	34.3963	4.5e-09	7.51e-08
ADAMTS6	0.657789	4.42802	34.3429	4.62e-09	7.71e-08
MYO3B	-1.65264	0.595644	34.3108	4.7e-09	7.83e-08
HSPB3	-1.03762	3.16263	34.2286	4.9e-09	8.15e-08
ERF	0.689875	4.98261	34.2131	4.94e-09	8.21e-08
EPS8	-0.480266	6.65342	34.207	4.96e-09	8.22e-08
CLN8	0.589263	4.70794	34.1907	5e-09	8.28e-08
SAMD4A	-0.412471	7.34904	34.1661	5.06e-09	8.38e-08
SCD5	-0.470263	5.74535	34.1501	5.1e-09	8.44e-08
SERPING1	-0.520365	6.30716	34.13	5.16e-09	8.51e-08
P2RX7	0.847706	3.05393	34.118	5.19e-09	8.55e-08
PAG1	-0.540547	4.59379	34.087	5.27e-09	8.68e-08
REPIN1	0.575003	6.15174	34.0397	5.4e-09	8.88e-08
CAMKK1	1.07344	2.20795	33.9691	5.6e-09	9.19e-08
KCNK2	0.498788	5.71277	33.9684	5.6e-09	9.19e-08
SNX18	-0.42486	7.1597	33.9607	5.62e-09	9.21e-08
PDGFC	0.541738	6.04404	33.9597	5.63e-09	9.21e-08
ERO1L	-0.564553	6.68612	33.9163	5.75e-09	9.41e-08
KCNE4	0.613662	4.40573	33.9097	5.77e-09	9.43e-08
ANXA4	-0.422972	6.78885	33.9006	5.8e-09	9.46e-08
COL5A2	0.384436	10.3724	33.8936	5.82e-09	9.48e-08
CFLAR	-0.431305	7.12491	33.892	5.83e-09	9.48e-08
VARS2	0.618889	4.29109	33.8315	6.01e-09	9.76e-08
MYH9	0.476274	10.2111	33.8127	6.07e-09	9.85e-08
SEC62	-0.467307	8.10054	33.8042	6.09e-09	9.88e-08
VAMP3	-0.398022	7.647	33.7559	6.25e-09	1.01e-07
FAM195B	0.756566	4.88427	33.7242	6.35e-09	1.03e-07
MMP3	0.454982	7.75409	33.7234	6.35e-09	1.03e-07
CDS2	-0.464517	5.91871	33.6801	6.5e-09	1.05e-07
COL1A2	0.475308	13.6359	33.626	6.68e-09	1.08e-07
OSGIN2	-0.502036	5.63994	33.6119	6.73e-09	1.08e-07
UHRF1	0.593298	5.09289	33.5935	6.79e-09	1.09e-07
LHFP	-0.46479	6.95412	33.5718	6.87e-09	1.1e-07
ETV4	0.825272	4.19374	33.5291	7.02e-09	1.13e-07
MFGE8	0.522216	9.37563	33.4618	7.27e-09	1.16e-07
RCN1	-0.442203	9.51388	33.2615	8.06e-09	1.29e-07
SYTL5	1.33074	2.49161	33.2323	8.18e-09	1.31e-07
NSF	-0.476699	7.22579	33.2202	8.23e-09	1.31e-07
MARCKSL1	0.517896	5.4502	33.1697	8.45e-09	1.35e-07
AMD1	-0.462074	7.16563	33.1611	8.48e-09	1.35e-07
DDX39A	0.65501	4.51258	33.1555	8.51e-09	1.35e-07
G0S2	-0.858558	3.73044	33.1464	8.55e-09	1.36e-07
PTP4A2	-0.397715	8.74194	33.124	8.65e-09	1.37e-07
PPP1R14B	0.6365	5.93261	33.1131	8.69e-09	1.38e-07
SEMA4D	-0.988915	2.70687	33.0828	8.83e-09	1.4e-07
BBC3	0.88527	3.58755	33.0789	8.85e-09	1.4e-07
CPD	-0.433851	8.14853	33.0464	9e-09	1.42e-07
FAM63B	-0.549887	5.37171	33.0018	9.21e-09	1.45e-07
MXRA8	0.665852	7.77062	32.9097	9.65e-09	1.52e-07
UBE2C	0.674798	4.15994	32.8971	9.72e-09	1.53e-07
ST6GALNAC2	-1.60148	0.633369	32.8654	9.88e-09	1.55e-07
ENAH	-0.423912	7.8394	32.8567	9.92e-09	1.56e-07
NIPAL2	-0.579005	4.95146	32.7687	1.04e-08	1.63e-07
MIIP	0.907108	2.63202	32.7011	1.07e-08	1.68e-07
C10orf58	-0.780851	3.4805	32.6758	1.09e-08	1.7e-07
ZNF362	0.78855	4.25753	32.6709	1.09e-08	1.7e-07
LOC728743	0.755226	3.77555	32.6079	1.13e-08	1.76e-07
COPS4	-0.459263	6.50682	32.5894	1.14e-08	1.77e-07
LRCH4	0.640569	4.72953	32.5871	1.14e-08	1.77e-07
TLE3	0.658786	4.47306	32.498	1.19e-08	1.85e-07
SECISBP2L	-0.465369	7.06182	32.4667	1.21e-08	1.88e-07
RBM38	0.855687	2.48042	32.4644	1.21e-08	1.88e-07
SOX12	0.681562	4.83882	32.3904	1.26e-08	1.95e-07
PTPN11	-0.394677	8.52012	32.3856	1.26e-08	1.95e-07
B4GALT5	-0.396822	6.65916	32.3573	1.28e-08	1.98e-07
SLC7A7	0.730577	3.60305	32.3401	1.29e-08	2e-07
AGTR1	1.21235	2.27176	32.332	1.3e-08	2e-07
LRRN3	-0.818419	6.45318	32.2697	1.34e-08	2.06e-07
EID1	-0.516822	8.75616	32.2595	1.35e-08	2.07e-07
CDR2L	0.603239	4.80404	32.239	1.36e-08	2.09e-07
SNX29	-0.443316	5.75387	32.2027	1.39e-08	2.13e-07
CD68	-0.664978	5.04489	32.1886	1.4e-08	2.14e-07
ZADH2	-0.472772	5.66509	32.1528	1.43e-08	2.18e-07
TBC1D23	-0.454057	6.41933	32.1396	1.43e-08	2.19e-07
ADO	0.503166	5.48003	32.1265	1.44e-08	2.2e-07
ANAPC13	-0.477163	7.0473	32.1231	1.45e-08	2.21e-07
ZSWIM4	0.732641	3.50014	32.1183	1.45e-08	2.21e-07
MGST2	-0.57074	4.46584	32.1158	1.45e-08	2.21e-07
MYOZ1	2.22524	-0.316859	32.0947	1.47e-08	2.23e-07
CTSK	-0.393922	9.67847	32.0911	1.47e-08	2.23e-07
CAPZA1	-0.421611	8.19794	32.0813	1.48e-08	2.24e-07
SELT	-0.490372	7.33381	32.0807	1.48e-08	2.24e-07
ACPP	-0.544426	4.42234	32.0652	1.49e-08	2.25e-07
CAV1	-0.369308	10.6356	32.0222	1.52e-08	2.3e-07
ADAM23	-0.510084	4.94432	31.9271	1.6e-08	2.41e-07
KCTD9	-0.46943	6.77373	31.9064	1.62e-08	2.44e-07
DHRS7	-0.47629	6.26236	31.8604	1.66e-08	2.49e-07
TMEM159	-0.474362	5.60584	31.8482	1.67e-08	2.51e-07
PXDN	0.368382	10.0739	31.7938	1.71e-08	2.57e-07
ACTC1	2.17291	-0.248772	31.753	1.75e-08	2.63e-07
FLRT3	-0.707311	3.39229	31.7439	1.76e-08	2.64e-07
MPHOSPH6	-0.585472	5.24618	31.7119	1.79e-08	2.68e-07
C9orf5	-0.420656	6.76226	31.6163	1.88e-08	2.81e-07
FAM196B	0.906827	2.74182	31.6097	1.88e-08	2.81e-07
ADI1	-0.410092	6.66661	31.5961	1.9e-08	2.83e-07
EMID2	2.02112	0.209811	31.5065	1.99e-08	2.96e-07
SYT12	1.63191	0.295727	31.4769	2.02e-08	3e-07
ALDH7A1	0.443092	6.01902	31.4331	2.06e-08	3.07e-07
H19	2.30377	-0.416494	31.4231	2.08e-08	3.08e-07
ATP6AP2	-0.430714	8.59928	31.3343	2.17e-08	3.22e-07
VASN	0.634756	6.85572	31.298	2.21e-08	3.28e-07
PRR5L	0.6779	3.87442	31.2492	2.27e-08	3.36e-07
KIAA0415	0.646509	4.79312	31.2333	2.29e-08	3.38e-07
CNNM1	-0.789917	3.00307	31.2179	2.31e-08	3.4e-07
NCEH1	-0.514978	5.79192	31.2128	2.31e-08	3.41e-07
NRN1	-1.45248	0.956508	31.1786	2.35e-08	3.46e-07
RASSF3	-0.400367	7.19303	31.1784	2.35e-08	3.46e-07
SLIT2	-0.409729	6.76087	31.1069	2.44e-08	3.59e-07
IGF1R	0.458649	5.78081	31.0876	2.47e-08	3.62e-07
LPAR3	-1.06288	2.22424	31.0577	2.5e-08	3.67e-07
FMO3	-1.75037	0.398155	30.9867	2.6e-08	3.81e-07
HSBP1L1	-0.777461	3.93517	30.9688	2.62e-08	3.84e-07
TFAP4	0.972489	1.86172	30.9202	2.69e-08	3.93e-07
MT1M	2.20527	-0.785134	30.8873	2.73e-08	3.99e-07
CXCL1	-0.36554	9.33496	30.8521	2.78e-08	4.06e-07
SLC38A5	0.961583	2.26471	30.7936	2.87e-08	4.18e-07
NFE2	-1.41456	0.911153	30.7799	2.89e-08	4.2e-07
TUSC3	-0.397967	7.19334	30.7205	2.98e-08	4.33e-07
PTX3	-0.39463	8.60106	30.686	3.03e-08	4.4e-07
DNAJC25	-0.713048	4.56085	30.6539	3.08e-08	4.47e-07
FSTL1	0.367562	11.6044	30.6503	3.09e-08	4.48e-07
KDM6B	0.564736	4.66302	30.6427	3.1e-08	4.49e-07
SERINC3	-0.368888	8.01651	30.6006	3.17e-08	4.57e-07
RHOBTB3	-0.420642	8.15766	30.5995	3.17e-08	4.57e-07
CACNA1G	2.28658	-0.321558	30.5979	3.17e-08	4.57e-07
SERPINB9	-0.582327	4.13691	30.5973	3.18e-08	4.57e-07
TOR1AIP2	-0.424333	6.58208	30.5673	3.22e-08	4.64e-07
FAM188A	-0.509808	5.52831	30.5664	3.23e-08	4.64e-07
PTN	-0.500665	5.6257	30.5489	3.26e-08	4.67e-07
PI4K2B	-0.532947	5.571	30.4723	3.39e-08	4.86e-07
KLF4	-0.639376	4.97588	30.4405	3.44e-08	4.93e-07
ENTPD4	-0.390309	7.25581	30.2727	3.75e-08	5.37e-07
TM2D1	-0.496714	5.3928	30.2641	3.77e-08	5.39e-07
AQP3	-1.26248	1.41785	30.2402	3.82e-08	5.45e-07
XPR1	-0.406858	5.96437	30.236	3.83e-08	5.46e-07
SLC1A5	0.508266	7.27669	30.164	3.97e-08	5.66e-07
C1GALT1C1	-0.507312	5.70828	30.1494	4e-08	5.69e-07
PDLIM7	0.579639	7.38746	30.0303	4.25e-08	6.05e-07
TSHZ3	0.491174	4.80221	30.0116	4.29e-08	6.1e-07
VAC14	0.555757	4.83067	29.949	4.44e-08	6.29e-07
NPAS2	0.432599	6.01097	29.9428	4.45e-08	6.31e-07
RBM42	0.651116	5.12192	29.9315	4.48e-08	6.34e-07
HIST1H2BK	-0.507717	6.67692	29.8616	4.64e-08	6.56e-07
ABHD4	0.466189	5.70468	29.8612	4.64e-08	6.56e-07
AARS	0.410037	7.16925	29.8404	4.69e-08	6.62e-07
VNN3	-1.96992	0.592032	29.8215	4.74e-08	6.68e-07
MEF2A	-0.425172	6.19253	29.8129	4.76e-08	6.7e-07
GPR125	-0.409077	6.36142	29.763	4.88e-08	6.87e-07
KDELR3	-0.394665	7.57895	29.6136	5.27e-08	7.41e-07
OLFML3	0.393843	7.13095	29.611	5.28e-08	7.41e-07
PPME1	0.413804	6.15228	29.6021	5.3e-08	7.43e-07
ROBO2	0.553868	4.81596	29.6016	5.31e-08	7.43e-07
FAM105A	-0.766659	2.61778	29.5949	5.32e-08	7.45e-07
SSH2	-0.507429	4.74295	29.5911	5.33e-08	7.46e-07
CDK4	0.449918	6.51268	29.5608	5.42e-08	7.56e-07
ZNF365	0.90684	3.05333	29.5598	5.42e-08	7.56e-07
TUBB3	0.75782	4.71516	29.5364	5.49e-08	7.64e-07
RNF150	0.584718	4.5348	29.5306	5.5e-08	7.66e-07
KCNIP3	-0.790763	4.54803	29.4908	5.62e-08	7.81e-07
PDGFRB	0.475205	8.6918	29.4805	5.65e-08	7.84e-07
METTL7A	-0.856483	2.79924	29.407	5.87e-08	8.13e-07
B2M	-0.409935	11.4611	29.4057	5.87e-08	8.13e-07
TLN2	0.563309	4.7384	29.3957	5.9e-08	8.17e-07
KANK1	-0.40256	6.19346	29.3767	5.96e-08	8.24e-07
PHF17	0.543003	4.69919	29.3613	6.01e-08	8.29e-07
GAS6	0.606718	9.55982	29.361	6.01e-08	8.29e-07
ZNF578	-0.796839	2.81561	29.2654	6.31e-08	8.7e-07
CLN5	-0.491894	6.11756	29.2303	6.43e-08	8.85e-07
ELF1	-0.387038	6.15774	29.1471	6.71e-08	9.23e-07
SPHK1	0.859483	4.43328	29.1312	6.76e-08	9.29e-07
CCDC85B	0.856273	4.9471	29.0822	6.94e-08	9.52e-07
FAM64A	0.740121	2.90502	29.0563	7.03e-08	9.64e-07
NBPF3	-0.416223	6.17386	28.9806	7.31e-08	1e-06
WDR18	0.751447	4.23886	28.9267	7.52e-08	1.03e-06
EDIL3	0.994269	2.1956	28.9018	7.61e-08	1.04e-06
SMAD9	-0.939084	2.20825	28.8906	7.66e-08	1.05e-06
HOOK2	0.695913	3.52563	28.8377	7.87e-08	1.07e-06
ZFAND5	-0.390384	8.66628	28.7269	8.33e-08	1.14e-06
CYBRD1	-0.403223	9.44264	28.7227	8.35e-08	1.14e-06
EPHB2	0.476495	5.39901	28.7161	8.38e-08	1.14e-06
WSB1	-0.35969	7.28447	28.7102	8.41e-08	1.14e-06
KIAA0494	-0.370275	7.12284	28.6956	8.47e-08	1.15e-06
CDK2AP2	0.641627	4.20545	28.6902	8.49e-08	1.15e-06
SLC29A1	0.560269	4.19589	28.6723	8.57e-08	1.16e-06
HK2	-0.430969	6.03554	28.6445	8.7e-08	1.18e-06
MKLN1	-0.472409	6.73223	28.6336	8.75e-08	1.18e-06
ROBO1	0.39826	6.86639	28.6061	8.87e-08	1.2e-06
CD63	-0.383281	9.69721	28.6012	8.89e-08	1.2e-06
EPHB3	0.857677	2.56132	28.5399	9.18e-08	1.24e-06
AURKB	0.853675	3.13803	28.5052	9.34e-08	1.26e-06
CLTCL1	0.647446	3.28754	28.3774	9.98e-08	1.34e-06
C21orf7	0.652322	4.2849	28.3459	1.01e-07	1.36e-06
GK	-0.519769	4.30169	28.3254	1.03e-07	1.38e-06
HIGD1A	-0.455202	7.61969	28.2976	1.04e-07	1.39e-06
COL27A1	0.589871	5.59844	28.294	1.04e-07	1.4e-06
ARHGAP31	0.520566	5.19741	28.2855	1.05e-07	1.4e-06
DTWD1	-0.600171	6.07542	28.2564	1.06e-07	1.42e-06
SLC40A1	-0.887493	2.74081	28.2501	1.07e-07	1.42e-06
KIAA0319L	-0.42034	6.4502	28.1982	1.1e-07	1.46e-06
ERLIN2	-0.405087	6.98326	28.1961	1.1e-07	1.46e-06
SLC31A1	-0.358801	6.83586	28.1664	1.11e-07	1.48e-06
CPEB4	-0.486754	5.70241	28.1489	1.12e-07	1.49e-06
AMZ1	1.22854	1.48394	28.1478	1.12e-07	1.49e-06
TTYH3	0.596268	7.67008	28.1285	1.14e-07	1.51e-06
HMGB3	0.555436	4.84493	28.1126	1.14e-07	1.52e-06
PRCP	-0.360755	7.36957	28.0994	1.15e-07	1.53e-06
LOC730101	0.443566	5.49698	28.049	1.18e-07	1.56e-06
GNS	-0.341218	9.02262	28.0008	1.21e-07	1.6e-06
HERC3	-0.511288	5.39874	27.9884	1.22e-07	1.61e-06
STRN4	0.520832	5.73886	27.9794	1.23e-07	1.62e-06
ITFG1	-0.407417	7.45657	27.966	1.23e-07	1.63e-06
PAQR8	-0.610295	3.90839	27.9622	1.24e-07	1.63e-06
RPN2	-0.348783	9.14054	27.9214	1.26e-07	1.66e-06
PLAC8	-0.903893	2.18927	27.8978	1.28e-07	1.68e-06
C9orf21	-0.621093	4.11629	27.8937	1.28e-07	1.68e-06
TRAM1	-0.483077	9.66722	27.8918	1.28e-07	1.68e-06
TNRC18	0.66845	6.03358	27.8913	1.28e-07	1.68e-06
GLIS3	-0.38459	5.91725	27.8844	1.29e-07	1.68e-06
MXRA5	-0.396167	9.36401	27.8389	1.32e-07	1.72e-06
BACE2	0.418302	6.04801	27.8284	1.33e-07	1.73e-06
ST7L	-0.531813	5.02053	27.8278	1.33e-07	1.73e-06
KCNMA1	-0.397206	6.26433	27.8149	1.33e-07	1.74e-06
DYNC1LI1	-0.481965	6.30279	27.8014	1.34e-07	1.75e-06
CHD3	0.383223	7.73487	27.7657	1.37e-07	1.78e-06
KIRREL3	0.787541	3.13288	27.7493	1.38e-07	1.79e-06
KIF22	0.627336	4.00868	27.6955	1.42e-07	1.84e-06
CMTM3	0.433678	5.33903	27.6318	1.47e-07	1.9e-06
MAB21L1	0.442334	5.75119	27.6061	1.49e-07	1.93e-06
SNAPC3	-0.448717	5.67289	27.5739	1.51e-07	1.96e-06
SMO	0.610411	4.21132	27.5651	1.52e-07	1.96e-06
CHTF18	0.946753	2.19953	27.5387	1.54e-07	1.99e-06
PIK3R3	-0.539802	4.75343	27.5161	1.56e-07	2.01e-06
ADD3	-0.407453	7.87516	27.4971	1.57e-07	2.03e-06
PYCR1	0.647971	6.16691	27.4543	1.61e-07	2.07e-06
NET1	0.424775	6.14779	27.4329	1.63e-07	2.09e-06
EDEM2	-0.504401	5.21665	27.428	1.63e-07	2.09e-06
LRRN4CL	-0.774163	4.12095	27.4274	1.63e-07	2.09e-06
SH3TC2	-0.922982	2.86747	27.4236	1.63e-07	2.1e-06
CAMK2D	-0.411649	6.90257	27.4213	1.64e-07	2.1e-06
MEF2D	0.431562	5.95066	27.3448	1.7e-07	2.18e-06
G3BP2	-0.388246	8.17207	27.3441	1.7e-07	2.18e-06
SAR1A	-0.366895	7.97355	27.2716	1.77e-07	2.26e-06
CPNE2	0.540082	4.66119	27.1538	1.88e-07	2.4e-06
RNF144B	-0.613566	3.68327	27.1439	1.89e-07	2.41e-06
ABCA6	-1.7834	0.655051	27.1395	1.89e-07	2.41e-06
WIPI1	-0.366316	6.75012	27.0905	1.94e-07	2.47e-06
PARP10	1.05688	2.97625	27.0556	1.98e-07	2.51e-06
ATF4	0.352231	8.47175	27.0516	1.98e-07	2.52e-06
GMFB	-0.470636	7.12259	27.0219	2.01e-07	2.55e-06
MCM5	0.732124	4.12553	26.9724	2.06e-07	2.62e-06
HTRA3	0.773658	2.83601	26.9142	2.13e-07	2.69e-06
GLIS2	0.649779	4.96784	26.8778	2.17e-07	2.74e-06
SCUBE3	0.431793	6.6453	26.8619	2.19e-07	2.76e-06
BCAP29	-0.446896	6.48208	26.8135	2.24e-07	2.83e-06
MYLK	-0.313668	10.4062	26.7935	2.26e-07	2.85e-06
ADRB2	-1.06487	1.8337	26.7926	2.26e-07	2.85e-06
C6orf72	-0.536093	6.45302	26.7777	2.28e-07	2.87e-06
IFNAR1	-0.486461	7.1254	26.7751	2.29e-07	2.87e-06
TRAM2	0.341675	8.66702	26.7746	2.29e-07	2.87e-06
FRZB	-0.993207	1.61943	26.7662	2.3e-07	2.88e-06
GUSBP11	0.587147	3.57381	26.7644	2.3e-07	2.88e-06
NT5C	0.665899	3.47655	26.7582	2.31e-07	2.89e-06
CLDN1	-0.391629	7.23613	26.7577	2.31e-07	2.89e-06
TMBIM6	-0.330124	9.43097	26.7529	2.31e-07	2.89e-06
CA5B	-0.806942	3.05641	26.7389	2.33e-07	2.91e-06
SACM1L	-0.462632	6.12093	26.7378	2.33e-07	2.91e-06
TMEM9B	-0.471155	6.11338	26.7173	2.36e-07	2.94e-06
ZNF768	0.563493	4.49816	26.7043	2.37e-07	2.95e-06
H1FX	0.57357	4.85811	26.6993	2.38e-07	2.96e-06
IL1A	-0.767944	4.08569	26.6992	2.38e-07	2.96e-06
EMILIN1	0.645675	7.79603	26.6718	2.41e-07	3e-06
KIT	-0.752967	3.39347	26.6577	2.43e-07	3.01e-06
C6orf141	-1.92337	0.186582	26.6211	2.48e-07	3.07e-06
GRK5	-0.524097	5.79916	26.5915	2.51e-07	3.11e-06
PRKAA2	-0.868539	2.81125	26.5048	2.63e-07	3.25e-06
SPNS1	0.730941	4.71207	26.4985	2.64e-07	3.26e-06
ZNHIT6	-0.453834	6.07003	26.4885	2.65e-07	3.27e-06
TAOK3	-0.391496	6.08735	26.4748	2.67e-07	3.3e-06
UBE2L6	0.464146	5.70909	26.4564	2.7e-07	3.32e-06
SDK1	-0.970988	2.89964	26.4555	2.7e-07	3.32e-06
MAP7D1	0.466	6.91644	26.3861	2.8e-07	3.44e-06
ZNF804A	-0.755728	3.80542	26.383	2.8e-07	3.44e-06
POU2F2	0.38161	6.98342	26.3805	2.8e-07	3.44e-06
RCC1	0.532896	4.92281	26.3263	2.88e-07	3.54e-06
LOC646324	1.64788	0.541209	26.2976	2.93e-07	3.58e-06
IKBIP	-0.500942	7.59335	26.2974	2.93e-07	3.58e-06
SLC7A8	0.623602	3.50757	26.2946	2.93e-07	3.59e-06
MPP5	-0.438291	6.23465	26.2732	2.96e-07	3.62e-06
PTGR1	-0.378612	6.30993	26.2625	2.98e-07	3.64e-06
PLAT	-0.410713	8.24339	26.1639	3.14e-07	3.83e-06
SIM1	-0.537224	5.10553	26.142	3.17e-07	3.87e-06
SLC9A6	-0.47709	5.27763	26.086	3.27e-07	3.98e-06
CCL13	-1.75319	0.180346	26.0854	3.27e-07	3.98e-06
SQSTM1	0.415481	9.17016	26.0826	3.27e-07	3.98e-06
TBC1D1	-0.376371	6.08205	26.0757	3.28e-07	3.99e-06
HNRNPM	0.338999	7.19065	26.0615	3.31e-07	4.01e-06
RRAS2	-0.42801	6.8778	26.0454	3.33e-07	4.04e-06
MCM7	0.487949	5.67007	26.0341	3.35e-07	4.06e-06
SNED1	-0.701656	3.49133	26.0213	3.38e-07	4.09e-06
TMEM160	1.22704	1.25623	26.0078	3.4e-07	4.11e-06
PEX19	-0.369165	6.43726	25.9915	3.43e-07	4.14e-06
C7orf50	0.813499	4.36578	25.9544	3.5e-07	4.22e-06
YIPF4	-0.390718	5.79017	25.8974	3.6e-07	4.34e-06
SF3A2	0.528661	4.83232	25.8963	3.6e-07	4.34e-06
TMED7	-0.458508	7.70711	25.8884	3.62e-07	4.35e-06
CCNDBP1	-0.398904	5.85091	25.8567	3.68e-07	4.42e-06
CYP51A1	-0.432585	6.36188	25.8363	3.72e-07	4.46e-06
RAB23	-0.42072	7.19671	25.8061	3.77e-07	4.53e-06
CFH	-0.376428	7.29374	25.7997	3.79e-07	4.54e-06
TRIM28	0.574343	7.0002	25.7984	3.79e-07	4.54e-06
MTRNR2L1	-0.465198	6.40111	25.7869	3.81e-07	4.56e-06
PLD1	-0.457584	5.40287	25.7746	3.84e-07	4.59e-06
CEP85L	-0.57334	4.42829	25.7703	3.85e-07	4.59e-06
MAGT1	-0.38997	7.35368	25.749	3.89e-07	4.64e-06
BDNF	-0.356617	6.46631	25.7304	3.93e-07	4.68e-06
ASAP2	0.413988	6.30497	25.7276	3.93e-07	4.68e-06
ZNF451	-0.495876	5.53695	25.7256	3.94e-07	4.68e-06
PDK1	-0.483116	4.82793	25.7245	3.94e-07	4.68e-06
LMNB1	0.62313	4.4939	25.6924	4e-07	4.76e-06
UAP1L1	0.639357	4.74317	25.681	4.03e-07	4.78e-06
CPZ	-0.684669	5.32025	25.6781	4.03e-07	4.78e-06
HS3ST3B1	0.943137	1.85431	25.6779	4.03e-07	4.78e-06
TTLL6	-2.24603	-0.417748	25.6617	4.07e-07	4.82e-06
TXNDC15	-0.391415	7.13083	25.63	4.14e-07	4.89e-06
WHSC2	0.627957	3.66311	25.6275	4.14e-07	4.89e-06
LTB4R	0.715776	2.73394	25.5494	4.31e-07	5.09e-06
SLC36A4	-0.522688	4.22129	25.5406	4.33e-07	5.11e-06
CCL26	-2.20561	0.261117	25.5135	4.39e-07	5.18e-06
LOC100192378	-1.34817	0.748011	25.4306	4.59e-07	5.4e-06
SMARCA4	0.431164	6.41054	25.4154	4.62e-07	5.44e-06
DDX49	0.691804	4.35145	25.3976	4.66e-07	5.48e-06
SCOC	-0.560295	6.97276	25.3837	4.7e-07	5.52e-06
ROCK2	-0.442453	7.06582	25.3436	4.8e-07	5.63e-06
MCM2	0.631082	4.01981	25.3381	4.81e-07	5.64e-06
FEM1C	-0.425299	5.63389	25.3344	4.82e-07	5.65e-06
IPMK	-0.726073	4.15026	25.331	4.83e-07	5.65e-06
ADPGK	-0.368781	6.32632	25.3209	4.85e-07	5.67e-06
PLIN2	-0.348825	7.14793	25.2832	4.95e-07	5.78e-06
SHANK2	-1.3354	1.26043	25.239	5.06e-07	5.91e-06
RAB3IL1	0.664794	3.52438	25.2327	5.08e-07	5.92e-06
KIF6	1.45134	0.442207	25.2188	5.12e-07	5.96e-06
PKD1	0.653789	6.50664	25.2134	5.13e-07	5.97e-06
LOC283050	0.8289	2.02575	25.2038	5.16e-07	6e-06
PVRL3	-0.424066	7.12917	25.1869	5.2e-07	6.05e-06
WDR26	-0.344888	8.07303	25.1632	5.27e-07	6.11e-06
CHI3L2	-0.989099	1.54484	25.1479	5.31e-07	6.16e-06
ICAM1	0.377237	8.15757	25.0762	5.51e-07	6.39e-06
ELFN2	1.13527	2.33685	25.0435	5.61e-07	6.49e-06
FAM20B	-0.425197	6.68324	25.0398	5.62e-07	6.5e-06
BOP1	0.799441	4.02914	25.0084	5.71e-07	6.6e-06
IQCK	-0.709024	3.6252	25.003	5.72e-07	6.61e-06
SAMD1	0.814546	2.67073	24.9954	5.75e-07	6.63e-06
CHST11	0.815167	2.59307	24.9804	5.79e-07	6.68e-06
FOXC1	-0.498152	4.87953	24.9781	5.8e-07	6.68e-06
MEG3	-0.37671	9.27399	24.9701	5.82e-07	6.7e-06
DNAJB4	-0.492906	7.0781	24.9619	5.85e-07	6.72e-06
SYNPO2L	-1.47194	1.58147	24.9583	5.86e-07	6.73e-06
LIME1	1.16686	1.44432	24.9517	5.88e-07	6.75e-06
COL21A1	-0.80696	3.46869	24.9438	5.9e-07	6.77e-06
BAG2	-0.387924	7.06709	24.9217	5.97e-07	6.84e-06
DUSP5	-0.526853	5.45666	24.8917	6.06e-07	6.94e-06
TGOLN2	-0.324682	8.94587	24.8764	6.11e-07	6.99e-06
ANKRD11	0.373278	6.75992	24.8601	6.16e-07	7.04e-06
DRP2	0.711977	3.50713	24.8516	6.19e-07	7.06e-06
SCP2	-0.36881	7.36126	24.8512	6.19e-07	7.06e-06
KIFC1	0.804718	3.7127	24.805	6.34e-07	7.23e-06
HPSE	-1.24756	1.22423	24.7845	6.41e-07	7.3e-06
LMBRD1	-0.45597	5.74081	24.7724	6.45e-07	7.34e-06
SPPL2A	-0.417162	6.45604	24.7614	6.49e-07	7.37e-06
TNIK	-0.673139	3.39019	24.7348	6.58e-07	7.47e-06
MTRNR2L8	-0.58087	8.64143	24.7169	6.64e-07	7.53e-06
CELSR2	0.744167	2.75165	24.7147	6.65e-07	7.54e-06
U2AF2	0.402602	6.8437	24.7042	6.68e-07	7.57e-06
SIX5	0.647027	3.95423	24.6427	6.9e-07	7.81e-06
PLXNA1	0.493927	7.14657	24.6361	6.92e-07	7.83e-06
ADHFE1	-0.590402	3.41143	24.6296	6.95e-07	7.85e-06
HSPG2	0.663075	8.0312	24.6196	6.98e-07	7.88e-06
PABPC1L	0.653856	4.05599	24.5735	7.15e-07	8.07e-06
UBTD1	0.716817	4.09484	24.5689	7.17e-07	8.08e-06
MIB2	0.748159	4.32273	24.5508	7.24e-07	8.15e-06
ADORA2A	-1.38947	2.30796	24.4933	7.46e-07	8.39e-06
DOT1L	0.581641	4.27585	24.4453	7.65e-07	8.59e-06
MICAL2	0.367516	6.62014	24.4269	7.72e-07	8.66e-06
PRKAR1A	-0.328008	9.01676	24.4259	7.72e-07	8.66e-06
BCL7C	0.640093	3.97272	24.4144	7.77e-07	8.71e-06
RASSF8	-0.407542	7.18167	24.395	7.85e-07	8.79e-06
NOSIP	0.608164	4.40955	24.3802	7.91e-07	8.85e-06
MKI67	0.459821	5.66747	24.3668	7.96e-07	8.9e-06
IRF2BP2	0.382894	5.93398	24.3248	8.14e-07	9.09e-06
GPR110	-1.52315	0.809114	24.3146	8.18e-07	9.13e-06
RFXANK	0.640928	3.81265	24.3032	8.23e-07	9.18e-06
CNN2	0.481318	8.37598	24.2996	8.25e-07	9.19e-06
DDAH1	-0.390443	8.11175	24.2984	8.25e-07	9.19e-06
SGTA	0.479876	5.44665	24.2729	8.36e-07	9.3e-06
FAM176A	0.609488	4.51159	24.2682	8.38e-07	9.32e-06
EPHA4	-0.517929	4.03099	24.2589	8.42e-07	9.35e-06
CASP10	-0.978704	2.08334	24.2463	8.48e-07	9.41e-06
SLC9A1	0.471602	5.71265	24.2349	8.53e-07	9.45e-06
ME3	0.703254	2.99838	24.2005	8.68e-07	9.62e-06
UBE2H	-0.353745	8.29554	24.1671	8.83e-07	9.78e-06
CECR1	-0.686533	3.14074	24.1391	8.96e-07	9.91e-06
LDOC1L	0.438422	5.77513	24.1195	9.05e-07	1e-05
USP12	-0.418936	6.08733	24.1	9.15e-07	1.01e-05
C1RL	-0.429147	5.44012	24.0755	9.26e-07	1.02e-05
GTPBP2	0.440022	6.01247	24.016	9.55e-07	1.05e-05
PHLDA1	-0.38286	7.96585	24.0081	9.59e-07	1.06e-05
HAGHL	0.867584	2.31199	24.0005	9.63e-07	1.06e-05
TMF1	-0.435448	6.99794	23.9986	9.64e-07	1.06e-05
MAPT	-1.1137	1.42718	23.9872	9.7e-07	1.07e-05
PI15	1.78213	-0.616901	23.9789	9.74e-07	1.07e-05
CDC20	0.681058	4.49328	23.9484	9.9e-07	1.09e-05
GCC2	-0.587011	6.44803	23.9356	9.96e-07	1.09e-05
REEP5	-0.358345	7.54144	23.9284	1e-06	1.09e-05
ACAP2	-0.412737	7.05187	23.9212	1e-06	1.1e-05
UCK2	0.450497	5.46773	23.9198	1e-06	1.1e-05
LIMA1	-0.344033	8.97305	23.8937	1.02e-06	1.11e-05
C1orf226	-1.3367	1.999	23.8926	1.02e-06	1.11e-05
NAB2	0.498451	5.29648	23.8903	1.02e-06	1.11e-05
ABHD12	-0.412997	6.15594	23.8151	1.06e-06	1.16e-05
SCN3A	-1.45295	0.273805	23.809	1.06e-06	1.16e-05
TREX1	0.900343	2.19879	23.7958	1.07e-06	1.16e-05
MBD3	0.737309	5.28981	23.7851	1.08e-06	1.17e-05
CXXC5	0.909137	3.48938	23.7771	1.08e-06	1.17e-05
SUSD1	-0.472167	4.93207	23.7653	1.09e-06	1.18e-05
LYRM7	-0.517506	4.63169	23.7504	1.1e-06	1.19e-05
KRT19	-0.88415	5.56827	23.7261	1.11e-06	1.2e-05
CCDC110	-1.73856	0.246439	23.7151	1.12e-06	1.21e-05
LPIN1	-0.388178	6.04721	23.7136	1.12e-06	1.21e-05
LYST	-0.599954	5.57851	23.6867	1.13e-06	1.22e-05
FAM100A	0.71542	3.51291	23.6585	1.15e-06	1.24e-05
IRS2	0.531511	4.37689	23.6572	1.15e-06	1.24e-05
NBEAL2	0.716868	3.15124	23.6561	1.15e-06	1.24e-05
FAHD2B	1.0528	1.40935	23.6494	1.16e-06	1.24e-05
ITGA4	-0.385432	6.87068	23.636	1.16e-06	1.25e-05
FMN2	-0.512228	5.59557	23.6177	1.18e-06	1.26e-05
KIAA0930	0.364756	6.32289	23.5783	1.2e-06	1.29e-05
TIGD5	0.816744	1.85419	23.571	1.2e-06	1.29e-05
ARHGEF2	0.413677	6.9169	23.557	1.21e-06	1.3e-05
TRNP1	-0.339726	6.72139	23.5422	1.22e-06	1.31e-05
PDIA5	-0.394172	5.77231	23.5315	1.23e-06	1.32e-05
SURF2	0.851385	2.21066	23.5107	1.24e-06	1.33e-05
C1orf86	0.691602	4.20115	23.5076	1.24e-06	1.33e-05
NDUFV2	-0.365773	6.69416	23.4986	1.25e-06	1.34e-05
MBOAT2	0.554644	4.72426	23.4892	1.26e-06	1.34e-05
DBN1	0.474335	7.30622	23.4682	1.27e-06	1.35e-05
SNX6	-0.393701	7.93613	23.4398	1.29e-06	1.37e-05
SLCO2B1	-1.4049	1.33477	23.4374	1.29e-06	1.37e-05
DNM3OS	0.644117	5.89231	23.4365	1.29e-06	1.37e-05
ARF5	0.554273	5.3202	23.4349	1.29e-06	1.37e-05
DDX3X	-0.331755	8.72748	23.4305	1.3e-06	1.38e-05
CDON	-0.503638	3.9126	23.4264	1.3e-06	1.38e-05
C15orf24	-0.336379	6.88791	23.4188	1.3e-06	1.38e-05
STK32B	-0.429794	5.18595	23.4008	1.32e-06	1.39e-05
PLK1	0.585118	4.28594	23.3881	1.32e-06	1.4e-05
ACADSB	-0.499155	4.69622	23.3691	1.34e-06	1.41e-05
ISG15	1.00936	5.2651	23.3552	1.35e-06	1.42e-05
XAB2	0.544004	4.48457	23.3469	1.35e-06	1.43e-05
KLHDC3	0.449853	5.59747	23.3423	1.36e-06	1.43e-05
MFAP5	0.628402	5.23971	23.3256	1.37e-06	1.44e-05
ERGIC2	-0.450787	6.5192	23.3222	1.37e-06	1.44e-05
ZNF213	0.788024	2.77268	23.3057	1.38e-06	1.45e-05
RPLP1	0.441769	9.24839	23.2915	1.39e-06	1.46e-05
VAMP4	-0.480764	5.74253	23.2855	1.4e-06	1.47e-05
CITED4	1.10342	1.9868	23.2769	1.4e-06	1.47e-05
TUBA1B	0.322451	8.36734	23.2729	1.41e-06	1.47e-05
ZNF358	0.57431	4.93666	23.2443	1.43e-06	1.5e-05
C21orf58	0.760203	2.29461	23.2431	1.43e-06	1.5e-05
TUBB	0.30866	10.2447	23.1926	1.47e-06	1.53e-05
GABRE	-0.458289	4.36574	23.1779	1.48e-06	1.54e-05
ARSD	-0.482077	4.5143	23.1608	1.49e-06	1.56e-05
NAA60	0.535553	4.96767	23.1542	1.5e-06	1.56e-05
PAFAH1B3	0.729682	2.58024	23.1515	1.5e-06	1.56e-05
SGK1	-0.37928	5.82378	23.1186	1.52e-06	1.59e-05
CBX4	0.56486	3.78546	23.093	1.54e-06	1.61e-05
FOXM1	0.559557	4.65443	23.0772	1.56e-06	1.62e-05
PJA2	-0.356551	7.89663	23.0709	1.56e-06	1.62e-05
UHMK1	-0.395022	7.34813	23.0558	1.57e-06	1.64e-05
RARRES3	-0.969169	1.7595	23.0194	1.6e-06	1.67e-05
SLC22A4	-0.464131	4.61592	23.0134	1.61e-06	1.67e-05
CCDC124	0.636353	4.71103	22.9941	1.62e-06	1.68e-05
RFK	-0.516802	5.46375	22.9899	1.63e-06	1.69e-05
SNX13	-0.405124	6.09687	22.9825	1.63e-06	1.69e-05
FOXE1	-0.546661	4.41877	22.9797	1.64e-06	1.69e-05
ALDH9A1	-0.355226	6.72706	22.9689	1.65e-06	1.7e-05
CREBL2	-0.393465	6.16419	22.9657	1.65e-06	1.7e-05
NEK6	0.355631	6.31179	22.9448	1.67e-06	1.72e-05
MYLIP	-0.571617	3.75067	22.9438	1.67e-06	1.72e-05
AMT	0.603638	3.42326	22.9109	1.7e-06	1.75e-05
MIR31HG	0.715749	2.59843	22.9094	1.7e-06	1.75e-05
IL11	0.472421	4.38705	22.9009	1.71e-06	1.75e-05
LOC646214	-0.794001	2.11857	22.8583	1.74e-06	1.79e-05
YDJC	0.723974	2.61784	22.8507	1.75e-06	1.8e-05
NTHL1	0.747131	2.81785	22.8382	1.76e-06	1.81e-05
DENND4A	-0.44053	5.4967	22.8295	1.77e-06	1.81e-05
KDM5C	0.450624	6.36421	22.8286	1.77e-06	1.81e-05
MET	0.393327	6.76381	22.8076	1.79e-06	1.83e-05
APBB3	0.617782	4.02859	22.8035	1.79e-06	1.84e-05
NFE2L3	-0.402812	6.56937	22.7846	1.81e-06	1.85e-05
ERLEC1	-0.400848	7.45542	22.7721	1.82e-06	1.86e-05
SPG20	-0.342045	7.16251	22.7536	1.84e-06	1.88e-05
PTPRC	-1.84856	0.0972099	22.7359	1.86e-06	1.9e-05
MAMDC4	0.849333	2.29656	22.702	1.89e-06	1.93e-05
SGCE	-0.421041	6.68627	22.6971	1.9e-06	1.93e-05
ATXN1	-0.392452	6.30632	22.6881	1.91e-06	1.94e-05
ZNF469	0.622855	5.55277	22.68	1.91e-06	1.95e-05
VNN1	-0.986776	1.47707	22.6772	1.92e-06	1.95e-05
EXOC6B	-0.489219	4.42471	22.6755	1.92e-06	1.95e-05
CAST	-0.391287	8.3886	22.6592	1.93e-06	1.96e-05
C17orf70	0.696608	3.97319	22.65	1.94e-06	1.97e-05
SLC2A4RG	0.724601	5.05051	22.6376	1.96e-06	1.98e-05
PLEKHO1	0.442544	5.18382	22.6229	1.97e-06	1.99e-05
MAN1A2	-0.387102	6.57986	22.6113	1.98e-06	2.01e-05
TAGLN	0.397821	9.92659	22.6016	1.99e-06	2.01e-05
ODC1	0.358095	6.51255	22.5885	2.01e-06	2.03e-05
ABCC4	-0.383984	6.95471	22.5791	2.02e-06	2.03e-05
TEC	-1.1962	1.8006	22.5768	2.02e-06	2.04e-05
TNFSF10	-1.02002	1.98073	22.5503	2.05e-06	2.06e-05
XXYLT1	0.442139	4.82112	22.5157	2.08e-06	2.1e-05
IL1RN	-0.886272	2.25	22.5089	2.09e-06	2.1e-05
SH3D19	0.461837	6.08509	22.4921	2.11e-06	2.12e-05
KCNQ3	-1.39379	0.854622	22.4704	2.13e-06	2.14e-05
2015-09-01	-0.403293	8.01544	22.458	2.15e-06	2.16e-05
MT1L	0.572905	3.92795	22.4549	2.15e-06	2.16e-05
THSD4	-0.354171	6.95693	22.45	2.16e-06	2.16e-05
SH3BGRL	-0.403292	8.04003	22.4459	2.16e-06	2.16e-05
TMEM164	-0.433164	5.08278	22.4181	2.19e-06	2.19e-05
FOXF2	-0.483294	4.51308	22.394	2.22e-06	2.22e-05
CYB5B	-0.341548	6.82428	22.3809	2.24e-06	2.23e-05
DGKE	-0.570607	4.02536	22.3405	2.28e-06	2.28e-05
LAMC2	0.499852	4.80429	22.3334	2.29e-06	2.29e-05
ALDH1A1	-0.535233	4.42104	22.3269	2.3e-06	2.29e-05
CROCC	0.655363	3.49906	22.3198	2.31e-06	2.3e-05
MT1X	0.901723	2.61201	22.3058	2.33e-06	2.31e-05
MDFI	1.91141	-0.391175	22.3038	2.33e-06	2.31e-05
ST3GAL2	0.472469	5.0541	22.269	2.37e-06	2.35e-05
SLC19A1	0.877478	2.24355	22.2657	2.37e-06	2.36e-05
C5orf62	-0.388988	5.87354	22.2517	2.39e-06	2.37e-05
STXBP3	-0.403617	6.10658	22.2482	2.4e-06	2.37e-05
USO1	-0.381947	8.31934	22.2039	2.45e-06	2.43e-05
CDH3	0.633883	3.12274	22.2022	2.45e-06	2.43e-05
ZFP36L2	-0.325026	7.89582	22.1999	2.46e-06	2.43e-05
TCF4	0.394663	7.08962	22.181	2.48e-06	2.45e-05
FAM82B	-0.43247	6.00722	22.1466	2.53e-06	2.49e-05
CARS	0.319682	6.54826	22.1448	2.53e-06	2.49e-05
FAM172A	-0.475244	5.31603	22.1299	2.55e-06	2.51e-05
OGFRL1	-0.473514	5.77958	22.1203	2.56e-06	2.52e-05
RUSC2	0.546518	5.82178	22.1139	2.57e-06	2.53e-05
BTRC	-0.379045	5.74876	22.0962	2.59e-06	2.55e-05
SPEG	0.552258	6.03555	22.0942	2.6e-06	2.55e-05
ZNF528	-0.469939	4.87825	22.0716	2.63e-06	2.58e-05
VPS29	-0.406291	6.28432	22.0709	2.63e-06	2.58e-05
MID1IP1	0.513892	4.74912	22.0612	2.64e-06	2.59e-05
TNK2	0.628783	4.5491	22.0549	2.65e-06	2.6e-05
LPCAT2	0.469072	5.13451	22.0493	2.66e-06	2.6e-05
CLMP	-0.345037	7.85064	22.0335	2.68e-06	2.62e-05
QTRT1	0.643831	4.10489	21.9979	2.73e-06	2.67e-05
ARAP3	0.471497	4.74295	21.9815	2.75e-06	2.69e-05
HNMT	-0.516686	4.56992	21.9545	2.79e-06	2.73e-05
DVL1	0.617191	4.988	21.9348	2.82e-06	2.75e-05
BPGM	0.442215	5.40248	21.9303	2.83e-06	2.76e-05
BCL2	0.980739	1.13811	21.9238	2.84e-06	2.76e-05
AOX1	-0.496358	4.31751	21.9108	2.86e-06	2.78e-05
RAB13	-0.31829	7.71367	21.9098	2.86e-06	2.78e-05
EIF5A2	-0.531621	5.18053	21.886	2.89e-06	2.81e-05
FILIP1	-1.66272	0.0905553	21.8824	2.9e-06	2.82e-05
TOB1	-0.389933	5.715	21.8813	2.9e-06	2.82e-05
DUSP7	0.383537	5.41779	21.8664	2.92e-06	2.84e-05
WNT16	-0.663641	4.00174	21.8537	2.94e-06	2.85e-05
FHL3	0.551013	4.95385	21.8247	2.99e-06	2.89e-05
ZMPSTE24	-0.369193	6.76699	21.8182	3e-06	2.9e-05
EEF1A2	-0.907501	2.46465	21.7833	3.05e-06	2.95e-05
ARMC9	-0.382052	5.94697	21.7752	3.07e-06	2.96e-05
GDNF	0.689709	3.09348	21.7705	3.07e-06	2.97e-05
RNF187	0.476429	6.21886	21.7546	3.1e-06	2.99e-05
DGKD	0.489525	3.93406	21.7279	3.14e-06	3.03e-05
SRRT	0.377713	6.24242	21.7157	3.16e-06	3.05e-05
FGF2	-0.411583	8.4624	21.6839	3.21e-06	3.1e-05
LEPREL4	0.462691	5.72927	21.6737	3.23e-06	3.11e-05
CCDC8	0.622506	3.85086	21.6412	3.29e-06	3.16e-05
RRM2B	-0.448505	7.06838	21.628	3.31e-06	3.18e-05
ATF3	-0.612709	3.56566	21.6159	3.33e-06	3.2e-05
DNAH7	-1.33082	0.234047	21.6122	3.34e-06	3.2e-05
OXR1	-0.443008	5.85046	21.593	3.37e-06	3.23e-05
SIK2	-0.434719	5.55826	21.5898	3.38e-06	3.23e-05
CPQ	-0.358203	6.10195	21.5648	3.42e-06	3.27e-05
DYNLT3	-0.431043	6.8667	21.5577	3.43e-06	3.28e-05
DTX3	0.518775	4.82013	21.5407	3.46e-06	3.31e-05
PACS2	0.46457	5.2924	21.5358	3.47e-06	3.32e-05
CXCL12	-0.584227	7.42612	21.5188	3.5e-06	3.34e-05
CPE	0.499219	5.08223	21.5175	3.51e-06	3.34e-05
ZNF496	0.561787	3.46177	21.5132	3.51e-06	3.35e-05
PAPLN	-0.610074	3.50372	21.4991	3.54e-06	3.37e-05
RRP9	0.620999	3.66048	21.4892	3.56e-06	3.39e-05
PACS1	0.39101	6.49099	21.4858	3.56e-06	3.39e-05
MYBPH	-1.36998	0.642224	21.4687	3.6e-06	3.42e-05
ZNF205	0.918316	2.46352	21.4185	3.69e-06	3.51e-05
PRDM1	0.457619	4.42936	21.3884	3.75e-06	3.56e-05
ANXA1	-0.351975	9.58742	21.387	3.75e-06	3.56e-05
RNF141	-0.439344	6.0885	21.3741	3.78e-06	3.58e-05
CDC14B	-0.432247	5.34997	21.3327	3.86e-06	3.66e-05
NCK1	-0.400197	5.83099	21.2889	3.95e-06	3.74e-05
ZNF449	-0.515372	4.37129	21.2707	3.99e-06	3.77e-05
NETO1	-0.578254	2.99199	21.2595	4.01e-06	3.79e-05
TRIM41	0.519175	5.03407	21.2448	4.04e-06	3.81e-05
DVL2	0.520288	4.77254	21.2443	4.04e-06	3.81e-05
INTS10	-0.367089	5.86983	21.2326	4.07e-06	3.83e-05
SNTB2	-0.417374	6.87466	21.2287	4.08e-06	3.84e-05
CAMTA2	0.485204	5.81394	21.2258	4.08e-06	3.84e-05
SPATA18	-0.405299	5.73104	21.2176	4.1e-06	3.86e-05
CTPS	0.379823	5.92234	21.1898	4.16e-06	3.91e-05
TMEM130	0.642014	2.45516	21.185	4.17e-06	3.92e-05
HSD17B10	0.527301	4.61387	21.1787	4.18e-06	3.93e-05
CCDC85A	1.87182	-0.262517	21.1749	4.19e-06	3.93e-05
AHI1	-0.540932	5.29784	21.1575	4.23e-06	3.97e-05
TSPAN2	1.01401	2.16603	21.1453	4.26e-06	3.99e-05
UHRF1BP1	0.491115	4.86291	21.1343	4.28e-06	4.01e-05
WIPF1	0.374592	5.92811	21.1325	4.29e-06	4.01e-05
IER2	0.515574	5.03876	21.1229	4.31e-06	4.03e-05
POLR2G	0.402015	5.26434	21.1199	4.31e-06	4.03e-05
IMPAD1	-0.356507	7.73546	21.0652	4.44e-06	4.14e-05
SLC6A9	0.631225	4.77668	21.0579	4.46e-06	4.16e-05
SOCS5	-0.342223	7.43168	21.0183	4.55e-06	4.24e-05
CHURC1	-0.414316	6.20884	21.0162	4.55e-06	4.24e-05
NUDT1	0.714734	2.55005	21.0159	4.55e-06	4.24e-05
SLC25A36	-0.356972	6.2063	21.0131	4.56e-06	4.24e-05
PSMG3	0.487742	3.60419	21.0089	4.57e-06	4.25e-05
SRPK1	-0.339562	6.65993	20.9958	4.6e-06	4.27e-05
SGCB	-0.383599	7.88612	20.9624	4.68e-06	4.35e-05
RPSAP52	0.932076	1.91989	20.96	4.69e-06	4.35e-05
PNRC1	-0.487623	6.17924	20.9577	4.7e-06	4.35e-05
PTBP1	0.336296	7.42502	20.9373	4.75e-06	4.39e-05
TBC1D16	0.549918	3.82137	20.9134	4.81e-06	4.45e-05
ARHGEF18	0.43958	4.95923	20.8854	4.88e-06	4.51e-05
KCNJ2-AS1	-1.39717	1.38409	20.877	4.9e-06	4.52e-05
HDAC7	0.473804	6.48124	20.8766	4.9e-06	4.52e-05
GNB3	0.640945	3.03701	20.8533	4.96e-06	4.58e-05
EHMT2	0.600717	5.19743	20.8058	5.08e-06	4.69e-05
AXL	0.318733	7.91872	20.7902	5.12e-06	4.72e-05
RAB27A	-0.448411	4.98558	20.7845	5.14e-06	4.73e-05
CREB3L1	0.365563	7.20195	20.7626	5.2e-06	4.78e-05
ATP8B2	-0.358421	7.44159	20.7019	5.37e-06	4.93e-05
YPEL3	0.4759	4.66169	20.6832	5.42e-06	4.98e-05
BRD4	0.36414	5.87476	20.6694	5.46e-06	5.01e-05
SLC6A8	0.491889	4.60699	20.6676	5.46e-06	5.01e-05
TP53INP2	-0.40093	5.99972	20.6675	5.46e-06	5.01e-05
LIMK1	0.518395	6.00143	20.6609	5.48e-06	5.02e-05
PRR16	-0.439561	4.74177	20.6426	5.54e-06	5.07e-05
ANKRD13B	0.823293	2.03086	20.6382	5.55e-06	5.08e-05
2004-03-01	0.473217	5.07595	20.6337	5.56e-06	5.08e-05
CYTH2	0.45347	6.09123	20.6285	5.58e-06	5.1e-05
CASP12	-1.75583	-0.50758	20.6162	5.61e-06	5.12e-05
FOSL1	0.410514	6.35696	20.5894	5.69e-06	5.19e-05
WTAP	-0.374966	7.77833	20.5646	5.77e-06	5.26e-05
KCNMB4	0.969102	1.62326	20.5454	5.82e-06	5.31e-05
SCN5A	-1.10567	1.26872	20.5357	5.85e-06	5.33e-05
IL6R	-0.797861	2.25419	20.52	5.9e-06	5.37e-05
POC1B	-0.449502	4.87042	20.5152	5.92e-06	5.38e-05
FAM18B1	-0.451173	5.55627	20.4873	6e-06	5.45e-05
FLNA	0.488319	10.9887	20.4735	6.05e-06	5.49e-05
ALYREF	0.434797	4.6895	20.4732	6.05e-06	5.49e-05
DSTN	-0.377715	9.85092	20.4517	6.12e-06	5.55e-05
PIK3CD	0.453776	5.41449	20.4443	6.14e-06	5.56e-05
CMAHP	-0.744059	3.16943	20.4371	6.16e-06	5.58e-05
TCEA2	0.517378	4.14478	20.4335	6.17e-06	5.59e-05
KLF9	-0.34502	5.9218	20.4218	6.21e-06	5.62e-05
GSPT1	-0.3098	7.69405	20.3996	6.28e-06	5.68e-05
FAM108A1	0.621412	4.59821	20.3928	6.31e-06	5.7e-05
TRPC1	-0.47665	4.4714	20.3676	6.39e-06	5.77e-05
C9orf16	0.656337	3.98356	20.3338	6.5e-06	5.87e-05
IARS	0.305286	8.21401	20.3045	6.6e-06	5.95e-05
ZC3H12C	-0.458856	5.16392	20.3033	6.61e-06	5.95e-05
LIMS1	0.440572	6.41895	20.2849	6.67e-06	6e-05
PPP1R35	0.688606	3.03754	20.2758	6.7e-06	6.03e-05
JPH2	0.523093	4.65688	20.259	6.76e-06	6.07e-05
COL3A1	0.358361	11.369	20.2589	6.76e-06	6.07e-05
LOC729683	1.15968	0.93011	20.2574	6.77e-06	6.07e-05
RUNX1	0.381	6.65891	20.2456	6.81e-06	6.1e-05
FAM89B	0.553254	4.43788	20.2454	6.81e-06	6.1e-05
ARHGAP33	0.905674	1.93103	20.2349	6.85e-06	6.13e-05
CAT	-0.337535	6.2253	20.222	6.9e-06	6.17e-05
HADHB	-0.315883	7.19315	20.2055	6.96e-06	6.22e-05
GOLGA4	-0.439246	7.86848	20.198	6.98e-06	6.24e-05
C7orf10	0.573417	4.12417	20.1682	7.09e-06	6.33e-05
WTIP	0.526404	3.833	20.1598	7.12e-06	6.36e-05
KIF3A	-0.441927	4.68227	20.1407	7.19e-06	6.42e-05
GAD1	-0.925798	1.40828	20.1392	7.2e-06	6.42e-05
RCN3	0.48473	5.6272	20.1187	7.28e-06	6.48e-05
NOP2	0.433395	5.13295	20.1165	7.29e-06	6.49e-05
AGRN	0.676961	8.13428	20.1141	7.3e-06	6.49e-05
ARMCX3	-0.33087	7.63273	20.1085	7.32e-06	6.5e-05
ETFA	-0.329432	6.81844	20.1007	7.35e-06	6.53e-05
LRP4	0.577914	3.23212	20.0914	7.38e-06	6.55e-05
KRR1	-0.412205	4.91396	20.0857	7.4e-06	6.57e-05
SC5DL	-0.434621	6.30578	20.0789	7.43e-06	6.59e-05
THAP11	0.458413	4.28577	20.0674	7.48e-06	6.62e-05
GLTP	-0.38475	6.02284	20.0645	7.49e-06	6.63e-05
ARHGEF7	-0.328461	6.41126	20.0223	7.65e-06	6.77e-05
KAT2A	0.473056	5.71026	19.9656	7.88e-06	6.97e-05
MIR155HG	0.961113	2.08791	19.96	7.91e-06	6.99e-05
NEDD4	-0.343113	7.43983	19.9557	7.93e-06	6.99e-05
FBLN1	-0.483996	10.8284	19.9551	7.93e-06	6.99e-05
TNFRSF10C	-0.612141	3.3387	19.954	7.93e-06	6.99e-05
BAK1	0.472987	4.20556	19.9418	7.98e-06	7.03e-05
IPO4	0.5334	4.82013	19.906	8.13e-06	7.16e-05
CIZ1	0.449386	6.25296	19.8892	8.21e-06	7.22e-05
ADAMTS2	0.369122	6.22001	19.8877	8.21e-06	7.22e-05
ENPP4	-1.32027	0.973456	19.8655	8.31e-06	7.3e-05
OPTN	-0.286986	8.18334	19.8563	8.35e-06	7.33e-05
PRX	0.728423	2.41691	19.8359	8.44e-06	7.41e-05
BANF1	0.376967	6.1271	19.8292	8.47e-06	7.43e-05
PATZ1	0.568684	4.08665	19.8182	8.52e-06	7.46e-05
TMEM161A	0.694452	3.91965	19.8122	8.54e-06	7.48e-05
FRAS1	1.08351	1.13278	19.8019	8.59e-06	7.52e-05
UGGT2	-0.39006	6.52459	19.7961	8.62e-06	7.54e-05
DST	-0.468811	8.67081	19.7868	8.66e-06	7.57e-05
PRKAA1	-0.381651	7.03215	19.7768	8.7e-06	7.6e-05
TMED4	-0.360847	5.74471	19.7748	8.71e-06	7.61e-05
TROAP	0.688635	2.94263	19.7686	8.74e-06	7.62e-05
IVL	-1.8522	0.301892	19.7489	8.83e-06	7.7e-05
BIRC5	0.443397	4.52308	19.7429	8.86e-06	7.72e-05
TGFB1	0.526037	6.21257	19.6843	9.13e-06	7.95e-05
SCAF1	0.523709	5.46402	19.6823	9.14e-06	7.96e-05
TWF2	0.541653	5.51243	19.6743	9.18e-06	7.98e-05
FAM115C	-0.709952	2.54661	19.6639	9.23e-06	8.02e-05
C6orf108	0.542634	3.72807	19.6501	9.3e-06	8.08e-05
SLC47A1	-1.35373	0.964813	19.6472	9.31e-06	8.08e-05
CIC	0.550555	5.27788	19.6379	9.36e-06	8.12e-05
SEC22B	-0.32323	7.89043	19.6366	9.37e-06	8.12e-05
GFM2	-0.3567	6.16024	19.6011	9.54e-06	8.26e-05
NASP	0.350078	5.98837	19.565	9.72e-06	8.41e-05
DOHH	0.912011	2.2951	19.5598	9.75e-06	8.43e-05
GARS	0.314618	8.30909	19.5597	9.75e-06	8.43e-05
IRF2BP1	0.723694	3.31239	19.5568	9.77e-06	8.43e-05
TRAF4	0.438201	5.06085	19.5447	9.83e-06	8.48e-05
MUS81	0.507711	4.66253	19.5405	9.85e-06	8.5e-05
ZNF654	-0.496531	4.58637	19.5377	9.86e-06	8.5e-05
TIAM1	0.837157	1.44191	19.5191	9.96e-06	8.58e-05
TET3	0.491945	3.82633	19.5166	9.97e-06	8.59e-05
MUM1	0.453956	4.85808	19.5152	9.98e-06	8.59e-05
CCBL2	-0.450175	5.04836	19.4783	1.02e-05	8.75e-05
STRADB	-0.450686	5.87432	19.4497	1.03e-05	8.87e-05
FAM171B	-0.494197	4.06439	19.4175	1.05e-05	9.02e-05
LSM7	0.490433	4.33985	19.417	1.05e-05	9.02e-05
PTMS	0.432606	6.97042	19.4089	1.06e-05	9.05e-05
SYDE1	0.455936	5.79929	19.4024	1.06e-05	9.07e-05
ZNF775	0.962834	2.00913	19.4011	1.06e-05	9.07e-05
HSPA2	-0.400973	6.15048	19.3485	1.09e-05	9.32e-05
E4F1	0.660077	3.63936	19.3413	1.09e-05	9.35e-05
CTH	0.845108	2.24945	19.3368	1.1e-05	9.37e-05
TM9SF3	-0.333202	8.68706	19.3321	1.1e-05	9.38e-05
CLCN5	0.603705	3.09521	19.3171	1.11e-05	9.45e-05
RNF220	0.430122	5.36446	19.3129	1.11e-05	9.46e-05
NEXN	-0.435397	7.91911	19.3081	1.11e-05	9.48e-05
SCRIB	0.629072	5.21263	19.3063	1.11e-05	9.49e-05
CAD	0.451039	5.79721	19.3024	1.12e-05	9.5e-05
APIP	-0.439395	4.93531	19.2968	1.12e-05	9.52e-05
C7orf69	1.45141	0.817373	19.2937	1.12e-05	9.53e-05
MBNL2	-0.409299	6.43933	19.289	1.12e-05	9.55e-05
CETN2	-0.431627	6.01896	19.2547	1.14e-05	9.71e-05
RASA3	0.329679	6.12955	19.2505	1.15e-05	9.73e-05
C20orf27	0.619795	3.93589	19.2469	1.15e-05	9.74e-05
TIMM13	0.582381	4.61416	19.2431	1.15e-05	9.75e-05
PCGF5	-0.423001	5.983	19.2428	1.15e-05	9.75e-05
TRIM5	-0.33726	6.02769	19.239	1.15e-05	9.76e-05
TSPAN3	-0.304102	7.5222	19.2386	1.15e-05	9.76e-05
PPP1R26	0.483063	4.04011	19.1948	1.18e-05	9.98e-05
FBXL19	0.585697	4.12387	19.1887	1.18e-05	0.000100033
AMPD3	-0.31069	6.65045	19.1815	1.19e-05	0.000100345
CCNF	0.674211	3.2409	19.1221	1.23e-05	0.000103452
KTN1	-0.361469	8.44209	19.1185	1.23e-05	0.00010358
PRIC285	0.671093	4.67865	19.1028	1.24e-05	0.000104362
NEFL	1.01633	2.02802	19.1017	1.24e-05	0.000104362
IL24	-1.04317	0.71972	19.0809	1.25e-05	0.000105437
AK4	-0.605523	3.74393	19.0619	1.27e-05	0.000106358
TMTC3	-0.372944	6.40096	19.0618	1.27e-05	0.000106358
RPUSD3	0.58543	3.67501	19.0539	1.27e-05	0.000106734
ATP1A1	-0.307512	8.24814	19.0509	1.27e-05	0.00010683
MRPS26	0.51959	3.73464	19.0414	1.28e-05	0.000107296
CEMP1	1.06669	1.1129	19.0139	1.3e-05	0.000108786
SHC4	-0.681057	2.55189	19.0052	1.3e-05	0.000109212
CAB39	-0.316058	7.5245	18.985	1.32e-05	0.0001103
TADA3	0.391939	6.05692	18.9815	1.32e-05	0.000110432
IQGAP3	0.486581	4.67853	18.9727	1.33e-05	0.000110874
TFPT	0.668337	2.97259	18.9688	1.33e-05	0.000111029
CSNK1G2	0.453379	5.48083	18.9558	1.34e-05	0.000111717
ZDHHC13	-0.452394	4.36851	18.9524	1.34e-05	0.000111845
PSPH	0.489732	4.19952	18.944	1.35e-05	0.000112269
TRIM8	0.434522	6.63572	18.9409	1.35e-05	0.00011238
TMEM121	1.26825	0.58648	18.9359	1.35e-05	0.000112601
KIF2C	0.510769	4.41246	18.9217	1.36e-05	0.000113374
LBH	0.354949	5.63621	18.9107	1.37e-05	0.000113952
C19orf48	0.692023	4.30851	18.9088	1.37e-05	0.000113998
BLVRA	-0.386782	5.25085	18.8885	1.39e-05	0.000115144
C21orf91	-0.448706	5.18378	18.8865	1.39e-05	0.00011519
LOC100132891	0.543054	4.13611	18.8807	1.39e-05	0.000115469
STAG2	-0.372772	6.84907	18.8769	1.39e-05	0.000115625
RUVBL2	0.411526	5.37546	18.8709	1.4e-05	0.000115913
TTLL12	0.532723	4.29101	18.8683	1.4e-05	0.000116
BCOR	0.388155	4.8676	18.8554	1.41e-05	0.000116712
FAM91A1	-0.339569	6.58324	18.8475	1.42e-05	0.000117124
OSR2	-0.486493	3.71851	18.8447	1.42e-05	0.000117223
TANK	-0.395891	6.10625	18.8421	1.42e-05	0.00011731
AKAP12	-0.292941	7.44887	18.8347	1.43e-05	0.000117691
STK38	-0.331097	6.95691	18.826	1.43e-05	0.000118152
EPGN	-2.33639	-0.314124	18.8131	1.44e-05	0.000118879
ECI1	0.57137	4.3063	18.8096	1.44e-05	0.000119022
REXO1	0.578913	4.05402	18.7883	1.46e-05	0.000120253
PRDX3	-0.315276	7.66639	18.7876	1.46e-05	0.000120253
CSK	0.482261	4.83708	18.7843	1.46e-05	0.000120386
WHSC1	0.33034	6.5201	18.776	1.47e-05	0.000120834
MTRNR2L10	-0.665768	4.23351	18.7353	1.5e-05	0.000123301
KLHL29	-0.366416	5.18682	18.7351	1.5e-05	0.000123301
AP1S3	-0.786245	1.84818	18.7283	1.51e-05	0.00012366
HSD17B4	-0.301349	6.91791	18.7183	1.52e-05	0.000124232
RAB6B	-0.66383	2.52998	18.648	1.57e-05	0.00012882
POLD2	0.498092	5.2953	18.6431	1.58e-05	0.00012907
PPRC1	0.394149	5.69911	18.6293	1.59e-05	0.000129924
SLC9A3R2	0.589947	4.7651	18.6256	1.59e-05	0.0001301
ULK3	0.468485	3.98569	18.6094	1.6e-05	0.000131129
B3GALT6	0.467942	4.32392	18.5885	1.62e-05	0.000132485
NUP62	0.481895	5.47763	18.5798	1.63e-05	0.000133013
GSTO1	-0.307347	7.07944	18.5633	1.64e-05	0.000134087
ULK1	0.511867	5.3273	18.549	1.66e-05	0.000135014
PKN1	0.480988	5.61349	18.5458	1.66e-05	0.00013515
LOC100507632	-0.515521	3.61032	18.5414	1.66e-05	0.000135379
FAM167A	-0.408848	4.86336	18.5294	1.67e-05	0.000136154
GNA14	-1.22658	0.594486	18.5175	1.68e-05	0.00013692
AEBP2	-0.367926	5.34866	18.5067	1.69e-05	0.00013761
IVNS1ABP	0.450515	6.30178	18.5036	1.7e-05	0.000137749
LIG1	0.52474	3.61476	18.4929	1.71e-05	0.000138441
HIST1H2BD	-0.53154	4.13009	18.4886	1.71e-05	0.00013867
QRICH2	0.843811	1.87213	18.4795	1.72e-05	0.00013924
ASTN2	0.541107	3.53805	18.468	1.73e-05	0.000139997
SBDS	-0.358187	7.30736	18.466	1.73e-05	0.000140062
TRANK1	-0.386009	5.54462	18.4625	1.73e-05	0.000140234
DCBLD2	-0.340628	8.24757	18.4567	1.74e-05	0.00014057
RBM15B	0.363209	5.86747	18.4461	1.75e-05	0.000141271
ECM1	-0.38448	7.32108	18.4432	1.75e-05	0.000141395
SAV1	-0.338342	6.04497	18.4393	1.75e-05	0.0001416
ITM2B	-0.324806	9.13846	18.4082	1.78e-05	0.000143837
UBE2E1	-0.350287	7.20361	18.3882	1.8e-05	0.00014527
ATF6	-0.338875	6.53232	18.3794	1.81e-05	0.000145852
RPS19BP1	0.426046	4.7904	18.3604	1.83e-05	0.000147223
LAMP2	-0.312066	8.4796	18.3572	1.83e-05	0.000147377
CCNL1	-0.340649	6.37496	18.3216	1.87e-05	0.000150067
ANKRD12	-0.511721	5.62974	18.3196	1.87e-05	0.000150129
FLJ44511	1.11437	0.912533	18.3181	1.87e-05	0.000150156
EPHA2	0.467833	6.02868	18.3069	1.88e-05	0.00015095
ZNF254	-0.497692	3.82771	18.285	1.9e-05	0.000152605
C1orf9	-0.389007	6.33505	18.2673	1.92e-05	0.000153936
AASS	-0.433854	4.45727	18.234	1.95e-05	0.000156551
MALAT1	-0.411539	9.04834	18.2325	1.96e-05	0.000156576
LHFPL2	-0.343018	5.59452	18.2303	1.96e-05	0.000156665
APOL1	-0.696982	2.20825	18.2271	1.96e-05	0.000156828
KDELR2	-0.268405	9.0723	18.2225	1.97e-05	0.000157113
TMEM173	0.404579	6.34771	18.2197	1.97e-05	0.000157247
CAPZA2	-0.366162	7.82107	18.2134	1.97e-05	0.000157674
KIRREL	0.406903	6.39748	18.2083	1.98e-05	0.000157999
LMBR1	-0.346567	5.65691	18.2038	1.98e-05	0.000158276
KRIT1	-0.404714	5.82121	18.1622	2.03e-05	0.000161672
PTPLAD1	-0.310761	7.37183	18.1607	2.03e-05	0.000161702
TDP2	-0.410414	5.8473	18.1582	2.03e-05	0.000161814
FMNL2	-0.332334	6.2791	18.1385	2.05e-05	0.000163399
PLCB1	-0.506086	4.34491	18.1302	2.06e-05	0.000164019
SPHKAP	0.855694	1.33176	18.1045	2.09e-05	0.000166139
PAMR1	-0.369346	7.65013	18.0997	2.1e-05	0.000166462
IL13RA1	-0.355378	7.60345	18.0865	2.11e-05	0.00016752
WDR78	-0.635094	3.10709	18.0728	2.13e-05	0.000168592
CNIH	-0.362514	7.25328	18.072	2.13e-05	0.000168592
PSG9	-1.16231	1.09914	18.0588	2.14e-05	0.000169661
HSPA5	-0.303526	10.2697	18.0495	2.15e-05	0.000170393
RGS5	-0.600394	3.14211	18.0478	2.15e-05	0.000170443
SYPL1	-0.312433	7.05491	18.0466	2.16e-05	0.000170447
TMEM50A	-0.28666	7.27361	18.0383	2.17e-05	0.000171084
LENG8	0.476974	7.13965	18.0263	2.18e-05	0.000172063
HECA	-0.386705	5.47151	18.0224	2.18e-05	0.000172316
PDZD4	1.45823	0.168876	17.9898	2.22e-05	0.000175181
TAF6	0.486282	5.4239	17.9818	2.23e-05	0.00017582
UHRF1BP1L	-0.43851	5.37099	17.9782	2.23e-05	0.000176046
F10	-0.450814	5.17517	17.976	2.24e-05	0.000176146
APOE	0.989455	2.09055	17.9669	2.25e-05	0.000176881
ANXA11	-0.351458	7.54213	17.9645	2.25e-05	0.000176998
C19orf26	0.765732	1.94105	17.9611	2.25e-05	0.000177208
SIAH2	0.401993	4.79658	17.9444	2.27e-05	0.000178554
HIST2H2BE	-0.406112	5.19175	17.9444	2.27e-05	0.000178554
BCO2	-1.11125	0.98454	17.94	2.28e-05	0.000178847
WBP5	-0.407481	7.34203	17.939	2.28e-05	0.000178847
FAM8A1	-0.32438	6.42607	17.9248	2.3e-05	0.000180075
TGFBRAP1	0.454719	4.34603	17.9193	2.3e-05	0.000180494
RHOJ	0.648715	2.74626	17.8976	2.33e-05	0.000182454
L1CAM	-0.515454	8.36793	17.894	2.34e-05	0.000182684
RAPH1	-0.363718	5.67469	17.8846	2.35e-05	0.000183478
C10orf107	-1.64503	-0.0666595	17.8785	2.35e-05	0.000183959
RALB	-0.321047	6.77375	17.8743	2.36e-05	0.000184257
NCKAP5L	0.539995	4.8444	17.8642	2.37e-05	0.000185132
TCTN3	-0.310421	6.35496	17.8533	2.39e-05	0.00018608
INO80E	0.608375	3.8711	17.8447	2.4e-05	0.000186812
PPARA	-0.363438	5.21858	17.8332	2.41e-05	0.000187831
ANTXR1	0.308933	9.66636	17.8228	2.42e-05	0.000188748
HS3ST3A1	0.629281	2.94618	17.8121	2.44e-05	0.0001897
PHLDA2	0.48345	4.69904	17.8108	2.44e-05	0.000189721
RNASEH2A	0.561805	3.18402	17.7987	2.46e-05	0.000190812
C11orf70	-0.703903	2.26489	17.7801	2.48e-05	0.000192579
FAM173A	0.880696	2.1855	17.7724	2.49e-05	0.000193247
HSPH1	-0.330129	7.57419	17.7595	2.51e-05	0.000194435
HDAC6	0.498883	4.76499	17.7564	2.51e-05	0.000194435
ABAT	-0.584894	3.40579	17.7563	2.51e-05	0.000194435
CXXC1	0.511807	4.59821	17.7562	2.51e-05	0.000194435
RASA2	-0.523107	4.76952	17.7299	2.55e-05	0.000196966
HMOX1	0.584414	3.76793	17.7293	2.55e-05	0.000196966
LOC344595	-0.471935	4.36156	17.7281	2.55e-05	0.00019698
HLA-E	-0.310911	8.33288	17.7115	2.57e-05	0.000198583
NCAM1	0.631865	2.24595	17.709	2.57e-05	0.000198731
MLLT1	0.417222	5.85734	17.7024	2.58e-05	0.000199305
PLEKHF1	0.800343	1.57237	17.6935	2.6e-05	0.000200118
PPTC7	-0.405239	4.82195	17.6904	2.6e-05	0.000200326
METTL8	-0.404903	4.72989	17.6854	2.61e-05	0.000200741
LOC100507053	-0.543784	3.23824	17.6544	2.65e-05	0.000203917
BCL2L13	-0.318327	6.24749	17.6504	2.65e-05	0.000204221
HPSE2	-1.21517	0.532847	17.641	2.67e-05	0.000205051
PGAM5	0.440171	4.21639	17.6405	2.67e-05	0.000205051
RBPJ	-0.328325	7.18423	17.6199	2.7e-05	0.000207167
PTK2	-0.3212	6.93938	17.5991	2.73e-05	0.00020932
B3GNT2	-0.429406	4.44083	17.5806	2.75e-05	0.000211244
HSPB1	0.541398	7.84836	17.5728	2.77e-05	0.000211989
ZNF238	-0.491113	4.36128	17.5625	2.78e-05	0.000213005
SAMD5	0.520498	4.42221	17.5603	2.78e-05	0.000213132
PLEC	0.549124	8.13736	17.5558	2.79e-05	0.000213513
C16orf52	-0.408514	4.99341	17.5464	2.8e-05	0.00021444
INMT	-1.41406	0.579273	17.537	2.82e-05	0.000215378
RPL18A	0.401099	8.96888	17.5326	2.82e-05	0.000215759
IFT80	-0.382061	6.55913	17.5289	2.83e-05	0.000216045
FAM129A	0.369688	6.06765	17.525	2.84e-05	0.00021637
SNAPC2	0.632129	3.62666	17.5223	2.84e-05	0.00021655
BHMT2	-0.462966	4.57492	17.5168	2.85e-05	0.000217055
C8orf47	-1.16987	1.34518	17.5123	2.85e-05	0.000217439
AP1S2	-0.473753	4.99984	17.5104	2.86e-05	0.000217525
AKNA	0.635932	3.93336	17.4981	2.88e-05	0.000218776
SIRPA	-0.328917	6.87784	17.4973	2.88e-05	0.000218776
TNFRSF1B	-0.607366	2.71166	17.4884	2.89e-05	0.00021968
R3HCC1	0.456772	4.1977	17.4674	2.92e-05	0.000221988
PRRC2A	0.394351	7.69361	17.4623	2.93e-05	0.000222459
MCRS1	0.424165	4.84476	17.4583	2.94e-05	0.00022279
PCDH10	1.67559	0.410976	17.4572	2.94e-05	0.000222797
CLASRP	0.514349	4.11356	17.4443	2.96e-05	0.000224183
ELTD1	0.582069	3.25435	17.4425	2.96e-05	0.000224267
LMOD1	-0.330618	7.42052	17.437	2.97e-05	0.000224783
HLA-DMA	-0.852439	2.02654	17.4322	2.98e-05	0.000225225
ZMIZ2	0.478119	5.90544	17.3776	3.06e-05	0.000231647
CDC34	0.503174	5.16278	17.3512	3.11e-05	0.000234756
USP33	-0.356213	6.77956	17.3476	3.11e-05	0.000235071
EXOC6	-0.476323	4.89949	17.3411	3.12e-05	0.000235733
POLRMT	0.770019	4.12975	17.325	3.15e-05	0.000237607
RGMA	1.38966	-0.010156	17.2948	3.2e-05	0.000241228
BTBD1	-0.334127	7.41022	17.294	3.2e-05	0.000241228
BAHCC1	0.522858	4.35893	17.2769	3.23e-05	0.000243272
MDGA1	0.728023	2.09675	17.2706	3.24e-05	0.000243942
ACBD3	-0.321319	6.7391	17.24	3.29e-05	0.000247757
LINC00346	-0.737186	2.28249	17.2387	3.3e-05	0.000247791
LUST	-0.491867	3.91875	17.2325	3.31e-05	0.000248451
ALDH1L2	0.36011	7.68686	17.2264	3.32e-05	0.000249105
LRRFIP2	-0.347686	7.02498	17.2242	3.32e-05	0.000249254
SLC44A1	-0.321841	6.36264	17.2221	3.33e-05	0.000249394
DPH3	-0.325548	6.63988	17.2149	3.34e-05	0.000250196
LOC100506190	0.618849	3.29749	17.2116	3.34e-05	0.000250488
ECI2	-0.315565	5.83763	17.2063	3.35e-05	0.000250915
IDI1	-0.435319	6.07906	17.2062	3.35e-05	0.000250915
GRAMD4	0.578255	3.36427	17.1915	3.38e-05	0.000252711
MYBL1	-0.411606	6.01798	17.189	3.38e-05	0.000252902
S1PR5	1.48314	-0.342072	17.187	3.39e-05	0.00025302
NDUFA4L2	1.62291	-0.383869	17.1769	3.41e-05	0.000254229
USF2	0.367795	5.53826	17.1679	3.42e-05	0.000255294
NDUFS6	0.382577	4.62894	17.1644	3.43e-05	0.00025561
RAD23B	-0.309299	8.62772	17.148	3.46e-05	0.000257692
TRIM3	0.548569	3.76293	17.1409	3.47e-05	0.000258503
GRIK2	-0.491021	4.63917	17.13	3.49e-05	0.000259847
THRA	0.428547	4.90496	17.1276	3.5e-05	0.000260032
SENP2	-0.358356	5.79747	17.1244	3.5e-05	0.000260216
FKBP4	0.329936	5.55147	17.124	3.5e-05	0.000260216
DNMT1	0.323842	6.25178	17.0988	3.55e-05	0.000263545
CCDC104	-0.448476	5.20182	17.0964	3.55e-05	0.00026373
NFKBIL1	0.610014	3.07153	17.0948	3.56e-05	0.0002638
PPAPDC1B	-0.335386	6.10617	17.078	3.59e-05	0.000265872
SLC5A3	-0.402964	6.84302	17.0778	3.59e-05	0.000265872
GPR124	0.350584	8.05685	17.0743	3.59e-05	0.000266223
MLXIP	0.445197	4.94484	17.0569	3.63e-05	0.000268514
ITGB3	-0.330174	5.78476	17.054	3.63e-05	0.000268771
TGFB1I1	0.412623	6.35845	17.0449	3.65e-05	0.000269906
CEBPD	-0.465886	5.95605	17.0264	3.69e-05	0.000272401
FAM13B	-0.339074	6.43244	17.0199	3.7e-05	0.000273183
UBN1	0.349273	5.72543	17.0164	3.71e-05	0.000273527
FBXL22	1.66743	-0.275632	17.0114	3.72e-05	0.000274104
SKP1	-0.341639	8.62187	17.0047	3.73e-05	0.000274916
DDX51	0.526001	3.44022	16.9939	3.75e-05	0.000276326
DOCK7	-0.338738	7.10851	16.9801	3.78e-05	0.000278185
TSNAX	-0.40928	5.21774	16.9788	3.78e-05	0.000278214
MC1R	0.655472	2.28884	16.9708	3.8e-05	0.000279236
CLDN11	-0.303371	9.13769	16.95	3.84e-05	0.000282047
ADARB1	-0.354789	5.51181	16.9496	3.84e-05	0.000282047
NDOR1	0.618892	4.0313	16.9466	3.84e-05	0.000282336
PKMYT1	0.797175	1.84218	16.9343	3.87e-05	0.00028401
MRPL41	0.566445	4.33746	16.9242	3.89e-05	0.000285376
CEP70	-0.573816	4.24747	16.9197	3.9e-05	0.000285841
PTGIR	0.547538	3.46152	16.919	3.9e-05	0.000285841
RAB8B	-0.356078	6.28649	16.9023	3.94e-05	0.000288171
MKL2	-0.425675	4.76913	16.9014	3.94e-05	0.000288171
TRIM16	0.396685	4.98142	16.899	3.94e-05	0.000288382
ZBTB33	-0.391899	5.36228	16.8813	3.98e-05	0.000290913
C12orf75	-0.277133	8.97962	16.8696	4e-05	0.000292557
PRKCDBP	0.4199	6.10838	16.8662	4.01e-05	0.000292909
CMPK1	-0.352421	7.90591	16.8535	4.04e-05	0.000294711
MID2	-0.442327	4.4727	16.8483	4.05e-05	0.000295216
ZNF628	0.875	1.08698	16.8482	4.05e-05	0.000295216
ZBTB12	0.621261	2.41832	16.8456	4.05e-05	0.000295455
ARSI	0.677102	3.66908	16.8415	4.06e-05	0.000295924
CDCA8	0.490799	3.88773	16.8393	4.07e-05	0.000296111
MPRIP	0.2842	7.58981	16.8364	4.07e-05	0.000296311
TAF13	-0.449033	5.16176	16.8348	4.08e-05	0.000296311
TERF1	-0.38921	5.41303	16.8348	4.08e-05	0.000296311
PRR14	0.436501	4.55839	16.8246	4.1e-05	0.000297719
C10orf46	-0.346323	5.88407	16.8237	4.1e-05	0.000297719
CCDC50	-0.344999	7.73274	16.8155	4.12e-05	0.000298846
SLC2A10	-0.312217	6.45763	16.7814	4.19e-05	0.000304057
KSR1	0.543128	3.33434	16.7806	4.2e-05	0.000304057
UCHL3	-0.447807	5.08728	16.7711	4.22e-05	0.000305403
ALDH3A1	-1.12432	3.16262	16.7596	4.24e-05	0.000306979
PROCR	-0.45133	4.53341	16.7593	4.24e-05	0.000306979
PPARGC1A	-0.568255	2.88419	16.7488	4.27e-05	0.00030851
ZNF428	0.471992	3.46922	16.747	4.27e-05	0.000308627
ARID4B	-0.381824	6.02163	16.7452	4.27e-05	0.00030875
CASC4	-0.325844	7.97486	16.7331	4.3e-05	0.000310526
RBM14	0.438195	4.4954	16.7323	4.3e-05	0.000310526
CLDND1	-0.312398	6.42767	16.7173	4.34e-05	0.000312813
KIFC2	0.745464	3.57143	16.7058	4.36e-05	0.000314539
CHUK	-0.362411	5.5238	16.7001	4.38e-05	0.00031532
SYAP1	-0.355399	6.21641	16.6908	4.4e-05	0.000316693
RAP2C	-0.375427	5.65897	16.6805	4.42e-05	0.000318231
OLFML2B	0.547335	3.12244	16.6447	4.51e-05	0.00032401
USP19	0.392497	5.45315	16.6443	4.51e-05	0.00032401
ZNF610	-0.625116	2.82081	16.6326	4.54e-05	0.000325841
TBKBP1	0.59175	4.0356	16.6086	4.59e-05	0.000329809
FAM89A	-0.866039	2.13054	16.607	4.6e-05	0.000329902
HMGCS1	-0.346899	6.39687	16.6039	4.61e-05	0.000330262
GCNT1	-0.426793	4.31365	16.596	4.62e-05	0.000331463
COX17	-0.559507	3.95809	16.5893	4.64e-05	0.000332458
HNRNPUL1	0.280032	7.5809	16.567	4.7e-05	0.000336204
CLIP4	-0.352054	6.30787	16.5472	4.75e-05	0.000339539
TIMM44	0.481971	4.44875	16.5459	4.75e-05	0.000339584
SBNO2	0.502431	5.51901	16.543	4.76e-05	0.000339922
FIBP	0.395422	5.57508	16.5308	4.79e-05	0.000341924
KLC4	0.549848	3.63464	16.5241	4.8e-05	0.00034295
TMX4	-0.349043	5.26881	16.521	4.81e-05	0.000343325
SETD1A	0.409465	4.41857	16.5181	4.82e-05	0.000343671
CUL5	-0.349876	6.25323	16.4987	4.87e-05	0.000346881
TMEM106B	-0.392099	6.91275	16.4984	4.87e-05	0.000346881
OSBPL7	0.677361	3.402	16.4817	4.91e-05	0.000349749
CARD6	-0.62853	2.26813	16.4479	5e-05	0.000355846
PION	-0.468262	4.22743	16.4432	5.01e-05	0.000356553
LIMCH1	0.30887	6.32038	16.4327	5.04e-05	0.000358332
ATP11C	-0.376959	5.83486	16.4283	5.05e-05	0.000358972
TMX3	-0.337594	7.54375	16.4246	5.06e-05	0.000359472
ZDHHC7	-0.30899	6.73437	16.4219	5.07e-05	0.000359786
THRB	-0.574692	3.30097	16.411	5.1e-05	0.000361664
PGLS	0.504063	4.87258	16.4072	5.11e-05	0.000362197
SYMPK	0.423375	5.67564	16.4014	5.12e-05	0.000363121
EDA2R	-0.293499	6.33702	16.3865	5.17e-05	0.000365783
C3orf23	-0.35943	5.21835	16.3851	5.17e-05	0.000365858
MTUS1	-0.510153	2.85499	16.3796	5.18e-05	0.000366717
CPPED1	-0.358423	5.62203	16.3736	5.2e-05	0.00036749
IFT172	0.383377	4.37492	16.3736	5.2e-05	0.00036749
RECQL4	0.716973	2.91829	16.3667	5.22e-05	0.00036862
GPC6	0.515804	3.73279	16.3581	5.24e-05	0.000370108
ARHGDIA	0.458267	7.73133	16.3532	5.26e-05	0.00037086
AZI1	0.732295	2.79815	16.3496	5.27e-05	0.00037137
RSAD1	0.398704	4.67409	16.3411	5.29e-05	0.000372826
CSF1	-0.429989	7.27636	16.3381	5.3e-05	0.000373233
PHLDA3	0.551741	5.93845	16.3233	5.34e-05	0.000375946
C5orf4	-0.405841	4.66797	16.3107	5.38e-05	0.000378261
RHBDD3	0.656706	3.48294	16.3095	5.38e-05	0.000378279
NAT1	-0.635145	2.59182	16.3081	5.38e-05	0.000378361
WDR63	-0.833334	2.77605	16.3066	5.39e-05	0.000378464
TRIM36	-0.995782	1.49663	16.2865	5.44e-05	0.000382288
NCALD	0.866692	1.34257	16.2797	5.46e-05	0.000383464
C12orf23	-0.342908	8.00402	16.2744	5.48e-05	0.00038433
C19orf10	-0.319226	7.13528	16.2605	5.52e-05	0.000386943
DCPS	0.527691	3.34008	16.2436	5.57e-05	0.000390201
NPAS3	-1.1801	0.645789	16.2413	5.58e-05	0.000390477
USP54	0.504488	4.16504	16.2302	5.61e-05	0.000392365
MAOA	-1.54725	0.943345	16.2301	5.61e-05	0.000392365
MR1	-0.35192	4.8065	16.2164	5.65e-05	0.000395001
PIAS4	0.60801	3.156	16.2103	5.67e-05	0.000396068
ARFGEF1	-0.332554	6.6397	16.2069	5.68e-05	0.000396564
NDUFB7	0.596685	4.69884	16.2051	5.68e-05	0.000396729
RARRES2	0.385195	6.40782	16.1903	5.73e-05	0.000399635
FBLIM1	0.345566	7.08858	16.1853	5.74e-05	0.000400481
PPP6C	-0.293106	6.39893	16.1733	5.78e-05	0.000402816
GLB1L	-0.476763	3.60195	16.1595	5.82e-05	0.000405547
RAVER1	0.486855	5.08692	16.1557	5.83e-05	0.000406133
UCK1	0.455835	4.36571	16.1524	5.84e-05	0.000406632
SPPL2B	0.600818	4.38711	16.1403	5.88e-05	0.000408848
LYSMD3	-0.384643	5.96504	16.1401	5.88e-05	0.000408848
GAP43	1.20113	0.735884	16.1272	5.92e-05	0.000411414
FGD1	0.403834	4.8027	16.1087	5.98e-05	0.000415226
IL33	-0.508307	4.05556	16.1066	5.99e-05	0.000415478
TMEM184C	-0.308726	6.02304	16.0764	6.08e-05	0.000421931
SSNA1	0.478843	4.57247	16.073	6.09e-05	0.000422476
SNRPB	0.358791	6.26468	16.0587	6.14e-05	0.000425444
RAB40C	0.623197	3.39558	16.0561	6.15e-05	0.000425806
RNF40	0.383359	6.07499	16.0539	6.16e-05	0.000425892
CCS	0.506603	4.01582	16.0537	6.16e-05	0.000425892
TIMM50	0.456753	4.74609	16.0502	6.17e-05	0.000426463
CLIP2	0.456071	5.76745	16.0443	6.19e-05	0.000427563
NUP188	0.322155	5.95985	16.0432	6.19e-05	0.000427589
SHMT1	0.775358	1.57346	16.037	6.21e-05	0.00042875
R3HDM4	0.457247	4.76041	16.0248	6.25e-05	0.000431119
GDF5	-0.451984	4.95054	16.0246	6.25e-05	0.000431119
PHLDB1	0.376247	6.6509	16.0159	6.28e-05	0.00043289
JUN	0.327964	6.52116	16.0134	6.29e-05	0.000433229
ARFGAP1	0.440432	6.1207	15.9888	6.37e-05	0.000438669
PRR12	0.571218	4.22624	15.9854	6.38e-05	0.000439217
CAPN2	-0.260728	9.16393	15.9812	6.4e-05	0.000439962
RCOR2	0.932036	0.981173	15.9775	6.41e-05	0.000440587
C4orf49	-0.348308	5.6508	15.9765	6.41e-05	0.000440587
SIAE	-0.342899	5.54845	15.9602	6.47e-05	0.000444162
ADRM1	0.443534	5.72448	15.9588	6.47e-05	0.000444274
LZTS2	0.470988	5.67207	15.9509	6.5e-05	0.000445886
C6orf120	-0.362855	6.36981	15.9476	6.51e-05	0.000446435
ANO8	0.624647	2.69414	15.9405	6.54e-05	0.000447885
CREBBP	0.305239	6.13582	15.937	6.55e-05	0.000448471
ZEB1	-0.32681	7.75909	15.9298	6.57e-05	0.000449759
HAPLN3	0.67454	2.16167	15.9296	6.57e-05	0.000449759
WRAP73	0.521848	3.45741	15.9265	6.59e-05	0.000450258
UBTF	0.287447	6.32004	15.9218	6.6e-05	0.000451147
FDX1	-0.415018	4.39797	15.9099	6.64e-05	0.000453682
WWP1	-0.389792	5.40362	15.9092	6.65e-05	0.000453682
VPS26A	-0.324579	6.64458	15.904	6.66e-05	0.000454683
NPM3	0.516875	3.99674	15.8991	6.68e-05	0.000455637
CCDC94	0.605513	2.60506	15.8733	6.77e-05	0.000461645
COPS2	-0.341325	7.30531	15.8668	6.8e-05	0.000462986
MARCKS	0.31023	8.76261	15.8457	6.87e-05	0.000467945
IFNGR1	-0.31771	7.22876	15.8416	6.89e-05	0.000468711
TCF7	-0.627045	2.21012	15.8401	6.89e-05	0.000468831
ZNF266	-0.375349	5.38097	15.8361	6.91e-05	0.000469579
NAA10	0.342055	5.5312	15.8299	6.93e-05	0.00047087
AKAP5	0.798111	1.43779	15.8277	6.94e-05	0.00047087
SUN1	-0.278452	6.90004	15.8271	6.94e-05	0.00047087
UBA6	-0.313303	6.52188	15.827	6.94e-05	0.00047087
AGAP3	0.499481	5.13982	15.8199	6.97e-05	0.000472392
VCL	-0.253641	9.9351	15.8156	6.98e-05	0.000473233
GDF15	0.556018	5.29862	15.8095	7e-05	0.000474503
HERPUD1	0.301822	6.93901	15.7942	7.06e-05	0.000478109
TRIM32	0.328907	5.83089	15.7899	7.08e-05	0.000478957
TEAD4	0.564309	2.83988	15.7579	7.2e-05	0.000486869
CTNNBIP1	0.515689	3.73124	15.7539	7.21e-05	0.000487661
C14orf45	-0.457233	3.38215	15.7489	7.23e-05	0.0004887
RNF166	0.500978	2.9438	15.7385	7.27e-05	0.000491123
SCN9A	0.531448	4.55414	15.7312	7.3e-05	0.000492781
C6orf48	0.268444	7.2019	15.7247	7.33e-05	0.00049422
CHPF	0.548202	7.23167	15.7217	7.34e-05	0.000494755
BCL11A	1.0715	0.38739	15.7173	7.35e-05	0.000495483
ANKMY2	-0.381187	5.15675	15.7164	7.36e-05	0.000495483
DBI	-0.283669	6.45441	15.716	7.36e-05	0.000495483
HGSNAT	-0.267762	7.15947	15.7059	7.4e-05	0.000497673
APPBP2	-0.321628	6.55617	15.7057	7.4e-05	0.000497673
TBC1D15	-0.40593	5.86876	15.6968	7.43e-05	0.000499761
MTA1	0.342584	5.7911	15.6931	7.45e-05	0.000500492
BLMH	0.406298	4.97936	15.6866	7.48e-05	0.000501954
GSDMD	0.560857	4.13404	15.6703	7.54e-05	0.000506047
ACD	0.61627	3.09174	15.658	7.59e-05	0.000509073
ZNF282	0.517372	4.32492	15.6517	7.61e-05	0.00051052
MRPL38	0.455972	4.3227	15.6429	7.65e-05	0.000512644
BRAT1	0.654336	4.00682	15.6387	7.67e-05	0.000513512
SPSB3	0.64384	4.03578	15.6319	7.69e-05	0.000515085
USMG5	-0.396109	6.87528	15.6075	7.79e-05	0.000521508
CXCL14	-1.85668	1.07532	15.6035	7.81e-05	0.000522354
TRMT1	0.497605	4.54139	15.5949	7.85e-05	0.000524469
UPP1	0.635035	3.11394	15.5739	7.93e-05	0.000530069
NFE2L2	-0.287733	7.33904	15.5696	7.95e-05	0.000531003
YES1	-0.35006	6.7335	15.56	7.99e-05	0.00053341
OAT	-0.28572	7.71126	15.5435	8.06e-05	0.000537824
KIF16B	-0.455733	3.88918	15.5414	8.07e-05	0.00053816
ERCC1	0.342889	5.6567	15.5342	8.1e-05	0.00053993
TMEM204	0.528761	3.82312	15.533	8.11e-05	0.000539984
ATP5H	-0.315304	7.2375	15.5268	8.13e-05	0.000541489
HMGN2	0.284572	7.62836	15.5209	8.16e-05	0.000542919
PISD	-0.395858	5.35114	15.5144	8.19e-05	0.000544509
ARL2BP	-0.325604	6.69791	15.5115	8.2e-05	0.000545061
GFPT1	-0.305719	7.64083	15.509	8.21e-05	0.000545502
CMTM6	-0.341644	7.49071	15.5042	8.23e-05	0.000546615
ETV6	0.372869	5.04539	15.5014	8.24e-05	0.000547153
VPS37B	0.413839	4.92526	15.4996	8.25e-05	0.000547399
ADH5	-0.273307	8.01408	15.4974	8.26e-05	0.000547755
KLHL17	0.556501	3.56513	15.4935	8.28e-05	0.000548606
GGH	-0.451321	5.40206	15.4886	8.3e-05	0.000549744
ETFDH	-0.373433	4.94439	15.4805	8.34e-05	0.000551844
PDCD5	-0.437531	6.96414	15.4583	8.43e-05	0.000558067
JKAMP	-0.353499	6.47653	15.4567	8.44e-05	0.000558265
TLE2	1.06498	1.13736	15.4543	8.45e-05	0.000558686
NUDT16L1	0.500458	3.79833	15.4526	8.46e-05	0.000558903
WDR6	0.388222	6.17533	15.4441	8.5e-05	0.000561149
SLC6A15	-0.580365	3.22561	15.4417	8.51e-05	0.000561582
MRPL12	0.422484	4.5399	15.4391	8.52e-05	0.000561999
PCNP	-0.38166	7.83542	15.4384	8.52e-05	0.000561999
MRM1	0.799277	1.78597	15.4289	8.57e-05	0.000564534
ZFC3H1	-0.381196	7.21056	15.423	8.59e-05	0.000566014
DECR1	-0.315515	6.28394	15.4098	8.65e-05	0.000569713
EWSR1	0.321	7.53891	15.4051	8.68e-05	0.000570844
ADAMTSL4	-0.524479	4.29457	15.3965	8.71e-05	0.000573135
IMP4	0.520521	4.25856	15.3951	8.72e-05	0.000573276
DCAF6	-0.296561	7.1589	15.3894	8.75e-05	0.000574725
ARHGEF40	0.413577	6.64364	15.3839	8.77e-05	0.000576103
REEP3	-0.333014	7.10096	15.3826	8.78e-05	0.000576226
PPAPDC2	-0.442756	3.81568	15.3812	8.79e-05	0.000576375
PRDX6	0.284952	9.6831	15.3789	8.8e-05	0.000576766
ADAMTS9	-0.643365	3.52955	15.37	8.84e-05	0.000579219
WARS	0.266356	7.75027	15.3559	8.9e-05	0.000583263
[truncated: 11,095 more rows]

## Sheet: ct_IR.tags2
	logFC	logCPM	LR	PValue	FDR
OLFML3	-1.80235	7.13095	547.891	3.62e-121	4.74e-117
CXCL12	-2.99496	7.42612	478.776	3.94e-106	2.58e-102
OLFML1	-2.78831	4.26469	399.388	7.48e-89	3.27e-85
MKI67	-1.96764	5.66747	369.9	1.97e-82	6.44e-79
PTX3	-1.386	8.60106	361.699	1.2e-80	3.15e-77
IL1R1	-1.82883	7.65289	359.101	4.42e-80	9.64e-77
KIF20A	-2.02918	5.10255	354.246	5.04e-79	9.43e-76
MIAT	-2.36836	4.1149	338.827	1.15e-75	1.88e-72
LMNB1	-2.67057	4.4939	336.252	4.18e-75	6.08e-72
SYNPO2	1.59539	7.53308	332.875	2.27e-74	2.98e-71
PDGFRA	-1.28216	8.72775	331.38	4.81e-74	5.73e-71
HIST2H2BE	1.67411	5.19175	331.136	5.44e-74	5.93e-71
OLFML2A	-1.85469	6.42397	329.743	1.09e-73	1.1e-70
COL14A1	-1.75248	6.59733	328.559	1.98e-73	1.85e-70
TOP2A	-2.14123	7.18138	327.259	3.8e-73	3.32e-70
ANLN	-1.72258	6.57508	316.912	6.82e-71	5.58e-68
WNT2	-1.93698	4.99883	312.005	7.99e-70	6.15e-67
COL5A3	-1.82525	7.00271	309.562	2.72e-69	1.98e-66
SYNJ2	-1.35966	6.22406	309.086	3.45e-69	2.38e-66
LEPREL1	1.38714	6.84386	306.773	1.1e-68	7.21e-66
CCND1	1.25988	10.1189	296.572	1.84e-66	1.15e-63
BIRC5	-1.97418	4.52308	295.088	3.87e-66	2.3e-63
PTN	-1.62974	5.6257	291.033	2.96e-65	1.69e-62
CTSK	-1.20111	9.67847	289.574	6.16e-65	3.36e-62
GNG2	-2.12666	4.83229	289.464	6.51e-65	3.41e-62
CKAP2L	-2.014	4.6603	286.557	2.8e-64	1.41e-61
KIF11	-2.00845	5.04819	285.43	4.92e-64	2.39e-61
PSG5	1.49309	6.2302	285.258	5.37e-64	2.51e-61
HMGB2	-1.73486	5.72417	281.414	3.69e-63	1.67e-60
C1R	-1.50119	9.21771	280.535	5.74e-63	2.51e-60
SPAG5	-1.82259	4.65676	280.098	7.15e-63	3.02e-60
FAM46C	-2.18619	4.52467	278.446	1.64e-62	6.7e-60
MFAP4	-1.49285	7.48909	277.558	2.56e-62	1.01e-59
UBE2C	-2.33267	4.15994	277.072	3.26e-62	1.26e-59
SCUBE3	1.39253	6.6453	276.269	4.88e-62	1.83e-59
SERPINF1	-1.50439	6.58068	275.978	5.65e-62	2.05e-59
CIT	-1.76605	4.72622	275.171	8.47e-62	3e-59
HIST1H1C	2.13511	4.36238	270.529	8.7e-61	3e-58
PTGIS	-1.91747	5.39806	268.229	2.76e-60	9.26e-58
PRC1	-1.73878	5.90624	262.388	5.18e-59	1.69e-56
SERPINE1	1.16869	9.61346	260.892	1.1e-58	3.5e-56
SLFN11	-1.47194	5.40804	259.406	2.31e-58	7.21e-56
PTMA	-1.16257	8.42096	258.227	4.18e-58	1.27e-55
SOX4	-1.41499	5.28655	254.49	2.73e-57	8.11e-55
CENPF	-2.16071	5.55378	248.391	5.82e-56	1.69e-53
DLGAP5	-2.23897	4.76602	248.219	6.35e-56	1.81e-53
ZNF608	-1.59289	4.61399	246.955	1.2e-55	3.34e-53
SHCBP1	-1.81053	4.45162	243.001	8.72e-55	2.38e-52
NCAPG	-1.7635	4.5575	242.466	1.14e-54	3.01e-52
DLL4	-2.42986	4.19739	242.448	1.15e-54	3.01e-52
TMPO	-1.54377	5.88882	242.368	1.2e-54	3.08e-52
CDK1	-1.75824	5.05635	237.49	1.39e-53	3.49e-51
CPXM1	-2.24238	4.24605	237.185	1.62e-53	3.99e-51
TXNRD1	1.12985	9.77429	236.638	2.13e-53	5.16e-51
HGF	-1.50512	5.52581	236.003	2.93e-53	6.97e-51
GPM6B	-2.81441	2.8887	233.58	9.88e-53	2.31e-50
IL33	-2.14161	4.05556	233.154	1.22e-52	2.81e-50
ANKRD1	2.53976	4.17017	232.224	1.95e-52	4.41e-50
SLIT2	-1.14803	6.76087	231.655	2.6e-52	5.76e-50
IQGAP3	-1.89578	4.67853	231.222	3.23e-52	6.99e-50
MMP3	1.20081	7.75409	231.205	3.26e-52	6.99e-50
CTGF	1.33903	8.95885	228.337	1.37e-51	2.9e-49
CLSTN2	1.86033	3.7445	228.252	1.43e-51	2.98e-49
NID1	-1.00423	8.4746	228.218	1.46e-51	2.98e-49
ASPM	-2.12413	5.24769	227.603	1.99e-51	4e-49
RRM2	-1.39996	6.25106	225.876	4.73e-51	9.38e-49
LDB2	-1.39059	5.08693	223.042	1.96e-50	3.84e-48
SSTR1	1.2448	6.27866	222.836	2.18e-50	4.19e-48
TPX2	-1.40606	5.94332	219.935	9.35e-50	1.77e-47
EHD3	-1.17253	7.07166	217.178	3.73e-49	6.98e-47
MRVI1	1.05906	6.66403	215.711	7.8e-49	1.44e-46
GPSM2	-1.67931	4.35965	215.677	7.93e-49	1.44e-46
NUSAP1	-1.89595	5.03993	214.398	1.51e-48	2.71e-46
KCTD4	2.51043	3.575	212.175	4.61e-48	8.15e-46
ENC1	1.23576	6.89619	211.999	5.03e-48	8.79e-46
CCNB2	-1.9662	4.19289	210.882	8.82e-48	1.52e-45
PLK1	-1.99523	4.28594	209.998	1.37e-47	2.34e-45
NFASC	1.84726	3.92968	209.455	1.81e-47	3.03e-45
CDKN1A	1.17708	9.41308	208.797	2.51e-47	4.17e-45
CYB5R1	1.24387	6.33554	208.597	2.78e-47	4.55e-45
PHGDH	-1.43178	5.93464	208.364	3.13e-47	5.05e-45
HAS2	-2.52676	3.29506	204.543	2.13e-46	3.4e-44
PPP1R3C	1.22562	7.26306	203.719	3.22e-46	5.08e-44
KCTD20	0.990131	7.96122	202.03	7.53e-46	1.17e-43
TTK	-2.09671	4.06337	201.143	1.18e-45	1.81e-43
PBK	-1.98759	4.29934	200.702	1.47e-45	2.23e-43
NCAPH	-2.1551	3.20673	199.473	2.72e-45	4.1e-43
COL21A1	-2.55702	3.46869	198.876	3.67e-45	5.47e-43
CA12	-1.20782	5.31846	197.13	8.83e-45	1.3e-42
BTN3A2	-1.33991	4.97208	196.94	9.72e-45	1.41e-42
KIF14	-2.46695	3.83195	195.677	1.83e-44	2.64e-42
APCDD1	-1.33858	6.95607	195.387	2.12e-44	3.02e-42
CPA4	1.62422	5.11231	194.956	2.63e-44	3.71e-42
CASP1	-1.47941	4.97483	194.872	2.75e-44	3.83e-42
ASB5	1.51919	5.87464	194.265	3.73e-44	5.14e-42
AIM1	-1.37797	5.56568	193.938	4.39e-44	5.99e-42
GREM1	1.09999	11.4953	193.299	6.06e-44	8.18e-42
DCN	-1.05104	9.84865	192.606	8.58e-44	1.15e-41
OBFC2A	1.17146	7.73726	191.645	1.39e-43	1.84e-41
NIPAL3	1.19479	7.214	191.204	1.74e-43	2.27e-41
CEP55	-1.83138	4.8591	190.714	2.22e-43	2.88e-41
RCAN1	1.40702	8.11614	190.355	2.66e-43	3.41e-41
DEPDC1	-1.92114	4.5517	190.293	2.74e-43	3.49e-41
KIF2C	-1.80954	4.41246	190.171	2.92e-43	3.67e-41
SNTB1	-1.31274	4.85617	189.858	3.41e-43	4.26e-41
OLR1	1.97108	3.57395	189.127	4.93e-43	6.09e-41
IL1B	-1.00556	7.74008	188.94	5.42e-43	6.63e-41
FOXM1	-1.76252	4.65443	188.095	8.28e-43	1e-40
TPM2	1.06698	10.3927	187.046	1.4e-42	1.69e-40
TNFRSF10D	1.22092	6.75465	186.011	2.36e-42	2.81e-40
DNAJB4	1.34702	7.0781	185.535	3e-42	3.54e-40
PLK4	-2.28794	3.45344	185.351	3.29e-42	3.85e-40
CDC20	-2.11101	4.49328	184.883	4.16e-42	4.82e-40
CDCA7	-1.73548	4.25945	182.693	1.25e-41	1.44e-39
BUB1	-1.84133	4.48444	182.606	1.31e-41	1.49e-39
PBX1	-1.05989	6.64108	181.899	1.87e-41	2.11e-39
CDCA8	-1.85404	3.88773	181.073	2.83e-41	3.16e-39
WFDC1	1.11318	5.80651	180.952	3e-41	3.33e-39
SLC16A2	1.03075	6.52476	180.772	3.29e-41	3.62e-39
KIF4A	-1.87405	3.75445	180.594	3.59e-41	3.92e-39
VAT1L	-2.04199	4.52536	180.406	3.95e-41	4.28e-39
MAMLD1	-1.83734	4.27334	180.319	4.13e-41	4.43e-39
KRTAP1-5	1.40354	6.63698	179.001	8.01e-41	8.53e-39
OLFML2B	-2.21865	3.12244	178.813	8.8e-41	9.29e-39
COL6A3	-0.954265	11.7086	178.468	1.05e-40	1.1e-38
PLEKHG1	-2.24018	3.14492	178.113	1.25e-40	1.3e-38
PAPPA	1.27768	7.69457	177.781	1.48e-40	1.52e-38
BUB1B	-1.96352	4.40915	176.389	2.98e-40	3.05e-38
MAP1A	1.09842	7.96951	176.237	3.21e-40	3.26e-38
PCOLCE	-1.23542	8.35397	176.111	3.42e-40	3.45e-38
NEURL1B	-2.11493	2.89599	175.882	3.84e-40	3.84e-38
DIO2	1.17561	5.6984	175.01	5.96e-40	5.91e-38
ENPP2	-1.13009	7.67161	173.099	1.56e-39	1.53e-37
HSPB8	1.27743	4.74283	172.678	1.92e-39	1.88e-37
GTSE1	-1.79863	3.61219	168.773	1.37e-38	1.33e-36
PVR	1.08575	6.45605	167.546	2.54e-38	2.45e-36
CCNB1	-1.31316	5.67448	167.379	2.77e-38	2.64e-36
MFGE8	1.17474	9.37563	166.011	5.5e-38	5.22e-36
TROAP	-2.49985	2.94263	164.877	9.73e-38	9.17e-36
CCNA2	-1.60954	4.9333	164.374	1.25e-37	1.17e-35
LRRN3	1.86332	6.45318	164.337	1.28e-37	1.19e-35
FAM64A	-2.24464	2.90502	163.499	1.95e-37	1.8e-35
PPAP2B	-0.956215	6.23867	163.43	2.01e-37	1.84e-35
ADARB1	-1.14294	5.51181	162.888	2.65e-37	2.41e-35
CDCA3	-1.96657	3.12617	162.024	4.09e-37	3.69e-35
FAM65C	-1.34647	6.20348	161.451	5.45e-37	4.89e-35
DDAH1	1.00679	8.11175	160.88	7.27e-37	6.47e-35
GEM	-1.65434	3.85324	160.707	7.93e-37	7.01e-35
NEK2	-2.44743	3.3561	160.004	1.13e-36	9.92e-35
SCD5	0.990682	5.74535	159.86	1.21e-36	1.06e-34
SNCAIP	-1.64663	3.62166	158.044	3.03e-36	2.62e-34
C13orf15	-1.46162	4.77599	157.968	3.15e-36	2.71e-34
FHL1	0.903945	10.0767	157.788	3.44e-36	2.95e-34
TMEM119	-1.0358	7.15854	157.775	3.47e-36	2.95e-34
SPHKAP	-4.95553	1.33176	157.086	4.9e-36	4.14e-34
GJA5	2.86849	1.69051	156.459	6.72e-36	5.64e-34
HMMR	-1.94824	4.11406	156.379	6.99e-36	5.83e-34
INHBA	1.35865	5.2933	155.895	8.93e-36	7.4e-34
SERPINB7	1.34372	6.12266	155.828	9.23e-36	7.6e-34
FBXO5	-1.80965	3.92505	155.51	1.08e-35	8.86e-34
ARHGAP11A	-1.49137	5.40894	155.265	1.23e-35	9.97e-34
UHRF1	-1.37076	5.09289	154.966	1.42e-35	1.15e-33
DPYSL3	-0.818479	8.24346	154.824	1.53e-35	1.23e-33
EGR1	-1.7406	5.86978	154.614	1.7e-35	1.36e-33
GLS	1.13515	8.66951	152.09	6.05e-35	4.8e-33
EDNRA	-1.36013	4.66727	151.841	6.86e-35	5.41e-33
WISP1	-1.37864	4.13836	151.832	6.89e-35	5.41e-33
PDGFRL	-1.07275	5.20825	151.554	7.93e-35	6.18e-33
HIST1H2BK	1.13328	6.67692	150.5	1.35e-34	1.04e-32
NUF2	-2.4127	3.61236	150.202	1.57e-34	1.21e-32
COL11A1	1.27679	5.5903	149.445	2.29e-34	1.76e-32
CHI3L1	-0.959388	7.65411	149.327	2.43e-34	1.85e-32
MAD2L1	-1.50543	4.11011	149.018	2.84e-34	2.15e-32
ACTA2	0.798393	9.80334	148.627	3.46e-34	2.6e-32
STMN1	-1.073	7.37531	147.145	7.3e-34	5.46e-32
SKA3	-1.91387	3.25919	147.066	7.59e-34	5.65e-32
CRIM1	0.791279	9.27204	146.486	1.02e-33	7.52e-32
LOC100288637	-2.0192	2.72409	146.367	1.08e-33	7.94e-32
ARRDC4	1.09665	6.97332	146.357	1.08e-33	7.94e-32
UCHL1	0.798301	9.1432	146.281	1.13e-33	8.2e-32
CFB	-1.62046	3.70162	145.894	1.37e-33	9.91e-32
GM2A	1.59939	7.68	144.011	3.53e-33	2.54e-31
RACGAP1	-1.11655	5.39736	143.599	4.35e-33	3.11e-31
NOV	-1.01936	6.00261	143.002	5.87e-33	4.18e-31
TGFBI	-0.825611	9.4656	142.921	6.12e-33	4.33e-31
TSPAN13	1.34121	4.15685	142.334	8.22e-33	5.78e-31
MTUS1	-1.70252	2.85499	142.315	8.3e-33	5.78e-31
ANGPTL2	-0.961605	6.94414	142.314	8.3e-33	5.78e-31
COL3A1	-0.957931	11.369	142.289	8.41e-33	5.83e-31
SLC6A17	2.25154	2.1886	141.58	1.2e-32	8.28e-31
MMP1	-1.00459	9.92684	141.25	1.42e-32	9.73e-31
KIFC1	-2.20346	3.7127	140.894	1.7e-32	1.15e-30
RASGRF2	-1.06824	5.03415	140.889	1.7e-32	1.15e-30
MARCKSL1	-1.13199	5.4502	140.772	1.8e-32	1.22e-30
SORT1	0.938076	6.9254	140.389	2.19e-32	1.47e-30
NR4A3	-1.65006	3.6776	140.316	2.27e-32	1.52e-30
NCAPG2	-1.28879	4.91938	139.441	3.53e-32	2.34e-30
SRXN1	0.828276	6.26049	138.977	4.46e-32	2.95e-30
CMKLR1	-1.68386	3.45892	137.424	9.74e-32	6.41e-30
PTTG1	-1.31259	5.49553	136.906	1.26e-31	8.28e-30
PCDHGC3	-1.0267	5.93109	136.602	1.47e-31	9.6e-30
STRA6	-1.66785	4.67821	136.322	1.7e-31	1.1e-29
SLC9A7	1.42841	4.38827	136.182	1.82e-31	1.17e-29
HES1	-1.92288	2.84088	136.038	1.96e-31	1.26e-29
BTN3A1	-1.00816	5.17844	135.869	2.13e-31	1.36e-29
OXTR	0.965597	8.10353	135.482	2.59e-31	1.65e-29
SPP1	2.95016	0.857103	134.572	4.1e-31	2.59e-29
HSD11B1	-1.62743	3.71219	133.738	6.23e-31	3.92e-29
CRISPLD2	-1.43405	4.04715	133.546	6.87e-31	4.3e-29
MAP6	1.51035	3.73807	133.026	8.92e-31	5.56e-29
LAYN	0.865622	7.73306	132.372	1.24e-30	7.7e-29
CDC25B	-1.15612	6.72911	131.837	1.62e-30	1e-28
SLC35F5	0.884612	7.33611	131.545	1.88e-30	1.16e-28
CNN1	1.17542	6.92921	131.42	2e-30	1.23e-28
CALD1	0.936184	11.1812	131.015	2.46e-30	1.5e-28
FAM20A	-1.64646	5.45213	130.94	2.55e-30	1.55e-28
GGH	-1.35614	5.40206	130.483	3.21e-30	1.94e-28
KIF15	-1.93878	3.31388	130.153	3.79e-30	2.28e-28
DTL	-1.53231	3.66914	129.915	4.28e-30	2.56e-28
PTGES	-1.18375	5.07684	128.864	7.26e-30	4.32e-28
CLDN1	0.854715	7.23613	128.723	7.8e-30	4.62e-28
NDC80	-1.85409	4.05312	128.714	7.83e-30	4.62e-28
GABARAPL1	0.810285	7.43974	128.654	8.07e-30	4.74e-28
KIF18B	-2.50656	2.33481	128.529	8.6e-30	5.03e-28
COBLL1	1.13012	5.86116	127.515	1.43e-29	8.34e-28
SMC4	-1.27967	7.12694	127.451	1.48e-29	8.57e-28
SCARA3	-1.14631	6.74312	127.373	1.54e-29	8.88e-28
ATP2B4	0.877541	9.62317	127.321	1.58e-29	9.07e-28
PEA15	0.7377	9.42693	127.169	1.71e-29	9.76e-28
MAF	-2.41032	2.0289	127.12	1.75e-29	9.96e-28
ERAP1	-0.885004	7.07125	127.052	1.81e-29	1.03e-27
CDCA2	-1.77347	3.53967	126.691	2.17e-29	1.23e-27
NETO1	-1.55689	2.99199	126.252	2.71e-29	1.52e-27
NASP	-0.926454	5.98837	126.038	3.02e-29	1.69e-27
SLC1A1	1.125	4.72463	125.142	4.74e-29	2.64e-27
DAB2	0.90446	8.84689	125.08	4.89e-29	2.71e-27
TPM1	0.772702	10.1559	122.718	1.61e-28	8.88e-27
HNRNPD	-0.788735	7.39832	122.697	1.62e-28	8.94e-27
LRRC8C	-1.05027	4.86267	122.352	1.93e-28	1.06e-26
LGMN	0.815982	6.54947	122.25	2.04e-28	1.11e-26
KLF4	-1.32308	4.97588	121.981	2.33e-28	1.27e-26
CDKN2C	-2.10975	3.31963	121.618	2.8e-28	1.51e-26
NFIL3	-0.993849	5.7327	120.06	6.14e-28	3.31e-26
UNC5B	-1.03698	5.54469	120.005	6.31e-28	3.39e-26
DKK3	0.834839	10.3895	119.98	6.39e-28	3.41e-26
MFAP5	1.43346	5.23971	119.963	6.44e-28	3.43e-26
TACC3	-1.29415	4.58263	119.02	1.04e-27	5.5e-26
MYLIP	-1.38475	3.75067	118.706	1.21e-27	6.41e-26
ITGA8	-1.39033	4.30269	118.312	1.48e-27	7.79e-26
CTHRC1	-1.04058	6.76248	118.027	1.71e-27	8.96e-26
TCF7	-1.95775	2.21012	116.486	3.72e-27	1.94e-25
HJURP	-1.33117	4.24803	116.027	4.69e-27	2.44e-25
EFNB3	-2.01423	2.68207	115.926	4.93e-27	2.55e-25
H3F3B	-0.744799	7.74615	115.093	7.51e-27	3.87e-25
TNFRSF19	-0.795811	6.40893	115.052	7.67e-27	3.94e-25
CENPA	-2.58186	2.30299	113.747	1.48e-26	7.57e-25
GAS7	-1.0265	4.6824	113.677	1.53e-26	7.82e-25
PCDH18	-0.755068	7.91035	113.37	1.79e-26	9.09e-25
BDKRB2	-0.875489	7.95522	113.153	2e-26	1.01e-24
SOX11	-1.57039	3.26031	112.112	3.38e-26	1.7e-24
PRDX6	0.772557	9.6831	112.017	3.54e-26	1.78e-24
DCBLD2	0.838386	8.24757	111.514	4.57e-26	2.28e-24
MIR155HG	-3.06284	2.08791	111.05	5.77e-26	2.87e-24
ADH1B	-3.39672	3.18167	110.828	6.45e-26	3.2e-24
FAM83D	-1.49216	3.52373	110.464	7.75e-26	3.83e-24
C4orf49	0.897593	5.6508	109.98	9.9e-26	4.87e-24
PLCB4	1.3121	5.13875	109.782	1.09e-25	5.36e-24
GPNMB	-0.76917	8.18856	109.553	1.23e-25	6e-24
NIPA1	0.805037	6.12362	109.337	1.37e-25	6.66e-24
PDE4D	-1.2722	3.87125	109.25	1.43e-25	6.94e-24
TBC1D8	-1.16628	4.63417	108.685	1.9e-25	9.19e-24
IFITM1	-1.34844	6.74127	108.495	2.09e-25	1.01e-23
C6orf192	-1.14879	4.30745	108.466	2.12e-25	1.02e-23
PAPSS2	0.730726	8.32534	108.372	2.23e-25	1.06e-23
TNFAIP6	-1.56349	3.71148	108.137	2.51e-25	1.19e-23
KIF20B	-1.43939	4.7477	107.905	2.82e-25	1.34e-23
METTL7A	-1.77498	2.79924	107.471	3.51e-25	1.66e-23
PLEKHB2	0.686071	7.06167	107.232	3.96e-25	1.86e-23
OLFM2	-1.11851	5.25144	107.231	3.96e-25	1.86e-23
SVIL	0.73313	7.09527	107.21	4e-25	1.87e-23
KIF23	-1.18847	5.40737	106.726	5.11e-25	2.38e-23
MDFIC	-0.902716	6.80474	106.68	5.23e-25	2.43e-23
ATP6V0E1	0.69017	7.85433	106.487	5.77e-25	2.67e-23
TNFAIP3	-0.832998	6.17978	106.411	5.99e-25	2.76e-23
G0S2	-1.61333	3.73044	106.222	6.59e-25	3.03e-23
SH2B3	-0.761188	7.0332	105.744	8.39e-25	3.84e-23
CCDC81	1.80223	2.11402	105.526	9.37e-25	4.27e-23
TOX	-1.6468	3.39661	105.378	1.01e-24	4.59e-23
MOK	1.05912	4.74414	105.221	1.09e-24	4.95e-23
ANGPT1	0.825173	7.86879	104.927	1.27e-24	5.72e-23
GAS6	1.1568	9.55982	104.832	1.33e-24	5.98e-23
SLC6A15	-1.6334	3.22561	104.806	1.35e-24	6.04e-23
EZH2	-1.29349	3.97543	104.731	1.4e-24	6.25e-23
CASC5	-1.91571	3.75937	103.806	2.23e-24	9.94e-23
GPCPD1	-1.01635	5.26109	103.707	2.35e-24	1.04e-22
TAGLN	0.856121	9.92659	103.563	2.52e-24	1.12e-22
C1S	-0.702535	9.4929	103.279	2.91e-24	1.28e-22
FBLN7	-2.09929	1.8563	102.807	3.69e-24	1.62e-22
DACH1	-2.80421	1.34351	102.786	3.73e-24	1.64e-22
MCAM	0.835689	6.57904	102.38	4.58e-24	2e-22
ENDOD1	0.830706	6.30315	102.274	4.83e-24	2.1e-22
TNFRSF1B	-1.61371	2.71166	101.896	5.85e-24	2.54e-22
LTBP4	-1.54787	6.39115	101.639	6.66e-24	2.88e-22
APLP1	1.75193	3.46591	101.612	6.75e-24	2.91e-22
ELOVL2	-1.43065	4.06701	101.141	8.56e-24	3.68e-22
LBR	-0.947867	5.26847	101.06	8.92e-24	3.82e-22
CLPTM1L	0.765115	6.71729	100.947	9.45e-24	4.03e-22
HIST1H2BC	2.18708	1.64136	100.493	1.19e-23	5.05e-22
PDCD1LG2	0.822683	6.4207	100.46	1.21e-23	5.12e-22
SNCA	-1.73137	3.13018	100.411	1.24e-23	5.23e-22
MICA	0.850534	5.12061	100.394	1.25e-23	5.26e-22
ABAT	1.28626	3.40579	100.127	1.43e-23	6e-22
ZFP36L2	-0.695467	7.89582	99.8568	1.64e-23	6.85e-22
HIST1H2AC	1.13049	4.56205	99.7263	1.75e-23	7.3e-22
PLA2G4A	-1.27481	4.02115	99.7153	1.76e-23	7.31e-22
F2RL1	-0.980076	4.73369	99.2184	2.26e-23	9.37e-22
SPATA13	-0.827369	5.59321	99.0412	2.47e-23	1.02e-21
ERCC6L	-2.00451	2.30321	99.0216	2.5e-23	1.03e-21
USP1	-1.06451	5.40592	98.801	2.79e-23	1.15e-21
HTRA3	-1.7781	2.83601	98.3678	3.47e-23	1.42e-21
MELK	-1.25286	4.60263	98.0813	4.02e-23	1.64e-21
SIPA1L2	-0.90087	5.27352	98.0385	4.1e-23	1.67e-21
FAM82A2	0.880867	5.31206	98.0113	4.16e-23	1.69e-21
DCHS1	-1.24169	6.00228	97.9376	4.32e-23	1.75e-21
KLF9	-0.772208	5.9218	97.8735	4.46e-23	1.8e-21
FAM167A	-0.973235	4.86336	97.8366	4.54e-23	1.82e-21
BLM	-2.31883	2.09955	97.7128	4.84e-23	1.94e-21
CXCL2	-1.14143	4.19728	97.4178	5.61e-23	2.24e-21
KRT34	1.66907	3.47989	97.2723	6.04e-23	2.4e-21
UBA7	-1.24654	4.70224	97.0931	6.61e-23	2.62e-21
LMOD1	0.778146	7.42052	97.0418	6.79e-23	2.68e-21
TUBB2A	0.863425	5.5722	97.0396	6.8e-23	2.68e-21
PRSS23	0.688533	8.13728	96.8163	7.61e-23	2.99e-21
PRR16	-0.986418	4.74177	96.776	7.76e-23	3.04e-21
TMEM100	-1.78973	2.01191	96.7289	7.95e-23	3.11e-21
PTGS1	-0.770651	8.52864	95.9751	1.16e-22	4.53e-21
MN1	-1.44257	3.09208	95.6969	1.34e-22	5.2e-21
COL8A1	0.735292	8.05974	95.6889	1.34e-22	5.21e-21
P2RX7	-1.67584	3.05393	95.3217	1.62e-22	6.25e-21
PHLDA1	-0.768257	7.96585	95.079	1.83e-22	7.05e-21
RNF144A	-2.52984	1.93497	94.6341	2.29e-22	8.79e-21
RASL12	-2.52813	1.39469	94.279	2.74e-22	1.05e-20
NXPH3	1.66298	2.50718	94.2326	2.81e-22	1.07e-20
HPS5	0.79027	5.76058	94.0878	3.02e-22	1.15e-20
LRRC17	-1.02459	6.09222	93.939	3.25e-22	1.23e-20
CCNI	-0.772709	7.50133	93.8161	3.46e-22	1.31e-20
FST	-0.726839	6.24462	93.7574	3.57e-22	1.35e-20
CDKN3	-1.7824	3.4389	93.6042	3.85e-22	1.45e-20
EFHD1	1.98819	2.58366	93.3768	4.32e-22	1.62e-20
C13orf33	-1.29722	3.7201	93.2885	4.52e-22	1.69e-20
PDGFD	-1.05187	5.4375	93.1991	4.73e-22	1.76e-20
FOXF2	-1.02349	4.51308	93.1951	4.74e-22	1.76e-20
CCL7	-0.930259	5.38327	93.183	4.77e-22	1.77e-20
MXRA7	0.64555	8.39671	93.1003	4.97e-22	1.84e-20
HSPB7	1.27617	3.07396	92.4537	6.89e-22	2.54e-20
WDR76	-1.27802	3.60777	92.4205	7.01e-22	2.58e-20
CENPE	-1.31372	4.8114	92.2635	7.59e-22	2.78e-20
BLCAP	0.828346	6.37597	91.9362	8.95e-22	3.27e-20
RTN4	0.631368	10.4612	91.776	9.71e-22	3.54e-20
ADIPOR1	0.652744	6.72399	91.5502	1.09e-21	3.96e-20
PSMB9	-1.21924	3.87955	91.5011	1.12e-21	4.05e-20
AURKB	-1.76962	3.13803	91.4297	1.16e-21	4.18e-20
GREM2	-1.24531	4.30668	91.3248	1.22e-21	4.4e-20
CSF3	-1.89103	1.94076	91.2044	1.3e-21	4.66e-20
RAB3B	0.859592	7.57792	91.1945	1.3e-21	4.67e-20
SPC25	-1.76236	2.62278	90.7194	1.66e-21	5.92e-20
TOM1L2	0.973823	5.8932	90.5681	1.79e-21	6.38e-20
C4orf3	-1.13455	6.53236	89.9045	2.5e-21	8.89e-20
ATAD5	-1.99727	2.22972	89.8765	2.54e-21	9e-20
MLLT11	0.979463	6.14862	89.6626	2.82e-21	1e-19
HRH1	-0.972896	5.0016	89.4871	3.09e-21	1.09e-19
PTGS2	-0.806547	8.20537	89.352	3.3e-21	1.16e-19
FRY	0.832553	5.64599	89.2492	3.48e-21	1.22e-19
C7orf10	1.20086	4.12417	89.1756	3.61e-21	1.26e-19
TNFSF10	-2.25732	1.98073	89.0066	3.93e-21	1.37e-19
TCTA	0.937142	5.34616	88.7825	4.41e-21	1.53e-19
FSTL5	-2.75462	1.48546	88.4738	5.15e-21	1.79e-19
FAM108C1	-0.93649	4.93533	88.3421	5.51e-21	1.91e-19
RARRES2	-0.9219	6.40782	88.1659	6.02e-21	2.08e-19
SNED1	-1.35641	3.49133	87.8521	7.05e-21	2.43e-19
TUFT1	0.973976	4.67862	87.768	7.36e-21	2.53e-19
GADD45A	0.826533	6.12811	87.6202	7.93e-21	2.72e-19
NCAPD2	-0.776941	6.08366	87.5365	8.27e-21	2.83e-19
MYH11	2.07634	1.62523	87.4961	8.44e-21	2.88e-19
SMPDL3A	-0.931848	4.68994	87.4267	8.75e-21	2.97e-19
ROBO2	-1.01221	4.81596	87.1124	1.03e-20	3.48e-19
ZEB1	-0.77033	7.75909	86.8831	1.15e-20	3.9e-19
GLI3	-0.768665	5.72237	86.8633	1.16e-20	3.92e-19
LRIG3	-0.813545	5.26743	86.5823	1.34e-20	4.51e-19
ERCC6	0.847052	5.30621	86.3617	1.5e-20	5.03e-19
KALRN	0.867962	4.54297	85.7384	2.05e-20	6.88e-19
MSX2	-0.934108	4.92118	85.6433	2.16e-20	7.2e-19
NMNAT2	1.42921	2.58731	85.5374	2.27e-20	7.58e-19
RFX8	-1.82053	2.56722	85.4918	2.33e-20	7.73e-19
PRIM1	-1.54217	2.3783	85.4006	2.44e-20	8.08e-19
QPCTL	1.12898	3.68963	85.3756	2.47e-20	8.16e-19
LAMB1	-0.61692	9.64521	85.0102	2.97e-20	9.79e-19
TK1	-1.38924	4.49643	84.941	3.07e-20	1.01e-18
ESCO2	-1.75157	2.82344	84.7776	3.34e-20	1.1e-18
ASF1B	-1.4706	2.83395	84.7389	3.4e-20	1.11e-18
GPRC5A	1.1917	7.04374	84.5514	3.74e-20	1.22e-18
FMN1	1.0988	4.06	84.5267	3.79e-20	1.23e-18
PDE1C	0.819006	4.8171	84.1844	4.51e-20	1.46e-18
KIAA0101	-1.38451	4.4761	83.8043	5.46e-20	1.77e-18
EYA4	-0.998388	3.81438	83.7016	5.75e-20	1.86e-18
CAMK1G	-1.81343	1.77563	83.6051	6.04e-20	1.95e-18
NDFIP2	0.681825	6.66625	83.4161	6.65e-20	2.14e-18
RNASE4	-1.02341	4.78752	83.1514	7.6e-20	2.44e-18
CTSB	0.750556	11.869	82.9933	8.23e-20	2.64e-18
ALDH1B1	0.720315	5.99905	82.8081	9.04e-20	2.89e-18
CTDSP2	-0.672074	7.9467	82.5097	1.05e-19	3.35e-18
ALDH1A3	-0.934699	4.47502	82.4087	1.11e-19	3.52e-18
NRP1	-0.64675	8.07416	82.2589	1.19e-19	3.78e-18
FAM111B	-1.46159	3.274	81.8946	1.44e-19	4.54e-18
SLC43A3	-0.861981	4.8285	81.8745	1.45e-19	4.58e-18
RAD51AP1	-1.58869	3.05446	81.8432	1.47e-19	4.64e-18
RAD54L	-1.64403	2.37476	81.7081	1.58e-19	4.95e-18
LAMC2	0.95539	4.80429	81.6932	1.59e-19	4.98e-18
SERTAD4	-1.55789	3.27423	81.4502	1.8e-19	5.62e-18
FMNL2	-0.714888	6.2791	81.2329	2.01e-19	6.25e-18
GBP2	-0.777741	5.60358	81.058	2.19e-19	6.82e-18
MGST1	0.637963	8.27927	80.9378	2.33e-19	7.23e-18
CDON	-0.97998	3.9126	80.8927	2.38e-19	7.38e-18
DAG1	0.628196	7.49453	80.8601	2.42e-19	7.48e-18
IGFBP7	0.614357	9.30266	80.6123	2.75e-19	8.46e-18
ZFP36L1	-0.574353	8.69267	80.3712	3.1e-19	9.54e-18
CKS1B	-0.87179	4.58964	80.2246	3.34e-19	1.02e-17
NRAS	-0.834508	6.47714	79.9189	3.9e-19	1.19e-17
HSD17B6	1.0077	3.64264	79.8499	4.04e-19	1.23e-17
SIX1	-1.189	5.40915	79.7247	4.3e-19	1.31e-17
PPL	-1.90991	1.94777	79.4548	4.93e-19	1.5e-17
MYOCD	0.853519	6.09089	79.4024	5.07e-19	1.54e-17
DYNC1H1	0.798492	9.05062	79.1906	5.64e-19	1.71e-17
SLC2A1	0.814522	7.98072	79.1574	5.74e-19	1.73e-17
MYBL2	-1.45935	3.44238	79.1285	5.82e-19	1.75e-17
BRIP1	-1.08501	4.2458	79.1237	5.83e-19	1.75e-17
FUS	-0.60827	7.38992	78.8208	6.8e-19	2.04e-17
CDC25C	-2.12929	1.71513	78.435	8.27e-19	2.47e-17
C1RL	-0.791023	5.44012	78.3854	8.48e-19	2.53e-17
LOC100506394	0.86505	4.82413	78.2093	9.27e-19	2.76e-17
LXN	-0.946228	5.23167	78.1532	9.53e-19	2.83e-17
GK	-0.893798	4.30169	78.0656	9.97e-19	2.95e-17
GPR155	1.06525	4.02059	78.0457	1.01e-18	2.98e-17
MMP2	-0.650913	10.6718	77.9173	1.07e-18	3.17e-17
LOC730091	1.0543	3.59819	77.7472	1.17e-18	3.45e-17
PRELP	-0.800442	5.18558	77.6742	1.22e-18	3.57e-17
LOC646329	1.12741	4.72004	77.4378	1.37e-18	4.01e-17
FAT1	0.910648	9.35625	77.4146	1.39e-18	4.05e-17
SMURF2	0.662338	8.31962	77.3902	1.4e-18	4.09e-17
CCBE1	-0.815746	5.13338	77.3523	1.43e-18	4.16e-17
FAM111A	-0.760633	6.07113	77.044	1.67e-18	4.85e-17
HSPB6	0.958379	6.5151	77.0317	1.68e-18	4.87e-17
TMEM111	0.646325	6.0482	76.9924	1.72e-18	4.96e-17
MLF1IP	-1.44639	3.90928	76.8657	1.83e-18	5.28e-17
SERPINI1	1.8215	1.38784	76.699	1.99e-18	5.72e-17
KIF18A	-1.18377	3.89988	76.697	1.99e-18	5.72e-17
GBE1	0.604075	7.22516	76.6676	2.02e-18	5.8e-17
CXCL1	-0.577666	9.33496	76.4978	2.2e-18	6.3e-17
FANCD2	-1.32454	3.33962	76.4684	2.24e-18	6.38e-17
SH3PXD2B	-0.668321	6.19171	76.3324	2.4e-18	6.82e-17
MYO3B	-2.87354	0.595644	76.304	2.43e-18	6.91e-17
C15orf24	0.601777	6.88791	76.1475	2.63e-18	7.46e-17
TCF4	-0.743128	7.08962	75.9791	2.87e-18	8.11e-17
LMO7	0.624859	8.92022	75.8877	3e-18	8.47e-17
PTGDS	-2.01655	2.06265	75.8429	3.07e-18	8.65e-17
CNTRL	-1.06692	3.71745	75.7626	3.2e-18	8.99e-17
FRZB	-1.85469	1.61943	75.676	3.34e-18	9.37e-17
SBDSP1	0.834154	5.98974	75.6683	3.36e-18	9.39e-17
MAP3K5	-0.676826	5.97559	75.6452	3.4e-18	9.48e-17
RCC2	-0.636341	6.3224	75.5501	3.56e-18	9.92e-17
MTMR9LP	-1.21348	3.45359	75.522	3.61e-18	1e-16
HMGN2	-0.635967	7.62836	75.4508	3.75e-18	1.04e-16
SAMD12	1.0486	4.51554	75.2601	4.13e-18	1.14e-16
THBS2	-0.653779	8.82183	75.1412	4.38e-18	1.21e-16
STC1	-0.690497	7.69901	75.0464	4.6e-18	1.27e-16
NEFM	-1.33808	2.87774	74.9942	4.72e-18	1.3e-16
PEG10	-0.772467	5.158	74.9377	4.86e-18	1.33e-16
PCSK7	0.749469	6.13477	74.9048	4.94e-18	1.35e-16
MIS18BP1	-1.16873	4.82801	74.8736	5.02e-18	1.37e-16
GAB1	-0.899843	4.48632	74.8699	5.03e-18	1.37e-16
SLC1A3	-1.69642	2.15083	74.8556	5.06e-18	1.38e-16
TBX3	-0.576913	7.89265	74.8306	5.13e-18	1.39e-16
TEX2	0.619394	6.72086	74.7337	5.39e-18	1.46e-16
MCM6	-0.737466	5.53988	74.023	7.72e-18	2.09e-16
EPG5	0.728807	6.66782	73.9402	8.05e-18	2.17e-16
MCM10	-1.67396	2.74574	73.9342	8.08e-18	2.18e-16
ATAD2	-0.800749	5.37759	73.7913	8.68e-18	2.33e-16
KCNMB2	-2.25867	1.09389	73.6343	9.4e-18	2.52e-16
ESPL1	-1.51242	2.91706	73.5595	9.76e-18	2.61e-16
NRP2	-0.650043	6.56289	73.4266	1.04e-17	2.79e-16
DEK	-0.926701	7.46782	73.0686	1.25e-17	3.34e-16
CDKN1B	-0.773211	5.75857	72.8765	1.38e-17	3.67e-16
NAV3	0.886297	5.86553	72.8461	1.4e-17	3.72e-16
ATP6V1E1	0.690226	7.40126	72.6922	1.52e-17	4.02e-16
BMF	-1.87457	2.78776	72.4268	1.73e-17	4.59e-16
SLC39A14	-0.554999	8.2931	72.2513	1.89e-17	5e-16
NTN1	-1.72496	2.31231	72.1286	2.02e-17	5.31e-16
STX12	0.653727	7.29037	72.0061	2.15e-17	5.64e-16
FER1L6	-1.66981	1.93203	71.8571	2.31e-17	6.07e-16
EDNRB	-1.77683	1.56616	71.5358	2.72e-17	7.13e-16
WHSC1	-0.65948	6.5201	71.3115	3.05e-17	7.97e-16
C8orf4	0.643731	6.5944	71.0969	3.4e-17	8.87e-16
EDIL3	1.53924	2.1956	71.0499	3.48e-17	9.07e-16
TIA1	-0.663968	6.70976	70.9919	3.59e-17	9.32e-16
TOR1B	0.705175	5.62194	70.9083	3.74e-17	9.7e-16
H2AFJ	0.997113	5.51475	70.8126	3.93e-17	1.02e-15
C14orf132	-0.670312	6.21428	70.6269	4.32e-17	1.11e-15
EPS8	-0.69627	6.65342	70.5796	4.42e-17	1.14e-15
PIM1	-1.14031	4.38323	70.5139	4.57e-17	1.17e-15
KDELC2	-0.687189	6.82912	70.5123	4.57e-17	1.17e-15
LOX	0.660496	10.4511	70.479	4.65e-17	1.19e-15
SAA1	1.56052	2.03952	70.4543	4.71e-17	1.2e-15
C11orf82	-1.47964	2.56161	70.3662	4.93e-17	1.26e-15
RARRES1	-1.43834	3.16782	70.2866	5.13e-17	1.31e-15
IFI16	-0.881172	7.36913	70.1636	5.46e-17	1.39e-15
SAPCD2	-2.13466	2.02271	70.102	5.63e-17	1.43e-15
ADI1	0.604543	6.66661	70.0972	5.65e-17	1.43e-15
ATP6V0A1	0.685754	5.69649	69.9915	5.96e-17	1.51e-15
P4HA2	-0.625347	7.56415	69.9575	6.06e-17	1.53e-15
A2M	0.886479	5.06894	69.9339	6.13e-17	1.54e-15
IFI44L	-2.38295	3.91431	69.8549	6.38e-17	1.6e-15
ADD3	-0.653166	7.87516	69.8217	6.49e-17	1.63e-15
KNTC1	-0.832295	4.47464	69.801	6.56e-17	1.64e-15
FLNC	1.07391	8.0128	69.5882	7.31e-17	1.83e-15
FRMD6	0.613004	9.72368	69.2517	8.67e-17	2.16e-15
TRIP13	-1.16573	4.03907	69.1846	8.97e-17	2.23e-15
CLDN11	-0.615612	9.13769	69.16	9.08e-17	2.26e-15
PLK2	-0.641924	7.53348	69.0678	9.51e-17	2.36e-15
PCYOX1	0.690593	8.16081	69.0391	9.65e-17	2.39e-15
MEIS1	-0.687107	5.99065	68.8662	1.05e-16	2.6e-15
EXO1	-1.61899	2.82672	68.7816	1.1e-16	2.71e-15
SLC7A2	-1.03327	5.27988	68.7452	1.12e-16	2.76e-15
LOC100507421	1.86668	2.30036	68.6647	1.17e-16	2.87e-15
SECTM1	-1.31094	4.73706	68.6514	1.18e-16	2.88e-15
BCL2L2	0.594505	6.65291	68.6058	1.2e-16	2.94e-15
IFI44	-1.41633	4.79442	68.5779	1.22e-16	2.98e-15
TP53INP2	0.720598	5.99972	68.4095	1.33e-16	3.24e-15
MYOZ2	2.09626	1.38422	68.3281	1.38e-16	3.37e-15
MET	0.682378	6.76381	68.3105	1.4e-16	3.39e-15
PLEKHA4	-1.39287	3.69699	68.2336	1.45e-16	3.52e-15
RAB38	-1.06621	3.33318	68.221	1.46e-16	3.54e-15
ADAMTS2	-0.701938	6.22001	68.1665	1.5e-16	3.63e-15
SSRP1	-0.681531	6.51621	68.1018	1.55e-16	3.74e-15
SRSF2	-0.60047	7.10621	68.0299	1.61e-16	3.88e-15
COL15A1	-2.16405	2.31988	67.9237	1.7e-16	4.08e-15
ATG4A	0.804017	4.30487	67.9021	1.72e-16	4.12e-15
TUBA4A	1.01487	3.97528	67.7732	1.83e-16	4.39e-15
FAIM2	-1.51193	2.12598	67.767	1.84e-16	4.4e-15
PEBP1	0.585301	7.45933	67.7435	1.86e-16	4.44e-15
SMAD1	-0.752766	4.97549	67.7216	1.88e-16	4.48e-15
HNRNPF	-0.56719	7.28297	67.7195	1.88e-16	4.48e-15
APOL6	-0.817001	5.31079	67.663	1.94e-16	4.6e-15
CDCA5	-1.22705	3.54132	67.6181	1.98e-16	4.7e-15
MAP1B	0.735962	8.40332	67.4336	2.18e-16	5.15e-15
PLCL2	-0.982888	3.70746	67.3316	2.29e-16	5.41e-15
TCF19	-1.03708	3.77826	67.3137	2.32e-16	5.45e-15
FANCI	-0.868834	4.7814	67.0937	2.59e-16	6.09e-15
RNF175	-1.42342	2.75571	67.0731	2.62e-16	6.14e-15
LCP1	0.684174	6.06992	67.0504	2.65e-16	6.2e-15
ACOT7	0.965525	5.02668	66.9554	2.78e-16	6.49e-15
SLCO2B1	1.88095	1.33477	66.8202	2.97e-16	6.94e-15
TGFB2	0.97829	5.36808	66.6845	3.19e-16	7.42e-15
FGF2	0.721436	8.4624	66.5387	3.43e-16	7.98e-15
KLHL21	0.951951	5.38148	66.4028	3.68e-16	8.53e-15
KCNN2	0.904277	3.81222	65.953	4.62e-16	1.07e-14
MRAS	0.664492	6.15708	65.9073	4.73e-16	1.09e-14
RALGPS2	-0.667	6.67089	65.8566	4.85e-16	1.12e-14
VEGFA	-0.583913	6.67832	65.7932	5.01e-16	1.15e-14
SLC39A8	-0.733419	5.83927	65.745	5.13e-16	1.18e-14
HNRNPH1	-0.576983	8.04428	65.7125	5.22e-16	1.2e-14
GUSB	-0.760664	4.99929	65.6601	5.36e-16	1.23e-14
RGNEF	0.776848	5.14342	65.5085	5.79e-16	1.32e-14
ZNF367	-1.25144	2.83098	65.4228	6.04e-16	1.38e-14
S100A10	-0.688899	7.59863	65.4043	6.1e-16	1.39e-14
IL1RN	-1.61713	2.25	65.3007	6.43e-16	1.46e-14
ZNF622	0.747804	5.01915	65.2667	6.54e-16	1.49e-14
KCNC4	1.199	2.97806	65.0979	7.13e-16	1.62e-14
TGIF1	-0.701379	5.67702	64.7985	8.3e-16	1.88e-14
CLSPN	-1.15789	3.60094	64.743	8.53e-16	1.93e-14
LINC00152	0.736448	4.68427	64.7156	8.65e-16	1.95e-14
CEP152	-1.03134	3.32182	64.6653	8.88e-16	2e-14
SLC9A9	-1.15662	2.68375	64.6368	9.01e-16	2.03e-14
SELPLG	1.20855	2.70346	64.5283	9.52e-16	2.14e-14
ETS1	-0.580727	6.94541	64.5254	9.53e-16	2.14e-14
KREMEN1	-0.958597	4.20766	64.4544	9.88e-16	2.21e-14
BPGM	0.759215	5.40248	64.4304	1e-15	2.23e-14
HIST1H2BD	0.953951	4.13009	64.405	1.01e-15	2.26e-14
TNFRSF10C	1.02638	3.3387	64.3636	1.03e-15	2.3e-14
RSU1	0.529275	7.51887	64.353	1.04e-15	2.31e-14
GINS2	-1.31856	2.47895	64.3312	1.05e-15	2.33e-14
SEMA4D	-1.442	2.70687	64.295	1.07e-15	2.37e-14
RPL22L1	-1.03588	6.35675	64.2302	1.11e-15	2.45e-14
GFM2	0.637416	6.16024	64.0209	1.23e-15	2.72e-14
PERP	0.67781	8.62584	63.8414	1.35e-15	2.97e-14
PRRX1	-0.627383	8.1328	63.8214	1.36e-15	3e-14
MAP3K8	-1.16029	2.83811	63.7769	1.39e-15	3.06e-14
SH3RF2	1.12669	3.58668	63.7594	1.41e-15	3.08e-14
VCAN	-0.985786	5.546	63.4249	1.67e-15	3.65e-14
TCF12	-0.701458	7.33008	63.2319	1.84e-15	4.02e-14
CKS2	-0.898244	5.15964	63.2235	1.85e-15	4.03e-14
PSIP1	-0.823111	6.31157	63.0666	2e-15	4.35e-14
CASP7	-0.72606	5.2256	63.0653	2e-15	4.35e-14
BCAP31	0.730792	7.3115	63.0479	2.02e-15	4.38e-14
SERPINB9	-0.860488	4.13691	62.9951	2.07e-15	4.49e-14
REEP2	1.05556	4.73344	62.9612	2.11e-15	4.56e-14
MTSS1	-1.56909	2.18698	62.8025	2.29e-15	4.94e-14
SKA1	-1.36996	2.75085	62.7029	2.4e-15	5.19e-14
LOC100129034	-0.624642	6.17611	62.6609	2.46e-15	5.29e-14
PIP4K2C	0.704187	5.34765	62.5086	2.65e-15	5.7e-14
STIM1	0.732515	5.65717	62.3448	2.88e-15	6.19e-14
TACSTD2	0.903969	3.94067	62.2699	2.99e-15	6.42e-14
MEX3B	-1.20506	3.0949	62.2667	3e-15	6.42e-14
LRP8	0.903782	3.87585	62.2629	3.01e-15	6.42e-14
PRDX1	0.533561	8.90274	62.1666	3.16e-15	6.73e-14
HNRNPA1	-0.623383	6.57077	62.1514	3.18e-15	6.77e-14
RCAN2	-0.906611	5.03378	62.0223	3.4e-15	7.22e-14
FOXQ1	-1.4949	2.06486	61.95	3.52e-15	7.48e-14
NR4A2	-1.45615	3.21558	61.9446	3.53e-15	7.48e-14
TMEM158	-0.621792	6.42275	61.8312	3.74e-15	7.92e-14
ZNF22	-0.923404	4.92118	61.675	4.05e-15	8.56e-14
HSD17B11	-0.792829	5.06131	61.5878	4.23e-15	8.93e-14
TENC1	-0.870415	5.82308	61.5631	4.29e-15	9.03e-14
WDR62	-1.59993	2.33628	61.5447	4.33e-15	9.1e-14
TMEM66	0.55731	8.08379	61.5137	4.4e-15	9.23e-14
MMP11	-1.25872	3.45331	61.4016	4.65e-15	9.75e-14
LOC401093	0.85985	4.29405	61.2635	4.99e-15	1.04e-13
MT1E	-0.91182	6.49621	61.2384	5.06e-15	1.06e-13
WARS	-0.538075	7.75027	61.2117	5.13e-15	1.07e-13
HEG1	0.591729	8.07851	61.1237	5.36e-15	1.11e-13
PSG1	1.82349	1.33664	61.1228	5.36e-15	1.11e-13
GRIA1	-1.54864	2.06873	60.9992	5.71e-15	1.18e-13
MCM7	-0.771552	5.67007	60.9316	5.91e-15	1.22e-13
DNAJC22	-2.67702	0.757767	60.8933	6.03e-15	1.25e-13
HHEX	-0.800281	4.86279	60.8881	6.04e-15	1.25e-13
ANP32A	-0.662811	5.92118	60.8834	6.06e-15	1.25e-13
PGBD3	1.01089	3.66678	60.821	6.25e-15	1.29e-13
HEATR5A	0.620864	6.62004	60.7695	6.42e-15	1.32e-13
ATP6V1A	0.561387	6.6047	60.6094	6.96e-15	1.43e-13
FGL2	-2.97479	-0.103847	60.6068	6.97e-15	1.43e-13
ITGA4	-0.622542	6.87068	60.5924	7.02e-15	1.44e-13
IGFBP5	-0.552842	11.636	60.5595	7.14e-15	1.46e-13
PRICKLE1	0.720562	4.65557	60.502	7.35e-15	1.5e-13
IFITM2	-0.743979	7.03706	60.4329	7.61e-15	1.55e-13
LIMCH1	0.592519	6.32038	60.2527	8.34e-15	1.7e-13
LPHN2	-0.786336	4.76145	60.2248	8.46e-15	1.72e-13
TMEM178	0.912455	3.31795	60.2016	8.56e-15	1.74e-13
EMP2	-0.657496	5.58555	60.1316	8.87e-15	1.8e-13
LAMA1	-0.837353	4.41383	60.1125	8.96e-15	1.81e-13
KLF3	-0.705286	5.91896	60.0135	9.42e-15	1.9e-13
DEPDC1B	-2.12265	1.91079	59.9614	9.67e-15	1.95e-13
SQSTM1	0.631279	9.17016	59.9385	9.79e-15	1.97e-13
DDIT4	-0.762994	5.14832	59.924	9.86e-15	1.98e-13
SPSB1	-0.820952	4.60552	59.9135	9.91e-15	1.99e-13
CAP2	0.678844	6.36698	59.7758	1.06e-14	2.13e-13
CD109	-0.628629	8.31361	59.6797	1.12e-14	2.23e-13
CCDC109B	-1.06111	3.20689	59.659	1.13e-14	2.25e-13
C12orf5	0.647013	6.12508	59.4843	1.23e-14	2.46e-13
DDA1	0.794892	5.56658	59.4595	1.25e-14	2.48e-13
SERINC1	0.570437	9.27684	59.4275	1.27e-14	2.52e-13
HERC4	0.595993	8.28256	59.3941	1.29e-14	2.56e-13
KLC1	0.541305	7.31108	59.3702	1.31e-14	2.59e-13
RNF41	0.548064	6.43295	59.3577	1.31e-14	2.6e-13
SH2D5	1.16775	2.95271	59.2747	1.37e-14	2.71e-13
ROR2	-1.33459	3.06313	59.2715	1.37e-14	2.71e-13
GPR124	-0.658891	8.05685	59.2226	1.41e-14	2.77e-13
MARCKS	-0.603657	8.76261	59.1961	1.43e-14	2.81e-13
C21orf91	-0.809294	5.18378	59.112	1.49e-14	2.92e-13
ARHGAP28	-0.803871	5.21891	59.0693	1.52e-14	2.98e-13
KATNAL1	0.668529	6.21544	59.0118	1.57e-14	3.07e-13
ANXA2	0.491506	10.4716	58.9669	1.6e-14	3.13e-13
AMPD3	0.540255	6.65045	58.9525	1.62e-14	3.15e-13
ANP32B	-0.684141	6.81203	58.8585	1.69e-14	3.3e-13
EHF	1.18355	3.91747	58.8438	1.71e-14	3.32e-13
PRKAR2B	-0.816008	5.12211	58.818	1.73e-14	3.36e-13
ZWINT	-1.06972	4.12304	58.7921	1.75e-14	3.4e-13
HNRPDL	-0.592461	7.88983	58.7755	1.77e-14	3.42e-13
AAK1	0.613133	6.32394	58.7656	1.78e-14	3.44e-13
CCND3	0.850432	5.53087	58.7405	1.8e-14	3.47e-13
PREPL	0.610383	6.97101	58.6261	1.91e-14	3.68e-13
FBLN2	-0.786638	7.59133	58.5888	1.94e-14	3.74e-13
MYL9	0.609626	9.7414	58.5529	1.98e-14	3.81e-13
PLEKHO1	-0.743194	5.18382	58.3968	2.14e-14	4.11e-13
EVL	-0.770434	4.62941	58.3065	2.24e-14	4.3e-13
CKAP2	-0.804678	5.71615	58.2276	2.33e-14	4.47e-13
SOCS3	-1.01632	4.35224	58.158	2.42e-14	4.62e-13
KIAA0319L	0.597058	6.4502	58.0818	2.51e-14	4.8e-13
NFKBIA	-0.539193	6.48841	58.0804	2.52e-14	4.8e-13
EML1	-0.562742	6.22704	57.9534	2.68e-14	5.11e-13
HAGH	1.02055	4.07121	57.888	2.77e-14	5.27e-13
GLUL	-0.523159	7.21234	57.8818	2.78e-14	5.28e-13
LIFR	-0.770051	5.42616	57.5275	3.33e-14	6.32e-13
FBL	-0.66878	5.92044	57.5055	3.37e-14	6.38e-13
ZFHX2	1.24435	2.70362	57.4905	3.4e-14	6.42e-13
GATA6	-1.22382	2.78505	57.3775	3.6e-14	6.79e-13
EMILIN2	-0.901789	4.2336	57.3124	3.72e-14	7e-13
AMOTL2	0.607781	7.32047	56.9772	4.41e-14	8.29e-13
SGOL2	-1.15781	4.49915	56.9765	4.41e-14	8.29e-13
HDAC9	0.846481	4.23567	56.8845	4.62e-14	8.67e-13
SPON2	-1.13791	3.40627	56.875	4.64e-14	8.7e-13
NR1H3	-1.01618	3.62443	56.8285	4.76e-14	8.9e-13
KIAA1524	-1.2664	4.33812	56.7864	4.86e-14	9.07e-13
PRR11	-0.68847	5.44237	56.6939	5.09e-14	9.5e-13
AEBP1	-0.794259	8.13676	56.5603	5.45e-14	1.02e-12
ATP6V1D	0.566254	6.62549	56.5513	5.48e-14	1.02e-12
2006-09-01	-0.649404	5.44721	56.4727	5.7e-14	1.06e-12
BAALC	-1.18244	3.12113	56.4183	5.86e-14	1.09e-12
ARHGAP26	-1.12259	3.01009	56.4099	5.88e-14	1.09e-12
SLC20A2	0.561234	6.60348	56.3898	5.94e-14	1.1e-12
HIST1H4H	1.9449	1.08931	56.3872	5.95e-14	1.1e-12
LOC645638	0.817006	5.4783	56.3574	6.04e-14	1.11e-12
SLC25A4	0.843951	3.9931	56.2384	6.42e-14	1.18e-12
DNMT1	-0.602185	6.25178	56.2344	6.43e-14	1.18e-12
CMTM3	-0.64707	5.33903	56.2077	6.52e-14	1.2e-12
AUTS2	-1.50092	2.02306	55.828	7.91e-14	1.45e-12
ALDH5A1	1.19459	2.14306	55.8172	7.95e-14	1.46e-12
NEIL3	-1.76572	2.12904	55.7055	8.42e-14	1.54e-12
SENP1	-0.732976	4.67122	55.6538	8.64e-14	1.58e-12
OAS3	-1.40453	5.69819	55.6433	8.69e-14	1.58e-12
ATP6V1F	0.595051	6.01487	55.6199	8.79e-14	1.6e-12
MMD	-0.739535	5.13252	55.541	9.15e-14	1.66e-12
MYO10	-0.526591	7.20586	55.4756	9.46e-14	1.72e-12
GPRC5B	-1.00639	3.80876	55.3728	9.97e-14	1.81e-12
GLT8D2	-0.650075	6.47765	55.3065	1.03e-13	1.87e-12
TFPI2	-0.880105	5.77507	55.1869	1.1e-13	1.98e-12
ATP6V1H	0.584376	5.80373	55.1817	1.1e-13	1.98e-12
C15orf42	-1.3475	2.42703	55.1194	1.13e-13	2.05e-12
RFTN2	-1.75948	2.01014	55.069	1.16e-13	2.1e-12
TFAP2C	-0.730328	4.49024	55.0513	1.17e-13	2.11e-12
FAM20C	-0.858685	6.337	55.0488	1.18e-13	2.11e-12
PXK	-0.684727	5.42068	55.0201	1.19e-13	2.14e-12
PAG1	-0.701044	4.59379	54.946	1.24e-13	2.22e-12
E2F7	-1.11155	3.48455	54.9389	1.24e-13	2.22e-12
DUSP5	0.769387	5.45666	54.8694	1.29e-13	2.3e-12
COL4A6	-1.29171	2.65823	54.8514	1.3e-13	2.32e-12
PCBD1	0.750028	5.36266	54.7961	1.34e-13	2.38e-12
NAV2	-0.725628	5.06074	54.7643	1.36e-13	2.42e-12
PTGFRN	-0.502856	6.89147	54.7516	1.37e-13	2.43e-12
RAD23B	0.552416	8.62772	54.7299	1.38e-13	2.45e-12
SULF1	0.612876	9.76649	54.6131	1.47e-13	2.6e-12
P2RX5	2.73676	0.374468	54.5032	1.55e-13	2.75e-12
PLD1	-0.675691	5.40287	54.4939	1.56e-13	2.76e-12
CENPI	-1.09031	2.74287	54.3832	1.65e-13	2.91e-12
DDX26B	-0.877087	3.90998	54.3492	1.68e-13	2.96e-12
CHN1	-0.757918	5.47634	54.2238	1.79e-13	3.15e-12
B3GNT5	-1.11938	4.22647	54.1811	1.83e-13	3.21e-12
POC1B	0.711413	4.87042	54.0917	1.91e-13	3.36e-12
RGS17	-1.21989	2.49916	54.0809	1.92e-13	3.37e-12
SAMD4A	0.515432	7.34904	54.0051	2e-13	3.5e-12
C9orf5	0.544529	6.76226	53.9241	2.08e-13	3.64e-12
CLCA2	1.43057	3.53369	53.8677	2.14e-13	3.74e-12
MDM4	-0.829088	4.3479	53.8221	2.19e-13	3.83e-12
STXBP1	0.610835	5.78158	53.7053	2.33e-13	4.06e-12
PI4K2A	0.602299	5.80596	53.6257	2.43e-13	4.22e-12
KPNA2	-0.502765	7.19052	53.5386	2.54e-13	4.4e-12
MTHFD1L	-0.561562	6.60976	53.4568	2.64e-13	4.58e-12
PHF14	-0.823683	4.73275	53.4226	2.69e-13	4.66e-12
SPRY1	-1.30104	2.94376	53.4041	2.72e-13	4.7e-12
CDC6	-0.960266	3.86922	53.3343	2.81e-13	4.86e-12
BLMH	-0.782101	4.97936	53.3096	2.85e-13	4.92e-12
C1orf198	0.57353	7.74308	53.302	2.86e-13	4.93e-12
NDRG1	-0.636459	6.34297	53.2668	2.91e-13	5.01e-12
CDC42EP4	-0.689587	5.68157	53.1534	3.08e-13	5.3e-12
TPD52L1	1.32583	2.58756	53.0373	3.27e-13	5.61e-12
LOC730755	1.3548	3.63381	53.0353	3.28e-13	5.61e-12
COL5A1	-0.563714	9.91205	52.9588	3.41e-13	5.83e-12
PSRC1	-1.00921	3.46285	52.9433	3.43e-13	5.87e-12
KRT7	1.39174	2.71767	52.8587	3.58e-13	6.12e-12
ECM1	-0.655172	7.32108	52.848	3.6e-13	6.14e-12
KIF1C	0.695162	7.92643	52.8199	3.66e-13	6.22e-12
ADAMTS12	0.582631	6.49568	52.7326	3.82e-13	6.5e-12
PTRF	0.542243	9.90359	52.1941	5.03e-13	8.54e-12
MYBPH	-2.40069	0.642224	52.1123	5.24e-13	8.89e-12
ODC1	0.544546	6.51255	51.9513	5.69e-13	9.64e-12
HNRNPA3	-0.507082	8.20305	51.877	5.91e-13	1e-11
ACSS1	-1.18804	3.52845	51.8651	5.94e-13	1e-11
WDR41	0.556164	6.67835	51.8472	6e-13	1.01e-11
NQO1	0.496992	8.28896	51.8115	6.11e-13	1.03e-11
DNM1	-0.829048	5.17883	51.7996	6.15e-13	1.03e-11
MFSD1	0.574142	6.97639	51.7728	6.23e-13	1.05e-11
SIX4	-0.836098	5.22181	51.7498	6.3e-13	1.06e-11
FUCA1	0.629913	5.45108	51.6723	6.56e-13	1.1e-11
SMCHD1	-0.625825	6.60335	51.5767	6.89e-13	1.15e-11
ZNF395	-0.657814	5.24096	51.5106	7.12e-13	1.19e-11
H1F0	-0.497599	7.42143	51.5101	7.12e-13	1.19e-11
NGRN	0.493931	6.81073	51.4596	7.31e-13	1.22e-11
ORC6	-1.02693	3.22563	51.3649	7.67e-13	1.28e-11
HOTAIR	0.593156	5.58737	51.2959	7.94e-13	1.32e-11
PKMYT1	-1.69601	1.84218	51.2371	8.19e-13	1.36e-11
CCNE2	-1.20442	3.10703	51.1686	8.48e-13	1.41e-11
F3	0.540497	7.99088	50.988	9.29e-13	1.54e-11
TMEM159	0.588676	5.60584	50.9861	9.3e-13	1.54e-11
GCNT4	1.20062	3.24298	50.9544	9.45e-13	1.56e-11
TMSB15A	-2.25264	0.833265	50.9503	9.47e-13	1.56e-11
ENPEP	-2.18992	1.15882	50.9051	9.69e-13	1.6e-11
GIMAP2	-1.76554	1.38101	50.8949	9.74e-13	1.61e-11
FKBP7	-0.761245	5.90881	50.8666	9.89e-13	1.63e-11
SGOL1	-2.19787	2.14981	50.8312	1.01e-12	1.65e-11
CDK18	1.16182	2.96176	50.8181	1.01e-12	1.66e-11
TRIB1	-0.724838	4.40464	50.8013	1.02e-12	1.67e-11
PPME1	0.543917	6.15228	50.7569	1.05e-12	1.71e-11
VWA5A	-1.47347	2.81744	50.6011	1.13e-12	1.85e-11
RGMB	0.472064	8.4245	50.5674	1.15e-12	1.88e-11
ARL6IP1	-0.613005	6.92007	50.5264	1.18e-12	1.92e-11
C9orf25	0.692825	5.01634	50.4484	1.22e-12	1.99e-11
ELL2	0.582483	8.21619	50.3161	1.31e-12	2.13e-11
GDF11	0.690547	5.05806	50.2999	1.32e-12	2.14e-11
CDK17	-0.644465	6.31114	50.2866	1.33e-12	2.16e-11
LOC400550	-0.568985	6.24213	50.1211	1.45e-12	2.34e-11
FSTL3	0.805586	4.95234	50.0667	1.49e-12	2.41e-11
USP28	-0.647653	5.44976	50.0552	1.49e-12	2.42e-11
TCTN3	0.514762	6.35496	50.0149	1.53e-12	2.46e-11
BAG3	0.521762	6.25994	49.9853	1.55e-12	2.5e-11
UFD1L	0.521901	6.01756	49.9272	1.6e-12	2.57e-11
PLOD2	0.596924	8.79555	49.8122	1.69e-12	2.72e-11
ORMDL2	0.708418	4.28485	49.7771	1.72e-12	2.77e-11
ZFP106	0.599506	7.01692	49.7427	1.75e-12	2.81e-11
RBM24	0.775581	4.26478	49.7392	1.76e-12	2.81e-11
SP3	-0.597248	6.85328	49.6664	1.82e-12	2.92e-11
CD83	-1.14002	2.66753	49.6643	1.82e-12	2.92e-11
FUT8	-0.575286	6.31212	49.6078	1.88e-12	3e-11
WLS	-0.476352	7.07576	49.4003	2.09e-12	3.33e-11
TCEAL4	0.544455	7.10528	49.3707	2.12e-12	3.38e-11
TPRG1L	0.560512	6.08338	49.2893	2.21e-12	3.51e-11
SEPHS1	-0.584058	5.42331	49.2868	2.21e-12	3.51e-11
HMGB1	-0.598403	8.42723	49.2561	2.25e-12	3.57e-11
SEPW1	0.753953	5.6688	49.1885	2.33e-12	3.69e-11
SIRPA	0.547693	6.87784	49.0455	2.5e-12	3.96e-11
AVEN	0.627377	4.9501	48.9758	2.59e-12	4.1e-11
TINAGL1	0.973574	4.6577	48.9052	2.69e-12	4.24e-11
C16orf5	1.05201	4.22028	48.8773	2.72e-12	4.3e-11
FTL	0.557783	11.0899	48.8465	2.77e-12	4.36e-11
NEAT1	0.443252	10.0839	48.8204	2.81e-12	4.41e-11
MACF1	0.651945	8.07097	48.8123	2.82e-12	4.43e-11
STOML1	1.00933	3.07258	48.7528	2.9e-12	4.56e-11
RFC3	-1.11098	3.45956	48.7081	2.97e-12	4.66e-11
MCM2	-0.937848	4.01981	48.7013	2.98e-12	4.67e-11
HAS3	1.35939	1.90057	48.5823	3.17e-12	4.95e-11
CCDC136	0.781806	3.72761	48.581	3.17e-12	4.95e-11
IL24	-1.87025	0.71972	48.4955	3.31e-12	5.17e-11
APOL3	-1.15903	2.2263	48.4935	3.31e-12	5.17e-11
PLSCR1	-1.02095	5.26079	48.4809	3.34e-12	5.19e-11
ADCY6	0.634446	6.7602	48.4214	3.44e-12	5.35e-11
NEDD4L	0.554275	6.6878	48.3704	3.53e-12	5.48e-11
DST	0.733909	8.67081	48.3693	3.53e-12	5.48e-11
SSR2	-0.512023	7.63567	48.3362	3.59e-12	5.56e-11
BRCA1	-0.761884	3.90481	48.3129	3.63e-12	5.62e-11
TRA2B	-0.533186	6.80395	48.2602	3.73e-12	5.77e-11
DGKA	0.502424	6.37016	48.2546	3.74e-12	5.78e-11
SOD1	0.505334	7.20877	48.2113	3.83e-12	5.9e-11
PCYT1A	0.559606	5.5205	48.1444	3.96e-12	6.1e-11
KLF13	-0.596355	5.59988	48.0285	4.2e-12	6.46e-11
TMEM26	-1.8538	2.24857	47.9478	4.38e-12	6.73e-11
C12orf69	2.93402	0.114606	47.9213	4.44e-12	6.81e-11
PAPLN	-0.940209	3.50372	47.8898	4.51e-12	6.91e-11
C16orf53	-0.695548	4.58299	47.843	4.62e-12	7.07e-11
IQGAP2	-2.38658	0.656907	47.8378	4.63e-12	7.08e-11
NRM	-0.932105	3.57622	47.822	4.67e-12	7.13e-11
HDGF	-0.443019	8.19604	47.7221	4.91e-12	7.49e-11
XRCC2	-1.47494	1.55877	47.626	5.16e-12	7.85e-11
SAMHD1	-0.709237	5.78916	47.626	5.16e-12	7.85e-11
COX14	0.636005	4.64041	47.6066	5.21e-12	7.92e-11
TMTC4	-0.83087	3.7194	47.5664	5.32e-12	8.08e-11
PSG9	1.52835	1.09914	47.5492	5.36e-12	8.14e-11
HNMT	-0.77585	4.56992	47.5442	5.38e-12	8.15e-11
POLD3	-0.798515	4.19106	47.4925	5.52e-12	8.36e-11
MBTD1	-0.692487	4.60594	47.4893	5.53e-12	8.36e-11
L1CAM	0.84132	8.36793	47.4543	5.63e-12	8.5e-11
ANXA1	0.523982	9.58742	47.368	5.88e-12	8.88e-11
OAS1	-1.73328	3.97505	47.2932	6.11e-12	9.21e-11
KIAA1549	0.641278	5.00411	47.251	6.25e-12	9.4e-11
ATP6AP1	0.648963	7.04152	47.2044	6.4e-12	9.61e-11
MCM3	-0.646076	5.34237	47.1872	6.45e-12	9.69e-11
ANP32E	-0.666371	6.08709	47.1402	6.61e-12	9.91e-11
PPIB	-0.456606	7.40285	47.1152	6.69e-12	1e-10
TIMP3	0.478876	11.3145	47.0447	6.94e-12	1.04e-10
ZNF300	-0.856248	3.95953	47.0316	6.99e-12	1.04e-10
TFPI	-0.632217	6.98649	46.9713	7.2e-12	1.08e-10
BHLHE41	1.08981	2.87858	46.85	7.66e-12	1.14e-10
B2M	-0.517991	11.4611	46.8363	7.72e-12	1.15e-10
SSBP2	-0.607179	5.25969	46.7036	8.26e-12	1.23e-10
GPD2	-0.540952	5.84673	46.6866	8.33e-12	1.24e-10
GMNN	-0.963596	4.02634	46.6346	8.55e-12	1.27e-10
LIPG	1.58916	1.22771	46.6324	8.56e-12	1.27e-10
NF2	0.602218	5.5158	46.5496	8.93e-12	1.32e-10
AGPAT4	-0.799264	3.39494	46.5189	9.07e-12	1.34e-10
NHS	-0.923995	3.36191	46.4992	9.17e-12	1.35e-10
PRRT2	-0.871796	4.07984	46.4819	9.25e-12	1.37e-10
SALL1	-0.608329	5.53475	46.454	9.38e-12	1.38e-10
MAMDC2	0.645592	5.19619	46.3677	9.8e-12	1.44e-10
DHCR7	0.686903	5.47189	46.3422	9.93e-12	1.46e-10
STC2	0.491217	9.28672	46.294	1.02e-11	1.49e-10
PFN2	0.499338	8.61796	46.2938	1.02e-11	1.49e-10
TM7SF3	0.504793	6.81801	46.2633	1.03e-11	1.52e-10
NOTCH2	0.503317	8.00378	46.2286	1.05e-11	1.54e-10
POLH	0.540407	6.09298	46.1989	1.07e-11	1.56e-10
PLXNC1	-0.79249	4.21894	46.193	1.07e-11	1.57e-10
SYNPO2L	1.69907	1.58147	46.1623	1.09e-11	1.59e-10
RAB11FIP5	0.667996	6.10752	46.0966	1.13e-11	1.64e-10
AMFR	0.574253	6.9067	46.0739	1.14e-11	1.66e-10
SYNE1	0.632284	6.26866	46.0311	1.16e-11	1.69e-10
BCL2L1	0.569773	6.27682	45.9421	1.22e-11	1.77e-10
GPC6	-0.931483	3.73279	45.9091	1.24e-11	1.8e-10
SBDS	0.562795	7.30736	45.8895	1.25e-11	1.81e-10
FADS3	0.704859	6.49344	45.8592	1.27e-11	1.84e-10
MME	-0.535358	10.9139	45.8285	1.29e-11	1.87e-10
NIPSNAP3B	-1.70088	1.43685	45.6574	1.41e-11	2.04e-10
PPARGC1A	-0.983967	2.88419	45.6312	1.43e-11	2.06e-10
TALDO1	0.569554	7.31781	45.5746	1.47e-11	2.12e-10
SLC25A20	0.634902	4.82049	45.5704	1.47e-11	2.12e-10
E2F8	-1.88075	1.29686	45.557	1.48e-11	2.13e-10
SFPQ	-0.472125	7.42262	45.5173	1.51e-11	2.17e-10
TCEB3	0.49059	6.26618	45.4033	1.6e-11	2.3e-10
TPST2	0.596632	5.4994	45.3036	1.69e-11	2.42e-10
EXT2	0.453093	8.00135	45.3033	1.69e-11	2.42e-10
CDC45	-1.07964	2.92677	45.2854	1.7e-11	2.44e-10
ENPP1	-0.800759	4.81295	45.2611	1.72e-11	2.47e-10
MYPN	0.888044	5.23114	45.1594	1.82e-11	2.59e-10
SLC35E1	0.519845	6.18528	45.1062	1.87e-11	2.66e-10
AP1S2	-0.77256	4.99984	45.0701	1.9e-11	2.71e-10
TAF13	0.722378	5.16176	45.0106	1.96e-11	2.79e-10
CDH2	0.640482	6.90464	44.9545	2.02e-11	2.87e-10
NR2F1	-0.764761	4.18303	44.8617	2.11e-11	3e-10
CC2D2A	-0.567977	5.11441	44.8421	2.14e-11	3.03e-10
DEGS1	0.471821	8.10382	44.7666	2.22e-11	3.15e-10
TIMELESS	-0.720705	4.28758	44.6921	2.31e-11	3.26e-10
CLPTM1	0.64765	6.72935	44.671	2.33e-11	3.3e-10
ISOC1	-0.804729	4.15464	44.4975	2.55e-11	3.6e-10
CYP2U1	0.599516	4.84328	44.3717	2.72e-11	3.83e-10
SEC11C	0.722969	4.42701	44.3338	2.77e-11	3.9e-10
EGF	0.816371	3.40037	44.3092	2.8e-11	3.95e-10
PTCHD4	0.816693	3.55499	44.2031	2.96e-11	4.16e-10
H2AFV	-0.513842	6.39883	44.1996	2.97e-11	4.17e-10
CLN8	0.674118	4.70794	44.1943	2.97e-11	4.17e-10
TRIM59	-0.722758	4.84731	44.1488	3.04e-11	4.27e-10
MDK	-0.638963	6.38098	44.1087	3.11e-11	4.35e-10
RBMX	-0.555031	7.07083	44.0744	3.16e-11	4.42e-10
HUNK	-1.16909	2.68079	44.0623	3.18e-11	4.45e-10
OCIAD2	0.661059	4.60783	44.0358	3.22e-11	4.5e-10
GAS2L3	-1.45312	2.20383	44.0321	3.23e-11	4.5e-10
CLTB	0.742908	5.7018	44.0306	3.23e-11	4.5e-10
NT5E	0.488602	8.70373	44.0171	3.26e-11	4.53e-10
ANKRD52	0.516694	7.05307	43.9629	3.35e-11	4.65e-10
PPM1H	1.13698	2.72079	43.8995	3.46e-11	4.8e-10
APOBEC3B	-1.95057	0.854789	43.8692	3.51e-11	4.87e-10
PDE7B	-0.778904	3.96067	43.8237	3.59e-11	4.98e-10
SGIP1	0.496647	6.70261	43.7941	3.65e-11	5.05e-10
CTSS	-0.743664	4.94407	43.744	3.74e-11	5.17e-10
KLHL13	-1.279	2.49613	43.7329	3.76e-11	5.19e-10
HEBP1	0.517593	5.80571	43.7327	3.76e-11	5.19e-10
GLTSCR2	-0.61579	6.32193	43.5803	4.07e-11	5.61e-10
PKD2	0.520371	7.71713	43.5329	4.17e-11	5.74e-10
BRP44	0.684555	5.57941	43.3387	4.6e-11	6.33e-10
NAMPT	-0.531503	8.17957	43.2328	4.86e-11	6.68e-10
PELI2	-1.02316	3.27695	43.2288	4.87e-11	6.68e-10
TRNP1	-0.464026	6.72139	43.2167	4.9e-11	6.72e-10
CPEB2	0.700709	5.58424	43.1711	5.02e-11	6.87e-10
JKAMP	0.587019	6.47653	43.1455	5.08e-11	6.95e-10
MCFD2	0.490888	9.08402	43.1214	5.14e-11	7.03e-10
LMBRD2	0.742613	4.07155	43.099	5.2e-11	7.11e-10
VPS53	0.634759	5.26	43.0213	5.41e-11	7.39e-10
LOC344595	0.713264	4.36156	43.0082	5.45e-11	7.43e-10
MAPRE3	0.825444	4.42477	42.9148	5.72e-11	7.78e-10
GPR125	-0.495143	6.36142	42.8963	5.77e-11	7.85e-10
CREB5	-0.671596	4.73889	42.7835	6.11e-11	8.31e-10
BCYRN1	1.36892	1.7908	42.7541	6.21e-11	8.42e-10
ATP6V1G1	0.462143	6.75368	42.7211	6.31e-11	8.56e-10
C15orf52	0.609326	6.55969	42.7008	6.38e-11	8.64e-10
PCGF5	-0.636238	5.983	42.6791	6.45e-11	8.72e-10
PINK1	0.625162	6.65732	42.6752	6.46e-11	8.73e-10
TRIML2	1.12612	2.21572	42.6587	6.52e-11	8.8e-10
FNDC3B	0.433885	8.50153	42.618	6.65e-11	8.97e-10
SRPX2	0.587934	5.75788	42.5796	6.79e-11	9.14e-10
KDM1A	-0.484472	6.35874	42.5457	6.9e-11	9.29e-10
FZD1	-0.723616	4.34672	42.5208	6.99e-11	9.4e-10
NOMO3	0.973412	2.47872	42.4356	7.3e-11	9.81e-10
GRIA3	0.626649	5.64018	42.3666	7.57e-11	1.02e-09
EPDR1	1.15544	1.87657	42.3603	7.59e-11	1.02e-09
IVL	1.94303	0.301892	42.3548	7.61e-11	1.02e-09
FAM177A1	0.656051	6.34597	42.3517	7.62e-11	1.02e-09
SLC6A6	-0.488888	6.80818	42.3268	7.72e-11	1.03e-09
SERINC3	0.432332	8.01651	42.3184	7.76e-11	1.04e-09
LGALS3	-0.469817	7.72289	42.3051	7.81e-11	1.04e-09
CHPF	0.90263	7.23167	42.2345	8.1e-11	1.08e-09
PDS5B	-0.637359	5.35537	42.2281	8.12e-11	1.08e-09
CDX1	-2.13732	1.18554	42.1768	8.34e-11	1.11e-09
KHDRBS1	-0.477813	7.14622	42.1561	8.43e-11	1.12e-09
ERAP2	-0.570476	5.53848	42.1479	8.46e-11	1.12e-09
NACC2	0.566564	5.42616	42.1046	8.65e-11	1.15e-09
SH3RF1	0.568791	5.23311	42.0681	8.81e-11	1.17e-09
KLF10	-0.565697	5.53359	42.0611	8.85e-11	1.17e-09
FAM214B	0.72945	5.37686	42.0379	8.95e-11	1.18e-09
FAM102B	-0.786796	3.86651	42.0163	9.05e-11	1.19e-09
LDB3	1.06422	2.47892	41.9151	9.53e-11	1.26e-09
PCBP2	-0.449308	8.71811	41.9063	9.58e-11	1.26e-09
HLA-B	-0.576154	9.58533	41.8844	9.68e-11	1.27e-09
MAMDC4	-1.34422	2.29656	41.8782	9.71e-11	1.28e-09
SYNM	0.734079	3.57861	41.8618	9.8e-11	1.29e-09
BRCA2	-1.34452	2.2568	41.8586	9.81e-11	1.29e-09
REEP5	0.472105	7.54144	41.856	9.82e-11	1.29e-09
MGAT5	0.448323	6.69765	41.8016	1.01e-10	1.32e-09
SH3KBP1	-0.555339	5.87345	41.7831	1.02e-10	1.33e-09
LIMK2	0.628835	4.39319	41.4825	1.19e-10	1.55e-09
ITFG1	0.493943	7.45657	41.473	1.2e-10	1.56e-09
PFKP	-0.595744	5.91986	41.445	1.21e-10	1.58e-09
XAF1	-1.21309	5.17226	41.4364	1.22e-10	1.59e-09
DUSP4	-0.47817	6.04478	41.4086	1.24e-10	1.61e-09
C1orf112	-0.982984	2.59118	41.3883	1.25e-10	1.62e-09
PLCD4	-0.95923	2.87036	41.3868	1.25e-10	1.62e-09
WNT16	0.881412	4.00174	41.3833	1.25e-10	1.62e-09
JARID2	-0.639665	4.77885	41.3512	1.27e-10	1.65e-09
ARNTL2	-0.7029	4.83404	41.333	1.28e-10	1.66e-09
FKBP5	-1.20185	2.69084	41.3009	1.31e-10	1.69e-09
TMEM106A	0.82548	3.5776	41.246	1.34e-10	1.74e-09
REV3L	-0.557835	6.84055	41.2009	1.37e-10	1.77e-09
ATP10D	0.498112	6.0966	41.2008	1.37e-10	1.77e-09
CCDC102B	-0.854852	4.33767	41.1909	1.38e-10	1.78e-09
CPPED1	0.560987	5.62203	41.163	1.4e-10	1.8e-09
FLJ38109	2.1315	0.418907	41.1486	1.41e-10	1.81e-09
CHST7	0.92431	2.90222	41.1167	1.43e-10	1.84e-09
FNDC3A	-0.536101	7.73603	41.1114	1.44e-10	1.85e-09
CRNDE	-0.82158	3.85773	41.0893	1.45e-10	1.87e-09
INTU	0.924993	3.5291	41.0259	1.5e-10	1.92e-09
TLE3	-0.78085	4.47306	41.02	1.51e-10	1.93e-09
C5orf30	0.593925	4.94202	41.0107	1.51e-10	1.94e-09
ALPK2	0.4449	7.50446	40.9828	1.54e-10	1.96e-09
PODN	0.733306	6.0697	40.9538	1.56e-10	1.99e-09
ARHGEF6	-0.627317	4.51126	40.8337	1.66e-10	2.11e-09
TRERF1	-0.579829	4.96132	40.7831	1.7e-10	2.17e-09
PIK3IP1	0.646066	4.43651	40.7817	1.7e-10	2.17e-09
UBL5	0.438418	6.66903	40.746	1.73e-10	2.2e-09
ZNF532	-0.464638	6.68075	40.7051	1.77e-10	2.25e-09
ROBO3	-0.845049	3.66422	40.6115	1.86e-10	2.36e-09
CTDSPL2	-0.662165	4.79591	40.6042	1.86e-10	2.36e-09
UBR3	0.578912	6.09663	40.5155	1.95e-10	2.47e-09
DNAJC5	0.577284	6.45522	40.4857	1.98e-10	2.51e-09
UBE2T	-0.823323	3.4759	40.3487	2.12e-10	2.68e-09
GPC1	0.787732	7.17663	40.3469	2.13e-10	2.68e-09
MKL2	-0.669715	4.76913	40.3146	2.16e-10	2.73e-09
MAP2K3	0.71136	6.24269	40.3054	2.17e-10	2.74e-09
TUBA1B	-0.427132	8.36734	40.2748	2.21e-10	2.78e-09
MXD3	-1.45952	1.76183	40.2405	2.25e-10	2.82e-09
SGCE	-0.564065	6.68627	40.2272	2.26e-10	2.84e-09
NXT2	-0.925951	3.26531	40.1004	2.41e-10	3.03e-09
AGPAT5	-0.650432	4.62333	40.0869	2.43e-10	3.05e-09
SLC38A11	1.11369	3.82696	40.076	2.44e-10	3.06e-09
LIPH	3.39775	-0.00113669	40.0572	2.47e-10	3.09e-09
AP1S1	0.517286	6.50368	40.0245	2.51e-10	3.14e-09
KISS1	1.23684	2.0871	40.0232	2.51e-10	3.14e-09
PLA2G12A	0.600779	4.99723	40.0167	2.52e-10	3.14e-09
POMGNT1	0.611954	6.55586	39.9862	2.56e-10	3.19e-09
BTG1	-0.454088	7.04072	39.9338	2.63e-10	3.27e-09
SEMA7A	0.632173	4.68376	39.9234	2.64e-10	3.29e-09
SLC31A2	0.752973	3.72047	39.8732	2.71e-10	3.37e-09
CENPK	-1.01281	3.86132	39.8651	2.72e-10	3.38e-09
PLP1	-1.07435	2.132	39.8521	2.74e-10	3.4e-09
SAT1	0.533496	6.74797	39.8254	2.78e-10	3.44e-09
ADAMTS3	-1.14192	1.9751	39.8206	2.78e-10	3.45e-09
KCNAB2	0.924585	3.15042	39.7919	2.83e-10	3.5e-09
UBE2L6	-0.585695	5.70909	39.7648	2.86e-10	3.54e-09
IL15RA	-1.12958	2.77373	39.7276	2.92e-10	3.61e-09
IL8	-0.602812	8.62888	39.6842	2.99e-10	3.68e-09
NFKB1	-0.483931	6.45849	39.6398	3.05e-10	3.77e-09
COPZ2	0.503426	6.0577	39.5766	3.15e-10	3.89e-09
AHRR	-0.522397	6.58809	39.5279	3.23e-10	3.98e-09
KAL1	-0.916176	3.56488	39.4895	3.3e-10	4.06e-09
MAP1LC3B	0.497399	7.10252	39.4605	3.35e-10	4.11e-09
SERPINH1	-0.516453	9.52694	39.4423	3.38e-10	4.15e-09
ZNF711	-1.56501	1.57715	39.361	3.52e-10	4.32e-09
MPZL1	0.455112	7.95582	39.3329	3.57e-10	4.38e-09
LATS2	0.447677	6.2604	39.3006	3.63e-10	4.45e-09
VAMP3	0.427171	7.647	39.2532	3.72e-10	4.55e-09
CEP57	-0.689517	5.73093	39.243	3.74e-10	4.57e-09
FAM107B	-0.491974	6.04052	39.2406	3.75e-10	4.57e-09
2011-09-01	0.469263	9.82499	39.1626	3.9e-10	4.75e-09
POLQ	-1.01914	2.88002	39.15	3.92e-10	4.78e-09
RTCD1	0.524525	5.96209	39.1077	4.01e-10	4.88e-09
DMPK	0.820578	6.49057	39.0975	4.03e-10	4.9e-09
N4BP2	-1.15943	3.55648	39.052	4.13e-10	5.01e-09
PRKD3	-0.521933	6.77936	39.0304	4.17e-10	5.06e-09
RETSAT	0.575221	5.90732	39.0248	4.18e-10	5.07e-09
ANPEP	-0.600632	9.0554	39.0139	4.21e-10	5.1e-09
LAMC1	0.401517	10.8268	39.0028	4.23e-10	5.12e-09
GPR133	-1.41308	2.04258	38.9373	4.38e-10	5.29e-09
PREX1	-1.00861	3.55325	38.9361	4.38e-10	5.29e-09
SGK223	0.695185	4.62771	38.9306	4.39e-10	5.3e-09
FGF7	-0.554721	5.7366	38.9102	4.44e-10	5.35e-09
WNT5B	0.612137	6.55112	38.9078	4.44e-10	5.35e-09
BTN3A3	-0.785456	3.4855	38.8961	4.47e-10	5.38e-09
FOXP2	-1.08957	2.27662	38.8601	4.55e-10	5.47e-09
PRPS1	0.521288	5.49001	38.8595	4.55e-10	5.47e-09
PARP14	-0.619081	6.63478	38.8541	4.57e-10	5.48e-09
RNF14	0.522029	6.23176	38.8252	4.64e-10	5.56e-09
PTGFR	-0.671229	5.24309	38.8118	4.67e-10	5.59e-09
PLXNB3	0.796276	4.36469	38.7356	4.85e-10	5.81e-09
DBF4	-1.15278	3.68612	38.7216	4.89e-10	5.84e-09
B4GALT4	0.475139	5.86592	38.7024	4.94e-10	5.9e-09
CENPW	-1.16025	2.73201	38.613	5.17e-10	6.17e-09
ARHGAP11B	-2.33425	0.29662	38.5712	5.28e-10	6.3e-09
EDN1	1.11939	2.49513	38.5532	5.33e-10	6.35e-09
MFAP2	-0.64739	6.06798	38.5488	5.34e-10	6.36e-09
OGDH	0.576053	5.8863	38.5107	5.45e-10	6.48e-09
KLHL24	-0.585787	4.98142	38.4944	5.49e-10	6.52e-09
LYPD6B	2.01607	0.62115	38.4841	5.52e-10	6.55e-09
QPRT	0.746094	5.27697	38.4258	5.69e-10	6.75e-09
PTPLA	0.560165	5.56777	38.4055	5.75e-10	6.81e-09
NEXN	0.613399	7.91911	38.403	5.75e-10	6.81e-09
GIPC3	-2.71377	-0.0279709	38.3727	5.84e-10	6.91e-09
IGFBP3	0.438306	8.27814	38.3619	5.88e-10	6.94e-09
RGS2	-0.617469	4.72965	38.3282	5.98e-10	7.06e-09
TBC1D2	0.640412	5.364	38.321	6e-10	7.08e-09
POPDC2	1.75648	0.694125	38.2786	6.13e-10	7.23e-09
ORC1	-1.2811	1.8199	38.2762	6.14e-10	7.23e-09
NDUFB2	0.544245	5.17064	38.2711	6.16e-10	7.24e-09
PBX3	-0.579948	5.428	38.2603	6.19e-10	7.28e-09
NFE2L1	0.449727	9.06224	38.216	6.33e-10	7.43e-09
NFIA	-0.976076	2.96256	38.2157	6.33e-10	7.43e-09
MCM4	-0.477775	5.96735	38.2089	6.36e-10	7.45e-09
KANK1	0.453376	6.19346	38.1693	6.49e-10	7.6e-09
CCDC14	0.464141	7.59413	38.1454	6.57e-10	7.68e-09
DLG3	-0.675023	4.56766	38.0386	6.94e-10	8.11e-09
TMEM63B	0.576985	5.3305	38.0179	7.01e-10	8.19e-09
DNM3OS	-0.83509	5.89231	37.9555	7.24e-10	8.44e-09
RARRES3	-1.30409	1.7595	37.9542	7.24e-10	8.44e-09
CNIH3	-1.39713	3.34071	37.9278	7.34e-10	8.55e-09
NR1D1	-1.05521	2.66013	37.9098	7.41e-10	8.62e-09
ASCC3	0.483115	7.96594	37.8943	7.47e-10	8.68e-09
NNMT	-0.458326	7.41233	37.8735	7.55e-10	8.77e-09
E2F2	-1.82859	0.844867	37.8427	7.67e-10	8.9e-09
ZNF618	-0.552176	5.09469	37.8262	7.73e-10	8.97e-09
NUP54	-0.594776	5.49166	37.7718	7.95e-10	9.21e-09
SHROOM2	-1.01544	3.44459	37.7675	7.97e-10	9.23e-09
CTCF	-0.561821	5.34268	37.7357	8.1e-10	9.37e-09
DDX24	0.399056	7.52659	37.6607	8.42e-10	9.73e-09
SERINC2	0.877302	7.39877	37.647	8.48e-10	9.79e-09
NAA10	0.52892	5.5312	37.6006	8.68e-10	1e-08
TYMS	-0.728615	4.213	37.5667	8.83e-10	1.02e-08
TMBIM1	0.498873	7.43841	37.5297	9e-10	1.04e-08
TMEM194B	-1.07586	3.16661	37.4454	9.4e-10	1.08e-08
FBXO11	-0.495539	6.67631	37.4125	9.56e-10	1.1e-08
DSTN	0.510904	9.85092	37.3918	9.66e-10	1.11e-08
CREBZF	-0.493772	6.61627	37.3799	9.72e-10	1.12e-08
NOMO1	0.570844	5.55008	37.3641	9.8e-10	1.12e-08
SRSF7	-0.45505	6.32152	37.364	9.8e-10	1.12e-08
RAB31	-0.472139	6.99145	37.3611	9.82e-10	1.12e-08
ELK3	-0.507447	5.86002	37.3206	1e-09	1.15e-08
KIF22	-0.77868	4.00868	37.3134	1.01e-09	1.15e-08
TEAD2	-0.601745	5.07282	37.3096	1.01e-09	1.15e-08
SDK1	-1.17749	2.89964	37.2839	1.02e-09	1.16e-08
MCM5	-0.90776	4.12553	37.2293	1.05e-09	1.2e-08
LOC375010	1.73652	0.776062	37.2022	1.06e-09	1.21e-08
DMD	0.831897	3.59768	37.1955	1.07e-09	1.22e-08
PRKG1	-0.573012	5.09429	37.1825	1.08e-09	1.22e-08
TCF21	-1.23243	2.1526	37.1766	1.08e-09	1.23e-08
NALCN	1.55982	0.710644	37.1611	1.09e-09	1.23e-08
ARRDC2	-0.84432	3.55773	37.1244	1.11e-09	1.26e-08
C15orf17	0.451014	6.08908	37.1191	1.11e-09	1.26e-08
AP1B1	0.593975	6.22939	37.107	1.12e-09	1.27e-08
RND3	0.44408	9.95374	37.0448	1.15e-09	1.31e-08
CABYR	0.717329	3.61365	37.0383	1.16e-09	1.31e-08
HNRNPA2B1	-0.449978	9.52603	36.9715	1.2e-09	1.35e-08
EPB41L4B	-1.39706	1.68851	36.9638	1.2e-09	1.36e-08
ABHD12	0.509263	6.15594	36.9617	1.2e-09	1.36e-08
HSD17B12	0.485616	7.19415	36.9527	1.21e-09	1.36e-08
IFIH1	-1.04197	4.42132	36.9518	1.21e-09	1.36e-08
ELF2	-0.590546	4.99606	36.949	1.21e-09	1.36e-08
CLU	-0.649738	9.4439	36.8091	1.3e-09	1.46e-08
ANO3	0.952619	2.19043	36.804	1.31e-09	1.47e-08
ATP5J2	0.528717	5.57224	36.7804	1.32e-09	1.48e-08
CDCA7L	-0.66182	4.42776	36.7371	1.35e-09	1.51e-08
PRDX2	0.648753	6.87076	36.724	1.36e-09	1.52e-08
ODZ4	-0.794126	4.00084	36.724	1.36e-09	1.52e-08
DDX60	-0.96074	5.0423	36.6919	1.38e-09	1.55e-08
ITGA11	0.519623	7.93639	36.6804	1.39e-09	1.55e-08
LOC344887	1.61579	1.4589	36.6461	1.42e-09	1.58e-08
ARMC4	0.64156	4.72829	36.5445	1.49e-09	1.66e-08
USP3	-0.680937	4.55264	36.5061	1.52e-09	1.69e-08
NDRG3	0.50342	5.80909	36.4606	1.56e-09	1.73e-08
GDF15	0.846658	5.29862	36.4257	1.59e-09	1.76e-08
CDK2	-0.5068	5.31014	36.3588	1.64e-09	1.82e-08
GPR126	-0.611308	4.99704	36.3526	1.65e-09	1.83e-08
AFF1	0.474519	6.57025	36.3195	1.67e-09	1.86e-08
SPRYD3	0.688957	4.89177	36.2219	1.76e-09	1.95e-08
PLAG1	-0.657208	4.91394	36.1858	1.79e-09	1.99e-08
PFKFB3	-0.468496	6.0085	36.1629	1.81e-09	2.01e-08
ZNF236	-0.736813	3.46244	36.1592	1.82e-09	2.01e-08
ETFB	0.665987	5.16837	36.1544	1.82e-09	2.01e-08
RAB8B	-0.524648	6.28649	36.0808	1.89e-09	2.09e-08
RFC5	-0.875261	3.38513	36.0662	1.91e-09	2.1e-08
GLIPR2	-0.599548	4.82724	36.0278	1.95e-09	2.14e-08
CITED2	0.41704	8.85366	36.0182	1.95e-09	2.15e-08
PTBP2	-0.687443	3.83436	36.0025	1.97e-09	2.17e-08
CENPT	0.62795	5.42626	35.9986	1.97e-09	2.17e-08
IQCD	-1.56424	1.20487	35.9794	1.99e-09	2.19e-08
EPB41L1	0.51771	5.47613	35.9514	2.02e-09	2.22e-08
SMPD1	0.639703	6.88484	35.8613	2.12e-09	2.32e-08
PPPDE2	0.499286	5.82579	35.8412	2.14e-09	2.34e-08
SH3RF3	-0.565853	4.85979	35.7914	2.2e-09	2.4e-08
NPR3	-1.48015	1.23519	35.7853	2.2e-09	2.41e-08
DPH3	0.466442	6.63988	35.7816	2.21e-09	2.41e-08
ATPIF1	0.50758	6.26917	35.7703	2.22e-09	2.42e-08
NCS1	0.535231	5.90973	35.7661	2.22e-09	2.43e-08
POLA1	-0.742551	3.65101	35.7642	2.23e-09	2.43e-08
TBC1D19	0.807231	4.83327	35.7444	2.25e-09	2.45e-08
PIGZ	0.986481	3.46201	35.7409	2.25e-09	2.45e-08
AMOT	-0.783983	3.55723	35.697	2.31e-09	2.5e-08
CRTC3	-0.562913	5.45703	35.6947	2.31e-09	2.51e-08
C11orf54	-0.631883	4.75251	35.6523	2.36e-09	2.56e-08
ALDH3A1	1.58655	3.16262	35.6358	2.38e-09	2.58e-08
MFHAS1	-0.578191	4.5971	35.6125	2.41e-09	2.61e-08
KCTD12	-0.9662	3.74577	35.5914	2.43e-09	2.63e-08
PDGFRB	-0.524045	8.6918	35.5572	2.48e-09	2.68e-08
CEP128	-1.24423	2.0487	35.5526	2.48e-09	2.68e-08
CNOT6	-0.559774	5.31259	35.5523	2.48e-09	2.68e-08
UCHL3	0.641352	5.08728	35.5318	2.51e-09	2.71e-08
MLLT4	-0.528894	5.23844	35.5218	2.52e-09	2.72e-08
CSRP1	0.440803	8.66326	35.508	2.54e-09	2.74e-08
IFT80	-0.547377	6.55913	35.4984	2.55e-09	2.75e-08
TTC3P1	1.75908	0.531123	35.4943	2.56e-09	2.75e-08
SLC10A7	-0.737981	3.55511	35.4741	2.58e-09	2.78e-08
TSC22D3	0.654573	4.19811	35.449	2.62e-09	2.81e-08
LOXL2	0.492571	9.42328	35.4481	2.62e-09	2.81e-08
SMOX	-0.854328	4.59586	35.4099	2.67e-09	2.86e-08
LOC729178	1.30888	1.35635	35.397	2.69e-09	2.88e-08
DENND2A	-0.527127	5.78546	35.3954	2.69e-09	2.88e-08
AXL	-0.41931	7.91872	35.3876	2.7e-09	2.89e-08
DDR2	0.422342	7.3322	35.3792	2.71e-09	2.9e-08
FXR2	0.533354	5.58212	35.3444	2.76e-09	2.95e-08
FAM76B	-0.802697	4.29317	35.3255	2.79e-09	2.97e-08
COX7A1	1.01645	3.09548	35.3088	2.81e-09	3e-08
GMPS	-0.525946	5.97038	35.2978	2.83e-09	3.01e-08
DYNLT3	0.54867	6.8667	35.2813	2.85e-09	3.04e-08
TRIM22	0.433761	7.57976	35.247	2.9e-09	3.09e-08
FAIM3	-1.73482	0.678955	35.2401	2.91e-09	3.1e-08
COLEC12	-0.446182	7.86837	35.208	2.96e-09	3.14e-08
SYPL2	0.583491	4.5148	35.1854	3e-09	3.18e-08
CPNE2	-0.645019	4.66119	35.1533	3.05e-09	3.23e-08
HSD17B14	0.747528	3.29401	35.1119	3.11e-09	3.3e-08
TAC3	-1.25894	2.12517	35.0779	3.17e-09	3.35e-08
ATP2B1	-0.473097	8.66898	35.0584	3.2e-09	3.38e-08
PABPC4L	-1.02346	2.64208	35.0564	3.2e-09	3.38e-08
DDX11	-0.861272	2.94554	35.0536	3.21e-09	3.38e-08
RUSC2	0.68949	5.82178	35.0017	3.29e-09	3.47e-08
SETD7	0.441712	7.36482	34.9831	3.33e-09	3.5e-08
DDRGK1	0.665823	4.91127	34.9808	3.33e-09	3.5e-08
ZNF697	-0.633292	4.65147	34.974	3.34e-09	3.51e-08
PMP22	-0.470516	6.17563	34.9662	3.35e-09	3.53e-08
OSTM1	0.601358	6.16844	34.9512	3.38e-09	3.55e-08
FAM98A	0.441905	7.41789	34.8964	3.48e-09	3.65e-08
TNFAIP8L1	-0.807969	3.26792	34.8879	3.49e-09	3.66e-08
ITGA10	-1.35986	1.76225	34.8494	3.56e-09	3.73e-08
CALCRL	-2.23866	0.339998	34.8201	3.62e-09	3.78e-08
GDF6	0.836688	2.76764	34.6967	3.85e-09	4.03e-08
LOC100132891	-0.777146	4.13611	34.6668	3.91e-09	4.09e-08
ME1	0.517766	6.0757	34.662	3.92e-09	4.1e-08
OCRL	0.424893	6.38277	34.6312	3.98e-09	4.16e-08
MYO5A	0.467586	6.56383	34.6176	4.01e-09	4.18e-08
GDF5	-0.673436	4.95054	34.5983	4.05e-09	4.22e-08
HELLS	-1.20816	3.32994	34.5468	4.16e-09	4.33e-08
SCAMP3	0.616357	5.92426	34.5265	4.2e-09	4.37e-08
MAZ	-0.502556	6.49534	34.5203	4.22e-09	4.38e-08
OAZ2	0.419811	7.03925	34.4552	4.36e-09	4.53e-08
LARP6	0.453851	6.54543	34.4424	4.39e-09	4.56e-08
EMP1	-0.427552	8.21827	34.4266	4.43e-09	4.59e-08
LEPRE1	-0.533473	7.41463	34.4244	4.43e-09	4.59e-08
BNC2	-0.493783	5.81447	34.4154	4.45e-09	4.61e-08
BARD1	-1.09361	2.15503	34.3844	4.52e-09	4.68e-08
DNAJB1	0.405077	6.65653	34.3715	4.55e-09	4.7e-08
SH3TC2	0.960178	2.86747	34.3707	4.56e-09	4.7e-08
SNX9	-0.413959	7.28073	34.3317	4.65e-09	4.8e-08
SORBS1	1.43416	0.869516	34.3036	4.71e-09	4.86e-08
F2R	-0.412252	7.50511	34.2977	4.73e-09	4.87e-08
CPS1	-1.08904	3.1964	34.2817	4.77e-09	4.91e-08
BDNF	0.407811	6.46631	34.2719	4.79e-09	4.93e-08
VASH1	-0.721122	3.88879	34.1874	5.01e-09	5.14e-08
C18orf54	-1.11016	2.75383	34.1508	5.1e-09	5.24e-08
P2RX4	-0.688875	4.08465	34.1472	5.11e-09	5.24e-08
TMOD2	0.683025	4.18629	34.144	5.12e-09	5.25e-08
DHRS3	0.705193	3.14241	34.0914	5.26e-09	5.39e-08
ANO4	0.798912	3.79533	34.0872	5.27e-09	5.39e-08
PARP9	-0.754384	5.76309	34.0833	5.28e-09	5.4e-08
EXOSC8	-0.676122	4.10279	34.0712	5.31e-09	5.43e-08
CRABP2	-0.555011	8.15917	34.0676	5.32e-09	5.44e-08
TNC	-0.485804	10.0348	34.0609	5.34e-09	5.45e-08
CNST	0.477291	5.83254	34.0412	5.4e-09	5.5e-08
LOC100506746	0.998968	1.92586	34.04	5.4e-09	5.5e-08
NLGN1	-0.686723	3.74478	34.0394	5.4e-09	5.5e-08
MRPL33	0.54442	5.87504	34.0133	5.47e-09	5.57e-08
C17orf89	0.658213	4.43048	33.9947	5.53e-09	5.62e-08
ALG10B	-0.945952	3.21112	33.9781	5.57e-09	5.66e-08
C3orf58	-0.786654	4.15827	33.9745	5.58e-09	5.67e-08
GNPTAB	0.448251	7.43536	33.9571	5.63e-09	5.71e-08
CREB3	0.476602	6.21316	33.9295	5.71e-09	5.79e-08
FDPS	0.486155	6.26902	33.881	5.86e-09	5.93e-08
DNAJC30	0.664217	4.04032	33.863	5.91e-09	5.98e-08
GYS1	0.615608	5.65266	33.8527	5.94e-09	6.01e-08
KIAA0528	-0.552854	5.17115	33.8297	6.02e-09	6.08e-08
C9orf3	0.522381	5.28348	33.7917	6.13e-09	6.19e-08
PPIA	0.381079	9.73766	33.7516	6.26e-09	6.32e-08
ATF1	-0.619753	4.95352	33.7292	6.33e-09	6.39e-08
MBOAT7	0.665756	6.50829	33.6995	6.43e-09	6.48e-08
KCNAB3	-1.41123	1.66304	33.6889	6.47e-09	6.51e-08
ADAMTS15	-1.16781	1.60459	33.6355	6.65e-09	6.68e-08
CYB5R3	0.663205	8.19068	33.5642	6.9e-09	6.93e-08
AGBL2	-1.50995	0.877504	33.5247	7.04e-09	7.07e-08
FBXO9	0.47574	6.63197	33.5175	7.06e-09	7.09e-08
PDE7A	-0.804525	3.53574	33.5054	7.11e-09	7.13e-08
PEX3	0.573631	4.95312	33.4687	7.24e-09	7.25e-08
TOLLIP	0.625301	5.20802	33.4674	7.25e-09	7.25e-08
NAB1	-0.537591	6.34852	33.4664	7.25e-09	7.25e-08
YKT6	0.403919	7.13428	33.4545	7.29e-09	7.29e-08
NUAK1	0.640345	5.29812	33.4185	7.43e-09	7.42e-08
ARL13B	-0.829223	3.49586	33.3936	7.53e-09	7.51e-08
C22orf25	0.849387	3.99675	33.3876	7.55e-09	7.53e-08
IRF2	-0.594238	4.68401	33.3863	7.56e-09	7.53e-08
TCEAL3	0.475088	5.30788	33.3791	7.58e-09	7.55e-08
STIL	-0.862915	3.68907	33.368	7.63e-09	7.59e-08
B3GNT2	0.575106	4.44083	33.3139	7.84e-09	7.8e-08
LRRFIP2	0.480896	7.02498	33.2265	8.2e-09	8.15e-08
DYNLL2	0.484813	5.96021	33.2246	8.21e-09	8.15e-08
MMP19	-0.543546	4.7318	33.1993	8.32e-09	8.25e-08
ZNHIT1	0.506489	5.79739	33.1806	8.4e-09	8.32e-08
CAMK2D	0.449839	6.90257	33.1745	8.42e-09	8.34e-08
IL4I1	-1.30628	1.8113	33.1684	8.45e-09	8.36e-08
METRNL	-0.749239	4.14646	33.1642	8.47e-09	8.38e-08
ALX1	-1.28691	1.36604	33.1067	8.72e-09	8.62e-08
PNPO	0.594747	4.30736	33.0717	8.88e-09	8.77e-08
LRRCC1	-1.20099	2.86337	33.0663	8.91e-09	8.79e-08
ZNF521	-0.592662	5.23287	33.0408	9.02e-09	8.9e-08
TANC2	0.462804	6.05776	32.9929	9.25e-09	9.11e-08
HNRNPA0	-0.405644	6.86315	32.9506	9.45e-09	9.31e-08
KIAA1191	0.406201	7.13073	32.8739	9.83e-09	9.67e-08
KCTD3	-0.478437	5.8556	32.79	1.03e-08	1.01e-07
PCYT2	0.911337	4.53193	32.7553	1.05e-08	1.03e-07
TMEM65	-0.592299	5.04059	32.7543	1.05e-08	1.03e-07
PSMD2	0.451334	8.15201	32.7425	1.05e-08	1.03e-07
NME4	0.564547	6.67403	32.7262	1.06e-08	1.04e-07
NFAT5	0.471383	7.50326	32.6771	1.09e-08	1.06e-07
ZSCAN18	0.7209	4.01496	32.6769	1.09e-08	1.06e-07
NUP160	-0.490265	5.41057	32.6625	1.1e-08	1.07e-07
PSMB8	-0.700671	5.08619	32.6523	1.1e-08	1.08e-07
RNF24	-0.476679	5.28863	32.6292	1.12e-08	1.09e-07
MMP24	0.58238	4.61721	32.6158	1.12e-08	1.1e-07
KCNJ2	0.760036	4.28879	32.5819	1.14e-08	1.11e-07
TMEM64	-0.622995	4.79212	32.5432	1.17e-08	1.14e-07
HNRNPR	-0.401734	7.47217	32.5099	1.19e-08	1.15e-07
MPP5	0.482749	6.23465	32.5055	1.19e-08	1.16e-07
PSMB5	0.460024	6.92074	32.4874	1.2e-08	1.17e-07
EML4	-0.51078	6.25877	32.465	1.21e-08	1.18e-07
SMAD4	-0.426805	6.3289	32.4558	1.22e-08	1.18e-07
COX6A1	0.407971	6.75244	32.4391	1.23e-08	1.19e-07
PDZRN3	-0.501025	5.51041	32.4243	1.24e-08	1.2e-07
CES2	0.473781	5.82999	32.4189	1.24e-08	1.2e-07
NUDT21	-0.507997	7.06636	32.3993	1.26e-08	1.21e-07
ANAPC13	0.476134	7.0473	32.3868	1.26e-08	1.22e-07
DCTN3	0.475748	5.46052	32.3858	1.26e-08	1.22e-07
CKAP4	0.385508	9.6226	32.3525	1.29e-08	1.24e-07
GABARAPL2	0.407336	6.52638	32.3511	1.29e-08	1.24e-07
SLC43A1	-0.742786	3.35955	32.2209	1.38e-08	1.33e-07
IL34	-1.09521	2.03173	32.1981	1.39e-08	1.34e-07
FOXP1	-0.521472	5.42491	32.1923	1.4e-08	1.34e-07
UQCRQ	0.401707	6.3072	32.1874	1.4e-08	1.35e-07
GDE1	0.399739	7.33731	32.1227	1.45e-08	1.39e-07
SUMO2	-0.456463	7.485	32.1131	1.45e-08	1.4e-07
LOC100506023	1.23571	1.26738	32.1027	1.46e-08	1.4e-07
PITPNC1	-0.787914	3.09625	32.0888	1.47e-08	1.41e-07
ARHGAP32	-0.708395	3.81628	32.0486	1.5e-08	1.44e-07
SMCR7	0.878639	3.15548	32.0183	1.53e-08	1.46e-07
KIAA0415	0.657958	4.79312	31.9874	1.55e-08	1.48e-07
PITRM1	0.404086	6.71956	31.9869	1.55e-08	1.48e-07
PRNP	0.380418	8.87832	31.9833	1.56e-08	1.49e-07
RNF167	0.505076	5.77243	31.9292	1.6e-08	1.53e-07
CCRL1	-0.505729	4.9808	31.929	1.6e-08	1.53e-07
GLI1	-1.66642	1.79566	31.8896	1.63e-08	1.56e-07
VDAC2	0.411455	7.65762	31.8835	1.64e-08	1.56e-07
LRP10	0.597271	8.29634	31.8757	1.64e-08	1.57e-07
FGF5	-0.504248	6.00289	31.8659	1.65e-08	1.57e-07
TRIM32	0.468905	5.83089	31.8546	1.66e-08	1.58e-07
SYNGR3	-1.38117	1.35865	31.8355	1.68e-08	1.59e-07
GRHL1	-0.874992	2.23335	31.8123	1.7e-08	1.61e-07
MIOS	-0.593337	4.78662	31.8013	1.71e-08	1.62e-07
C1orf21	-0.618375	4.84126	31.7951	1.71e-08	1.62e-07
PATL1	-0.413685	6.53027	31.781	1.73e-08	1.64e-07
DAZAP2	-0.399533	6.91049	31.7489	1.75e-08	1.66e-07
SYNGR2	0.687705	5.38209	31.7068	1.79e-08	1.7e-07
HMGA1	-0.491444	8.22336	31.6782	1.82e-08	1.72e-07
ECT2	-0.567104	6.06471	31.6534	1.84e-08	1.74e-07
IRF1	-0.537605	4.6893	31.6405	1.86e-08	1.75e-07
RASA3	-0.432709	6.12955	31.6369	1.86e-08	1.75e-07
BACH2	-2.30072	0.535825	31.623	1.87e-08	1.76e-07
IDH1	-0.417636	6.8402	31.5938	1.9e-08	1.79e-07
TFAP4	-1.1952	1.86172	31.5633	1.93e-08	1.82e-07
CENPO	-0.708297	3.82729	31.5426	1.95e-08	1.84e-07
TSPAN11	-0.773947	4.18091	31.5276	1.97e-08	1.85e-07
PEX19	0.40287	6.43726	31.5203	1.97e-08	1.85e-07
ARMCX3	0.412562	7.63273	31.4568	2.04e-08	1.91e-07
NCALD	-1.48481	1.34257	31.4147	2.08e-08	1.95e-07
TEX29	-2.32091	0.0656806	31.3666	2.14e-08	2e-07
RBM7	-0.594251	5.73648	31.3502	2.15e-08	2.02e-07
SYT7	-1.27882	1.67587	31.336	2.17e-08	2.03e-07
APBB2	0.424399	6.19975	31.3222	2.19e-08	2.04e-07
CMTM4	0.482367	5.35629	31.1992	2.33e-08	2.18e-07
DBNDD1	0.928689	2.87754	31.1924	2.34e-08	2.18e-07
BGN	-0.52012	9.15622	31.1383	2.4e-08	2.24e-07
SLC25A23	0.478011	5.76461	31.1059	2.44e-08	2.28e-07
SEMA4B	-0.722824	3.8874	31.0824	2.47e-08	2.3e-07
ARF4	0.416855	9.42732	31.0718	2.49e-08	2.32e-07
PDE4B	-0.495652	5.07589	31.0512	2.51e-08	2.34e-07
LPIN1	0.439226	6.04721	31.034	2.54e-08	2.36e-07
ABCA1	0.435769	5.79405	31.0309	2.54e-08	2.36e-07
PCDHGA4	0.781221	2.9091	31.006	2.57e-08	2.39e-07
JPH2	0.649847	4.65688	30.9983	2.58e-08	2.4e-07
USP37	-0.764913	3.62817	30.9922	2.59e-08	2.4e-07
PALLD	0.367449	9.05131	30.974	2.62e-08	2.42e-07
CBFB	-0.592392	5.4846	30.9699	2.62e-08	2.43e-07
LACTB	0.606693	4.73797	30.942	2.66e-08	2.46e-07
PC	-0.690563	4.63354	30.9377	2.66e-08	2.46e-07
RAB20	-1.19584	1.49795	30.93	2.68e-08	2.47e-07
TSKU	-0.62553	5.11166	30.9151	2.7e-08	2.49e-07
GPC2	-1.60545	0.993012	30.8805	2.74e-08	2.53e-07
SCN11A	-1.18532	0.982489	30.867	2.76e-08	2.55e-07
CKB	1.17858	2.52574	30.8477	2.79e-08	2.57e-07
MEX3A	-0.733211	3.77791	30.8465	2.79e-08	2.57e-07
C4orf46	-0.683987	4.02222	30.8464	2.79e-08	2.57e-07
PPP1R7	0.414152	6.0215	30.8282	2.82e-08	2.59e-07
HNRNPUL1	-0.385709	7.5809	30.8204	2.83e-08	2.6e-07
FDFT1	0.388364	6.64944	30.8002	2.86e-08	2.63e-07
CDK6	0.566236	7.3246	30.7797	2.89e-08	2.65e-07
PARPBP	-0.873029	2.75956	30.7554	2.93e-08	2.68e-07
LOC283299	2.32638	-0.263705	30.6682	3.06e-08	2.81e-07
SMAD3	-0.427962	8.14135	30.5766	3.21e-08	2.94e-07
PBX2	-0.445071	6.62081	30.5057	3.33e-08	3.05e-07
ABCA3	1.2603	1.38096	30.4965	3.34e-08	3.06e-07
CD44	0.379723	10.7296	30.485	3.36e-08	3.07e-07
C3orf52	0.791671	2.91327	30.4839	3.37e-08	3.07e-07
DAGLB	0.721677	4.1418	30.4516	3.42e-08	3.12e-07
TWIST1	-0.748477	3.88958	30.4357	3.45e-08	3.15e-07
CLCC1	0.448296	5.93548	30.4022	3.51e-08	3.2e-07
DSP	0.503182	6.73256	30.3966	3.52e-08	3.21e-07
MAP2K1	0.433758	5.90744	30.3617	3.59e-08	3.26e-07
MAN2B2	0.507083	7.09958	30.3271	3.65e-08	3.32e-07
RPL3	-0.377846	10.4484	30.3024	3.7e-08	3.36e-07
PLEKHA5	-0.490701	5.46726	30.284	3.73e-08	3.39e-07
HUWE1	0.459226	7.70982	30.2644	3.77e-08	3.42e-07
TNFAIP1	0.435879	6.66865	30.2536	3.79e-08	3.44e-07
PHKB	0.413543	6.53722	30.2461	3.81e-08	3.45e-07
CHSY1	-0.431329	5.92067	30.2426	3.81e-08	3.45e-07
MNS1	-1.33315	1.55586	30.2189	3.86e-08	3.49e-07
CYLD	0.430059	6.38833	30.1994	3.9e-08	3.53e-07
PON2	0.466671	7.05925	30.1299	4.04e-08	3.65e-07
MTRNR2L1	0.49878	6.40111	30.1281	4.04e-08	3.65e-07
KIAA1609	0.428924	5.61598	30.1211	4.06e-08	3.66e-07
TM4SF18	1.58106	0.43762	30.0859	4.13e-08	3.73e-07
CERS5	0.432839	5.64483	30.038	4.24e-08	3.82e-07
NAIP	-0.780609	3.19664	30.0102	4.3e-08	3.87e-07
HIST1H2BG	1.90379	0.653157	29.9957	4.33e-08	3.9e-07
BRD3	-0.514087	4.84751	29.9891	4.34e-08	3.91e-07
SNX11	0.589072	4.35833	29.9629	4.4e-08	3.96e-07
RTKN2	-0.983836	2.57647	29.9608	4.41e-08	3.96e-07
ATP6V0C	0.565268	6.2906	29.9562	4.42e-08	3.97e-07
FLJ44054	1.74535	0.972995	29.9548	4.42e-08	3.97e-07
KCNT2	-1.41715	1.4929	29.9499	4.43e-08	3.97e-07
MXRA5	-0.411238	9.36401	29.9449	4.44e-08	3.98e-07
BSDC1	0.473055	6.49019	29.9352	4.47e-08	4e-07
SH3GL2	0.582215	4.33126	29.9323	4.47e-08	4e-07
ETAA1	-0.641253	5.04047	29.9287	4.48e-08	4.01e-07
OIP5	-1.55787	1.47433	29.8593	4.65e-08	4.15e-07
IVD	0.426941	6.17517	29.853	4.66e-08	4.16e-07
G6PC3	0.573608	5.56048	29.7956	4.8e-08	4.28e-07
DTX3L	-0.633966	6.11203	29.7825	4.83e-08	4.31e-07
DCUN1D3	0.590581	4.52425	29.7673	4.87e-08	4.34e-07
RMI2	-0.678608	3.27116	29.7551	4.9e-08	4.36e-07
TERF2IP	0.42855	6.50781	29.7305	4.96e-08	4.42e-07
ARSB	0.425304	5.58588	29.7061	5.03e-08	4.47e-07
TMEM39B	-0.758244	3.56938	29.7017	5.04e-08	4.48e-07
CCL2	-0.362863	9.54282	29.6972	5.05e-08	4.48e-07
PTEN	-0.530416	6.826	29.6833	5.09e-08	4.51e-07
DHDDS	0.4412	5.45861	29.6532	5.17e-08	4.58e-07
C3orf78	0.891042	2.46686	29.6413	5.2e-08	4.61e-07
KRT18	0.483776	6.751	29.6247	5.24e-08	4.64e-07
LHFP	0.433365	6.95412	29.5929	5.33e-08	4.72e-07
LUC7L	-0.561443	4.78156	29.5889	5.34e-08	4.72e-07
MAL2	-1.04561	1.59464	29.5818	5.36e-08	4.74e-07
C11orf67	0.690384	3.55969	29.5594	5.42e-08	4.79e-07
B4GALT6	1.98941	-0.00289402	29.5119	5.56e-08	4.9e-07
MOAP1	0.571374	4.75234	29.4873	5.63e-08	4.96e-07
PIF1	-0.966239	2.54137	29.4827	5.64e-08	4.97e-07
PROCR	-0.607355	4.53341	29.4251	5.81e-08	5.12e-07
SEL1L3	0.533944	4.67663	29.4222	5.82e-08	5.12e-07
PRRT3	0.899193	3.47404	29.4071	5.87e-08	5.16e-07
DPYD	-0.577046	4.86895	29.4052	5.87e-08	5.16e-07
COL18A1	-0.702202	7.22556	29.4033	5.88e-08	5.16e-07
RPL10A	-0.34756	9.26104	29.3637	6e-08	5.26e-07
PAQR5	-0.665321	3.67165	29.3594	6.01e-08	5.27e-07
FITM2	0.96881	2.08198	29.3091	6.17e-08	5.41e-07
CCDC18	-0.76343	3.42456	29.2884	6.24e-08	5.46e-07
CCDC117	-0.556523	5.53023	29.2882	6.24e-08	5.46e-07
GRAMD3	0.464705	6.61364	29.2685	6.3e-08	5.51e-07
AP2M1	0.429669	8.80278	29.2174	6.47e-08	5.66e-07
CLK1	-0.515302	6.70041	29.2159	6.47e-08	5.66e-07
HMSD	-2.01779	0.282809	29.2064	6.51e-08	5.68e-07
MDC1	-0.516197	4.85635	29.2044	6.51e-08	5.68e-07
ARL6IP6	-0.642798	4.21061	29.1897	6.56e-08	5.72e-07
PRADC1	0.810656	2.83352	29.1707	6.63e-08	5.77e-07
PTRH2	0.533449	4.70056	29.1042	6.86e-08	5.97e-07
CCNF	-0.897974	3.2409	29.0775	6.95e-08	6.05e-07
MEIS3P1	-0.605655	4.48233	29.0513	7.05e-08	6.13e-07
CHEK1	-0.516882	5.21293	29.0444	7.07e-08	6.15e-07
NTN4	0.370898	8.91355	29.0377	7.1e-08	6.16e-07
SPRYD7	0.628657	4.61553	29.0369	7.1e-08	6.16e-07
SLC36A4	-0.566234	4.22129	29.0335	7.11e-08	6.17e-07
MLF2	0.457662	7.41563	29.0197	7.16e-08	6.21e-07
FBXL19-AS1	0.799205	2.52142	29.0072	7.21e-08	6.24e-07
PPP2R5A	-0.500226	5.82861	29.0061	7.21e-08	6.24e-07
LACTB2	0.628115	4.26489	29.0058	7.22e-08	6.24e-07
DAPK1	0.665738	3.48669	28.9371	7.48e-08	6.46e-07
SRPX	-0.451623	5.82507	28.937	7.48e-08	6.46e-07
ELF3	-0.79188	3.04504	28.9293	7.51e-08	6.48e-07
HSPB3	0.8942	3.16263	28.8484	7.83e-08	6.75e-07
XRCC6BP1	-1.04611	2.04762	28.8473	7.83e-08	6.75e-07
ZNF639	-0.523156	5.13258	28.8296	7.9e-08	6.81e-07
GCLM	0.502002	6.10031	28.8173	7.95e-08	6.85e-07
ULBP2	0.946278	2.24134	28.8057	8e-08	6.88e-07
CAT	0.39926	6.2253	28.7994	8.03e-08	6.9e-07
CNOT6L	-0.580149	4.76319	28.788	8.07e-08	6.94e-07
CERCAM	0.649581	7.40665	28.7726	8.14e-08	6.99e-07
RUNX2	-0.679646	3.87805	28.7696	8.15e-08	6.99e-07
SLC7A11	0.473929	7.23468	28.7682	8.16e-08	7e-07
GLA	0.654951	4.62932	28.7378	8.29e-08	7.1e-07
MYL6	0.438957	10.1675	28.7313	8.32e-08	7.12e-07
LOC100506874	1.10233	1.15052	28.7187	8.37e-08	7.16e-07
CDC7	-1.04049	2.94602	28.7025	8.44e-08	7.22e-07
SMC3	-0.493196	6.36034	28.7018	8.44e-08	7.22e-07
FKBP1A	0.34606	8.32393	28.6983	8.46e-08	7.22e-07
BHMT2	0.578858	4.57492	28.653	8.66e-08	7.39e-07
AKIRIN1	0.385432	6.82631	28.6529	8.66e-08	7.39e-07
ETS2	-0.440726	6.43328	28.6422	8.71e-08	7.42e-07
MYL12A	0.411641	9.13293	28.6168	8.82e-08	7.52e-07
NKIRAS1	0.600918	4.52082	28.5926	8.93e-08	7.6e-07
WSB1	-0.360304	7.28447	28.5913	8.94e-08	7.6e-07
OAZ1	0.391615	8.91109	28.5733	9.02e-08	7.67e-07
TES	0.403912	6.50153	28.5579	9.09e-08	7.73e-07
CHAC1	-0.608288	5.73747	28.4922	9.41e-08	7.98e-07
RNF157	-1.06587	2.01238	28.4921	9.41e-08	7.98e-07
NFATC4	-0.544329	6.79247	28.4433	9.65e-08	8.18e-07
TIMM22	0.525128	4.45497	28.4297	9.72e-08	8.23e-07
DAZAP1	-0.43603	5.88416	28.3735	1e-07	8.47e-07
PDPK1	0.393849	6.03366	28.3722	1e-07	8.47e-07
TJP2	-0.547189	4.41284	28.3721	1e-07	8.47e-07
ARHGAP42	-1.00616	2.37291	28.3655	1e-07	8.49e-07
STK24	-0.399114	6.87184	28.3508	1.01e-07	8.55e-07
QKI	-0.495311	7.7136	28.3435	1.02e-07	8.58e-07
RFC4	-0.703169	4.02342	28.3116	1.03e-07	8.71e-07
PTPN13	-0.425633	7.63302	28.3073	1.04e-07	8.73e-07
BCL2	-1.42681	1.13811	28.3016	1.04e-07	8.75e-07
SENP7	-0.67911	4.03007	28.2917	1.04e-07	8.79e-07
KRTAP3-1	3.38056	2.63758	28.2567	1.06e-07	8.94e-07
PHF19	-0.652419	4.57067	28.2336	1.08e-07	9.04e-07
TLE4	0.38243	6.82484	28.2287	1.08e-07	9.06e-07
LNPEP	0.500595	4.6123	28.2263	1.08e-07	9.06e-07
PTPRD	-0.701756	3.98761	28.2241	1.08e-07	9.07e-07
CEBPG	-0.471865	5.30506	28.1824	1.1e-07	9.26e-07
HTR7P1	0.670137	3.7026	28.1661	1.11e-07	9.33e-07
XPC	-0.363404	6.60641	28.1646	1.11e-07	9.33e-07
FRMD4A	-0.380976	6.80566	28.1641	1.11e-07	9.33e-07
CAMK4	-1.41693	1.74391	28.1597	1.12e-07	9.35e-07
FAM18B1	0.522173	5.55627	28.1338	1.13e-07	9.47e-07
C21orf58	-0.964547	2.29461	28.0953	1.15e-07	9.65e-07
ATP7B	0.84784	2.85375	28.0846	1.16e-07	9.7e-07
OAS2	-1.30779	4.87872	28.0635	1.17e-07	9.8e-07
FLJ10038	-0.763524	3.26634	28.0525	1.18e-07	9.85e-07
ICAM1	0.399555	8.15757	28.0505	1.18e-07	9.85e-07
AHSA2	-0.388919	6.39148	28.0317	1.19e-07	9.94e-07
IFI27	-1.24115	2.58514	28.0101	1.21e-07	1e-06
TRANK1	-0.480078	5.54462	27.9989	1.21e-07	1.01e-06
PNRC1	-0.566176	6.17924	27.9736	1.23e-07	1.02e-06
SELT	0.455419	7.33381	27.9533	1.24e-07	1.03e-06
CLCN3	0.379773	6.42344	27.9527	1.24e-07	1.03e-06
SIL1	0.558485	6.01335	27.93	1.26e-07	1.04e-06
MX2	-1.12132	4.32295	27.9012	1.28e-07	1.06e-06
TRIB2	-0.495134	4.9015	27.8457	1.31e-07	1.09e-06
DCTN1	0.505877	7.60437	27.8451	1.31e-07	1.09e-06
SKP1	0.436791	8.62187	27.8436	1.32e-07	1.09e-06
LINC00161	-2.22794	-0.579499	27.8436	1.32e-07	1.09e-06
FAM174B	-1.34167	2.0725	27.843	1.32e-07	1.09e-06
TMEM17	0.964736	2.18744	27.8095	1.34e-07	1.11e-06
RER1	0.370842	7.24589	27.7601	1.37e-07	1.13e-06
MCL1	-0.361042	8.32563	27.7462	1.38e-07	1.14e-06
PID1	-0.669872	3.11158	27.7384	1.39e-07	1.15e-06
HIGD1A	0.448902	7.61969	27.7291	1.4e-07	1.15e-06
PLEKHG4B	-0.658168	3.15298	27.7268	1.4e-07	1.15e-06
TCEAL1	0.53771	4.97857	27.7219	1.4e-07	1.15e-06
NMI	-0.890998	3.9715	27.7135	1.41e-07	1.16e-06
ZFP36	-0.638891	4.0256	27.7042	1.41e-07	1.16e-06
SOCS2	-0.550849	4.67231	27.6487	1.45e-07	1.19e-06
NAPB	0.512617	4.42906	27.6451	1.46e-07	1.2e-06
LOC100499467	-1.00295	1.75247	27.6368	1.46e-07	1.2e-06
CCDC69	0.799668	3.98793	27.5981	1.49e-07	1.22e-06
BCL2L11	-1.26558	2.3573	27.5807	1.51e-07	1.23e-06
LRRC15	0.555686	5.58821	27.5798	1.51e-07	1.23e-06
MIR17HG	-1.33907	1.35441	27.5769	1.51e-07	1.24e-06
ISCU	0.395924	7.0175	27.5749	1.51e-07	1.24e-06
ILF3	-0.390947	7.58766	27.5587	1.52e-07	1.25e-06
ANO10	0.398665	6.61981	27.5553	1.53e-07	1.25e-06
TRO	-0.506152	5.32526	27.5461	1.53e-07	1.25e-06
ALKBH6	0.820413	3.25199	27.5413	1.54e-07	1.25e-06
PAN2	-0.535609	4.82974	27.5344	1.54e-07	1.26e-06
HLA-H	-0.529349	5.68516	27.5313	1.55e-07	1.26e-06
CALU	0.378397	10.981	27.5276	1.55e-07	1.26e-06
METTL8	0.49392	4.72989	27.4808	1.59e-07	1.29e-06
IGDCC4	-0.404758	6.04222	27.4637	1.6e-07	1.3e-06
ZCCHC3	-0.48937	4.80846	27.4636	1.6e-07	1.3e-06
C15orf54	2.44461	-0.252092	27.4621	1.6e-07	1.3e-06
WFS1	0.621676	6.08865	27.458	1.61e-07	1.3e-06
RUNX1T1	-0.569292	4.71383	27.4484	1.61e-07	1.31e-06
FAM117B	-0.773982	2.50439	27.4306	1.63e-07	1.32e-06
RPS6KA2	-0.42273	5.86652	27.401	1.65e-07	1.34e-06
FEZ2	0.492851	6.65013	27.3889	1.66e-07	1.35e-06
USP13	-0.517712	4.90481	27.376	1.67e-07	1.36e-06
ZNF496	-0.687815	3.46177	27.3679	1.68e-07	1.36e-06
TACC2	-0.504074	4.94063	27.3218	1.72e-07	1.39e-06
SUV39H2	-0.677056	3.43123	27.2933	1.75e-07	1.41e-06
PTS	0.556228	5.0202	27.2421	1.8e-07	1.45e-06
NPTX1	-0.881369	3.24733	27.2325	1.8e-07	1.46e-06
RNF181	0.554055	5.32339	27.2065	1.83e-07	1.47e-06
NGF	1.26792	1.03102	27.1656	1.87e-07	1.5e-06
SPTLC3	-1.13125	1.36891	27.1418	1.89e-07	1.52e-06
TRAK2	0.39093	7.22175	27.1408	1.89e-07	1.52e-06
ZDHHC5	0.365684	7.11495	27.0985	1.93e-07	1.56e-06
ZNF468	0.610893	3.90322	27.0861	1.95e-07	1.56e-06
EYA1	-1.59216	1.04451	27.0624	1.97e-07	1.58e-06
NAAA	0.646538	3.50027	27.0524	1.98e-07	1.59e-06
NCOA7	-0.408426	6.93473	27.0433	1.99e-07	1.6e-06
NEFL	-1.36988	2.02802	27.0112	2.02e-07	1.62e-06
FBLN5	-0.367119	7.48322	26.9593	2.08e-07	1.67e-06
ZNF543	-1.01633	1.5902	26.9426	2.1e-07	1.68e-06
FLJ43663	0.735334	3.63189	26.9384	2.1e-07	1.68e-06
CRYAB	0.542252	4.59122	26.9112	2.13e-07	1.7e-06
LSM6	-0.786288	3.61866	26.9088	2.13e-07	1.7e-06
PROSER1	-0.45668	5.14194	26.9023	2.14e-07	1.71e-06
FGFRL1	0.728681	4.52464	26.8828	2.16e-07	1.73e-06
TRIM47	-0.761557	3.14941	26.8472	2.2e-07	1.76e-06
PTPN1	0.387092	6.27814	26.8366	2.21e-07	1.77e-06
ABL2	0.456004	5.86846	26.8241	2.23e-07	1.78e-06
STARD7	0.376982	7.33703	26.8163	2.24e-07	1.78e-06
B4GALT5	-0.362906	6.65916	26.8133	2.24e-07	1.78e-06
NPDC1	0.806548	5.33718	26.801	2.26e-07	1.79e-06
MSMO1	0.533133	6.66102	26.7986	2.26e-07	1.79e-06
RAB32	0.371975	6.23761	26.7982	2.26e-07	1.79e-06
ACTN1	0.394796	9.73451	26.7668	2.3e-07	1.82e-06
ADAMTS6	-0.610257	4.42802	26.7349	2.33e-07	1.85e-06
TUSC2	0.522665	4.60713	26.7191	2.35e-07	1.87e-06
HMG20A	-0.450832	5.53929	26.7172	2.36e-07	1.87e-06
SLC25A37	-0.480413	5.20738	26.7075	2.37e-07	1.88e-06
RBMS3	-0.568861	4.25821	26.6902	2.39e-07	1.89e-06
CYGB	-0.764688	3.5915	26.6795	2.4e-07	1.9e-06
KCNE4	0.550285	4.40573	26.6538	2.43e-07	1.92e-06
PSMC4	0.427503	6.31153	26.6142	2.48e-07	1.96e-06
RAD21	-0.42564	7.654	26.5979	2.51e-07	1.98e-06
MYO1E	0.427661	6.09801	26.5905	2.51e-07	1.98e-06
IL4R	-0.57741	5.34945	26.5639	2.55e-07	2.01e-06
RASAL2	0.422519	5.59111	26.5456	2.57e-07	2.03e-06
SETD3	0.384067	5.95312	26.5233	2.6e-07	2.05e-06
MFN2	0.418259	6.72849	26.4925	2.65e-07	2.08e-06
LMNB2	-0.492919	6.36999	26.4744	2.67e-07	2.1e-06
TM2D1	0.456409	5.3928	26.4678	2.68e-07	2.11e-06
STEAP3	-0.45786	5.38237	26.4659	2.68e-07	2.11e-06
TMEM48	-0.53822	5.15455	26.4563	2.7e-07	2.12e-06
RSBN1L	-0.699406	3.92154	26.4543	2.7e-07	2.12e-06
GALNT5	0.371262	7.2935	26.4389	2.72e-07	2.13e-06
TBCB	0.507743	5.28209	26.4363	2.72e-07	2.14e-06
CSGALNACT1	-0.511791	6.0504	26.4157	2.75e-07	2.16e-06
FOLR3	2.25493	0.193257	26.3849	2.8e-07	2.19e-06
CNTLN	-0.649919	4.64445	26.3804	2.8e-07	2.19e-06
TMEM231	0.558884	3.79272	26.3758	2.81e-07	2.2e-06
METTL18	-0.861654	2.69417	26.362	2.83e-07	2.21e-06
TYMP	-0.952495	3.27703	26.3615	2.83e-07	2.21e-06
SALL2	-0.594754	3.68082	26.3582	2.84e-07	2.21e-06
DUSP1	0.480088	5.67213	26.3471	2.85e-07	2.23e-06
SPTAN1	0.397451	8.02508	26.3339	2.87e-07	2.24e-06
CH25H	-1.79426	0.98917	26.3096	2.91e-07	2.27e-06
SPON1	-0.898745	2.01002	26.2853	2.95e-07	2.29e-06
ZCCHC14	-0.540388	4.96072	26.2485	3e-07	2.34e-06
TRIM6	-0.737545	2.98886	26.2464	3.01e-07	2.34e-06
APOLD1	-0.54602	4.33253	26.2422	3.01e-07	2.34e-06
LRP6	0.426763	5.98016	26.2146	3.05e-07	2.37e-06
CENPH	-1.05651	3.00579	26.1804	3.11e-07	2.42e-06
ERGIC1	0.396969	7.90658	26.1739	3.12e-07	2.42e-06
ZMIZ1	-0.382469	6.61798	26.1621	3.14e-07	2.44e-06
PCMTD2	-0.496562	5.81022	26.1514	3.16e-07	2.45e-06
HFE	0.542123	4.26151	26.144	3.17e-07	2.46e-06
NPTXR	0.805707	3.54373	26.113	3.22e-07	2.49e-06
RIOK3	0.415652	6.60524	26.0895	3.26e-07	2.52e-06
ADAM12	-0.47873	7.56284	26.0218	3.38e-07	2.61e-06
H1FX	-0.586641	4.85811	25.9989	3.42e-07	2.64e-06
BTRC	0.406122	5.74876	25.9967	3.42e-07	2.64e-06
PSME1	-0.376258	7.05401	25.9721	3.46e-07	2.67e-06
2002-03-01	0.629393	3.46699	25.9713	3.47e-07	2.67e-06
GALNT11	0.470292	5.47278	25.9505	3.5e-07	2.7e-06
NEK10	1.39857	0.909814	25.9373	3.53e-07	2.72e-06
CTSC	-0.428522	8.67573	25.9218	3.56e-07	2.74e-06
HAUS8	-0.943959	2.13305	25.9188	3.56e-07	2.74e-06
APOBEC3G	-0.756562	2.43518	25.9064	3.58e-07	2.76e-06
AK4	0.68111	3.74393	25.9048	3.59e-07	2.76e-06
ADAMTS19	1.02858	4.90929	25.8808	3.63e-07	2.79e-06
PROS1	-0.746451	3.09855	25.8684	3.66e-07	2.81e-06
ZNF507	-0.530446	4.87146	25.8644	3.66e-07	2.81e-06
PHF2	-0.44298	5.24682	25.8611	3.67e-07	2.81e-06
TM2D2	0.400672	5.83119	25.8324	3.72e-07	2.85e-06
LOC100507463	-1.63696	0.879312	25.826	3.74e-07	2.86e-06
CRIP1	-1.06004	2.31276	25.8256	3.74e-07	2.86e-06
MYH10	-0.337231	7.49554	25.7999	3.79e-07	2.9e-06
FBXL7	-0.413456	5.5945	25.7998	3.79e-07	2.9e-06
PRUNE2	0.717749	3.39874	25.7991	3.79e-07	2.9e-06
PDIA4	-0.333925	8.20624	25.7973	3.79e-07	2.9e-06
TXNDC17	0.522137	5.56991	25.7936	3.8e-07	2.9e-06
DHRS7	0.424074	6.26236	25.7825	3.82e-07	2.91e-06
SMA4	-1.01481	1.47515	25.7822	3.82e-07	2.91e-06
ZNF259	0.455448	5.18919	25.7758	3.83e-07	2.92e-06
FANCG	-0.767904	3.26665	25.7652	3.86e-07	2.94e-06
CARD10	-0.98121	2.45278	25.7308	3.93e-07	2.99e-06
GHR	1.0024	1.83516	25.6923	4e-07	3.05e-06
MYO15B	-1.20637	2.1404	25.6637	4.06e-07	3.09e-06
MAPK11	0.633816	4.48165	25.6594	4.07e-07	3.1e-06
ACLY	0.376759	7.96732	25.6494	4.09e-07	3.11e-06
SNAI2	-0.462419	6.2526	25.631	4.13e-07	3.14e-06
ITGA3	0.500811	7.45618	25.5963	4.21e-07	3.19e-06
PKIG	-0.395679	6.63292	25.5737	4.26e-07	3.23e-06
PDE11A	2.05902	-0.209186	25.5568	4.3e-07	3.26e-06
PTK2B	-0.574436	4.4567	25.5464	4.32e-07	3.27e-06
BOC	-0.754696	4.0535	25.5459	4.32e-07	3.27e-06
SYNE2	-1.07715	2.39169	25.5254	4.37e-07	3.3e-06
RPL12	-0.336454	9.42467	25.5225	4.37e-07	3.31e-06
RPN2	0.33291	9.14054	25.5135	4.39e-07	3.32e-06
WIPI2	0.430346	6.34778	25.5109	4.4e-07	3.32e-06
PTPRE	-1.6899	0.573642	25.5102	4.4e-07	3.32e-06
MITF	0.485994	5.02294	25.4792	4.47e-07	3.37e-06
TCTEX1D1	-2.07836	-0.172112	25.4694	4.49e-07	3.39e-06
LNP1	-0.829428	2.15525	25.4652	4.5e-07	3.39e-06
SORCS2	-1.08225	2.3927	25.455	4.53e-07	3.41e-06
FN1	0.379078	14.4227	25.4364	4.57e-07	3.44e-06
RRM2B	0.484346	7.06838	25.4353	4.57e-07	3.44e-06
STAG2	-0.434462	6.84907	25.4245	4.6e-07	3.46e-06
BTN2A1	0.402728	5.61163	25.3977	4.66e-07	3.5e-06
CERS2	0.33715	7.38504	25.3895	4.68e-07	3.52e-06
FAM100B	-0.586353	4.29079	25.3889	4.69e-07	3.52e-06
PLAC9	-1.26699	1.59737	25.3727	4.73e-07	3.54e-06
PHLDA2	0.579607	4.69904	25.3571	4.76e-07	3.57e-06
CARHSP1	-0.490829	5.34273	25.3503	4.78e-07	3.58e-06
RAP2B	-0.467213	4.95832	25.3438	4.8e-07	3.59e-06
TMEM173	-0.484083	6.34771	25.3271	4.84e-07	3.62e-06
WBP2	0.432227	6.06956	25.3254	4.84e-07	3.62e-06
AKIP1	0.521356	4.58119	25.3238	4.85e-07	3.62e-06
DHRS1	0.628195	4.03157	25.3129	4.87e-07	3.64e-06
VEPH1	-0.56127	4.63467	25.3118	4.88e-07	3.64e-06
LOC646324	1.6414	0.541209	25.3089	4.88e-07	3.64e-06
LOC643650	1.27238	0.796106	25.3085	4.89e-07	3.64e-06
CLDN23	-1.00832	1.85177	25.3075	4.89e-07	3.64e-06
POU2F2	0.374928	6.98342	25.2994	4.91e-07	3.66e-06
TXN	0.341263	8.13929	25.2871	4.94e-07	3.68e-06
PRDM8	-0.595406	3.4582	25.2843	4.95e-07	3.68e-06
SIN3A	-0.389487	5.78244	25.2804	4.96e-07	3.69e-06
ANKRD10	-0.462226	5.11873	25.2767	4.97e-07	3.69e-06
GPER	0.769809	2.64328	25.2613	5.01e-07	3.72e-06
C2orf74	-0.877713	2.51189	25.2579	5.02e-07	3.72e-06
HAUS4	-0.546257	3.85048	25.2509	5.03e-07	3.73e-06
SET	-0.417343	8.27826	25.2426	5.06e-07	3.75e-06
EIF2A	-0.425421	6.65417	25.2278	5.09e-07	3.77e-06
STAT2	-0.434539	7.86962	25.2048	5.16e-07	3.82e-06
C12orf75	0.338421	8.97962	25.1993	5.17e-07	3.83e-06
NDUFS5	0.366292	6.7617	25.1531	5.3e-07	3.92e-06
MYOF	0.326418	9.64116	25.1284	5.36e-07	3.97e-06
ARID2	-0.497593	4.7911	25.1086	5.42e-07	4e-06
NOLC1	-0.365002	6.28713	25.0909	5.47e-07	4.04e-06
TIFA	-0.740662	3.61848	25.0872	5.48e-07	4.04e-06
USP53	0.411999	9.54013	25.0835	5.49e-07	4.05e-06
IL12A	1.11642	1.78972	25.0744	5.52e-07	4.07e-06
FBXL2	0.512721	4.34117	25.0677	5.54e-07	4.08e-06
JHDM1D	-0.745994	3.15027	25.0489	5.59e-07	4.12e-06
FBXO2	1.0249	2.27818	25.043	5.61e-07	4.13e-06
C4orf21	-0.875137	2.7225	24.9908	5.76e-07	4.24e-06
KIF3B	0.341311	6.56486	24.988	5.77e-07	4.24e-06
AK3	0.387435	7.35453	24.9835	5.78e-07	4.25e-06
PBLD	0.702124	3.40348	24.9372	5.92e-07	4.35e-06
GPR107	0.327578	7.57845	24.8772	6.11e-07	4.48e-06
SAP18	0.35395	7.18965	24.8712	6.13e-07	4.5e-06
BZRAP1	-0.802118	3.37387	24.8677	6.14e-07	4.5e-06
NOMO2	0.669343	4.17447	24.8547	6.18e-07	4.53e-06
NBEAL1	0.704526	4.51631	24.8484	6.2e-07	4.54e-06
POFUT2	0.437377	6.74601	24.8403	6.23e-07	4.56e-06
KIAA1147	-0.58239	4.46958	24.8131	6.32e-07	4.62e-06
DMKN	-0.999331	1.992	24.8129	6.32e-07	4.62e-06
MTBP	-0.911363	2.60548	24.8079	6.33e-07	4.63e-06
SNHG9	1.22606	1.28696	24.8023	6.35e-07	4.64e-06
PCDHGB7	-0.540094	4.08948	24.7709	6.46e-07	4.71e-06
PIKFYVE	-0.375995	6.17223	24.7512	6.52e-07	4.76e-06
TET1	-1.05363	2.37788	24.74	6.56e-07	4.78e-06
RRAS2	0.41455	6.8778	24.7255	6.61e-07	4.82e-06
CBX3	-0.474314	7.96799	24.7248	6.61e-07	4.82e-06
DNA2	-0.735586	3.02712	24.7075	6.67e-07	4.86e-06
ARHGAP22	0.552722	4.35346	24.7069	6.67e-07	4.86e-06
HNRNPH3	-0.359966	7.21463	24.7045	6.68e-07	4.86e-06
CHRAC1	-0.476316	5.00806	24.697	6.71e-07	4.87e-06
TLCD2	0.568068	3.951	24.6816	6.76e-07	4.91e-06
ARID5A	-0.670822	4.18065	24.6302	6.95e-07	5.04e-06
ADAM15	0.713855	6.00094	24.6221	6.97e-07	5.06e-06
ATP5L	0.341528	6.90346	24.6218	6.98e-07	5.06e-06
LPAR1	-0.344447	9.01332	24.6058	7.03e-07	5.1e-06
CSTB	0.376439	6.83108	24.5901	7.09e-07	5.14e-06
TMEM129	0.58821	5.14144	24.5813	7.12e-07	5.16e-06
GALNT14	-0.837797	2.07173	24.5691	7.17e-07	5.19e-06
DRAP1	0.439435	6.77274	24.5556	7.22e-07	5.22e-06
EME1	-1.27687	1.53429	24.5537	7.23e-07	5.22e-06
DNASE1L1	0.65245	5.07732	24.5461	7.26e-07	5.24e-06
GCH1	-1.04925	1.67281	24.5438	7.26e-07	5.24e-06
ALPL	-0.725222	4.23993	24.542	7.27e-07	5.25e-06
CCDC113	0.729157	2.79677	24.5347	7.3e-07	5.26e-06
CDK14	-0.486385	4.91712	24.5179	7.36e-07	5.31e-06
CAP1	0.312196	9.29012	24.512	7.38e-07	5.32e-06
FAM55C	0.386752	6.15363	24.4891	7.47e-07	5.38e-06
POLE2	-1.14162	1.99401	24.4787	7.51e-07	5.41e-06
UGDH	-0.428765	6.50613	24.4704	7.55e-07	5.43e-06
CBX2	-1.90214	0.622656	24.4441	7.65e-07	5.5e-06
CCND2	1.04355	1.54633	24.4216	7.74e-07	5.56e-06
BNC1	-0.54428	4.34127	24.4156	7.76e-07	5.57e-06
EGR3	-1.78236	0.955857	24.3786	7.91e-07	5.68e-06
FABP4	1.31956	0.789916	24.3692	7.95e-07	5.7e-06
FAM46A	-0.44289	5.65684	24.3655	7.97e-07	5.71e-06
ProSAPiP1	0.670973	2.89721	24.3458	8.05e-07	5.77e-06
NT5C2	0.357394	7.10969	24.308	8.21e-07	5.88e-06
C1orf122	0.535759	4.84134	24.3042	8.23e-07	5.89e-06
WDR19	-0.446604	5.26095	24.2782	8.34e-07	5.96e-06
UBFD1	0.328115	7.42248	24.2778	8.34e-07	5.96e-06
POFUT1	0.333385	6.8436	24.2487	8.47e-07	6.05e-06
HAUS1	-0.611276	4.4332	24.2335	8.53e-07	6.09e-06
CYP7B1	0.390926	6.44145	24.2198	8.59e-07	6.13e-06
LOC643401	1.42092	0.440196	24.2163	8.61e-07	6.14e-06
UQCR10	0.387485	5.74229	24.1826	8.76e-07	6.24e-06
NDST1	0.409932	7.70717	24.1822	8.76e-07	6.24e-06
TMEM41A	0.435153	4.73903	24.177	8.79e-07	6.26e-06
ITGB1	0.354596	12.2583	24.1569	8.88e-07	6.32e-06
SHC1	0.39468	8.9228	24.1102	9.1e-07	6.47e-06
SAV1	-0.389893	6.04497	24.11	9.1e-07	6.47e-06
GDPD1	0.904828	2.34589	24.1004	9.14e-07	6.5e-06
SGCD	0.400762	6.78967	24.0752	9.26e-07	6.58e-06
PHB2	-0.350374	6.99128	24.0628	9.32e-07	6.62e-06
SDF4	0.512818	7.49643	24.0531	9.37e-07	6.65e-06
IGIP	0.616668	3.76337	24.0383	9.44e-07	6.69e-06
PER3	-0.642577	3.13797	24.0381	9.44e-07	6.69e-06
SRSF1	-0.337789	7.84979	24.0118	9.57e-07	6.78e-06
DCTN5	0.339734	6.79657	23.9944	9.66e-07	6.84e-06
ITGA6	0.39454	5.60653	23.9926	9.67e-07	6.84e-06
IFT81	-0.564263	5.34223	23.9749	9.76e-07	6.9e-06
LEPR	0.476636	5.88042	23.9586	9.84e-07	6.96e-06
FILIP1L	0.417269	7.58543	23.9552	9.86e-07	6.96e-06
GULP1	-0.478607	5.44056	23.9536	9.87e-07	6.97e-06
WDR35	-0.569376	4.15412	23.9395	9.94e-07	7.01e-06
FANCA	-1.00808	2.88932	23.9188	1e-06	7.09e-06
TIAM2	-0.843956	2.76722	23.8981	1.02e-06	7.16e-06
FKBP4	0.392182	5.55147	23.8934	1.02e-06	7.17e-06
SLC35B2	0.483999	6.42764	23.8906	1.02e-06	7.18e-06
RPL39L	-0.72635	3.12118	23.8834	1.02e-06	7.2e-06
MAPK9	0.383282	5.92008	23.8815	1.02e-06	7.2e-06
UBE2D1	-0.534357	4.87605	23.8636	1.03e-06	7.27e-06
HIST1H3D	1.89696	-0.0561128	23.8566	1.04e-06	7.29e-06
STS	0.4441	5.19252	23.8355	1.05e-06	7.37e-06
NCSTN	0.332764	7.77571	23.834	1.05e-06	7.37e-06
CHTF18	-1.00898	2.19953	23.8312	1.05e-06	7.38e-06
SATB1	-0.563628	4.22309	23.8277	1.05e-06	7.38e-06
TPD52L2	0.328123	7.72812	23.7956	1.07e-06	7.51e-06
C20orf194	0.359954	5.9279	23.7851	1.08e-06	7.54e-06
TPT1-AS1	-0.803231	2.33756	23.7803	1.08e-06	7.56e-06
MPP7	0.897983	2.43635	23.762	1.09e-06	7.63e-06
WNK1	0.384381	7.65219	23.7308	1.11e-06	7.75e-06
KIAA1462	0.375879	7.81349	23.7022	1.12e-06	7.86e-06
RNF10	0.329292	7.2567	23.6949	1.13e-06	7.88e-06
PAQR8	-0.568219	3.90839	23.6899	1.13e-06	7.9e-06
SELENBP1	-0.678196	4.61586	23.6705	1.14e-06	7.98e-06
PCMT1	0.363998	6.55308	23.6631	1.15e-06	8e-06
LTBP1	-0.307176	9.11919	23.6629	1.15e-06	8e-06
PPP2R5B	0.543242	4.83658	23.6583	1.15e-06	8.01e-06
ST3GAL1	-0.353889	6.57201	23.6443	1.16e-06	8.07e-06
NPLOC4	0.41353	6.67682	23.6142	1.18e-06	8.19e-06
BRK1	0.328157	7.81239	23.5884	1.19e-06	8.3e-06
CNPPD1	0.564949	5.18779	23.5874	1.19e-06	8.3e-06
TOPBP1	-0.43957	5.55964	23.5843	1.2e-06	8.3e-06
ABCB9	0.863593	2.32209	23.5815	1.2e-06	8.31e-06
C15orf59	1.26201	1.31929	23.5755	1.2e-06	8.33e-06
TRIM55	0.424626	5.98123	23.5678	1.21e-06	8.36e-06
NDE1	-0.57709	4.14252	23.5633	1.21e-06	8.38e-06
WRB	0.418983	5.48522	23.5624	1.21e-06	8.38e-06
TNXB	-1.22273	2.45636	23.5488	1.22e-06	8.43e-06
G2E3	-0.549392	5.11661	23.5089	1.24e-06	8.61e-06
ANKRD33B	-0.658844	3.35587	23.5024	1.25e-06	8.63e-06
LRPAP1	0.454343	7.26594	23.4744	1.27e-06	8.75e-06
CTTN	0.374773	8.33648	23.4663	1.27e-06	8.78e-06
SFMBT2	-0.563029	4.07689	23.4622	1.27e-06	8.8e-06
RAB27A	-0.481179	4.98558	23.4617	1.27e-06	8.8e-06
SFSWAP	-0.434672	5.05013	23.4535	1.28e-06	8.83e-06
DLD	0.402216	6.84551	23.4304	1.3e-06	8.93e-06
HERC3	0.460392	5.39874	23.425	1.3e-06	8.95e-06
TET3	-0.575618	3.82633	23.4169	1.3e-06	8.98e-06
MTRNR2L8	0.564165	8.64143	23.39	1.32e-06	9.11e-06
SHMT2	-0.389383	6.81723	23.353	1.35e-06	9.28e-06
OTUD1	-0.594112	3.15889	23.3415	1.36e-06	9.33e-06
IDI1	0.503149	6.07906	23.3126	1.38e-06	9.46e-06
DUSP3	0.356853	6.44653	23.3002	1.39e-06	9.52e-06
SLCO2A1	-0.848367	1.96986	23.2902	1.39e-06	9.57e-06
AIFM1	0.422608	5.17701	23.2597	1.42e-06	9.71e-06
DUSP14	0.441428	5.81024	23.2417	1.43e-06	9.8e-06
PRPF38A	-0.542369	4.95416	23.2415	1.43e-06	9.8e-06
FGF1	0.482871	4.61965	23.2282	1.44e-06	9.86e-06
EIF4B	-0.351546	9.28073	23.2267	1.44e-06	9.86e-06
2004-03-01	0.504909	5.07595	23.2259	1.44e-06	9.86e-06
SNHG1	-0.424645	5.50539	23.2068	1.45e-06	9.95e-06
ZC2HC1A	-0.640127	3.9651	23.1208	1.52e-06	1.04e-05
AMIGO1	0.901514	2.40741	23.1083	1.53e-06	1.05e-05
CENPM	-1.2711	1.43869	23.0917	1.54e-06	1.05e-05
RGS10	-0.582786	5.27685	23.0808	1.55e-06	1.06e-05
ANK1	0.548694	5.14337	23.079	1.55e-06	1.06e-05
COQ6	0.554101	3.89582	23.0741	1.56e-06	1.06e-05
SAA2	1.42832	0.626828	23.0738	1.56e-06	1.06e-05
MBNL3	-0.700208	2.8071	23.0563	1.57e-06	1.07e-05
LOC647979	0.361438	9.35541	23.056	1.57e-06	1.07e-05
NINL	-0.548963	3.92605	23.053	1.58e-06	1.07e-05
MYBL1	0.472913	6.01798	23.0433	1.58e-06	1.08e-05
TSSK3	-1.03343	1.53367	23.0412	1.59e-06	1.08e-05
ARHGEF4	0.745102	3.18394	23.0045	1.62e-06	1.1e-05
AMT	-0.653753	3.42326	23.003	1.62e-06	1.1e-05
NCAM1	-0.825535	2.24595	22.9963	1.62e-06	1.1e-05
ORMDL3	0.417915	6.12208	22.9876	1.63e-06	1.11e-05
ZDHHC18	0.498027	5.18271	22.9798	1.64e-06	1.11e-05
RAB27B	0.450623	5.62463	22.9765	1.64e-06	1.11e-05
PPP1CC	-0.386079	7.47424	22.9572	1.66e-06	1.12e-05
UQCC	0.406188	5.45519	22.9232	1.69e-06	1.14e-05
BMP2K	-0.4844	5.06419	22.9205	1.69e-06	1.14e-05
RNASEH2A	-0.692289	3.18402	22.9142	1.69e-06	1.15e-05
CEP68	-0.472274	4.44431	22.9064	1.7e-06	1.15e-05
CYB5D1	0.460838	4.70299	22.8998	1.71e-06	1.15e-05
PIM2	0.604359	3.2572	22.8965	1.71e-06	1.15e-05
GHITM	0.357273	7.58743	22.8912	1.71e-06	1.16e-05
NUCKS1	-0.403834	8.6223	22.8704	1.73e-06	1.17e-05
INPPL1	0.510023	7.47865	22.8695	1.73e-06	1.17e-05
ITPR3	-0.449749	5.67459	22.8684	1.73e-06	1.17e-05
FBXL3	-0.400942	5.94088	22.8677	1.74e-06	1.17e-05
CEBPD	-0.542582	5.95605	22.8647	1.74e-06	1.17e-05
TRADD	0.710639	3.61573	22.8555	1.75e-06	1.18e-05
SPATA6	-0.642867	3.45833	22.8495	1.75e-06	1.18e-05
HTATSF1	0.332454	6.46922	22.8025	1.8e-06	1.21e-05
C6orf203	0.568542	4.13372	22.7908	1.81e-06	1.21e-05
UBE2H	0.342252	8.29554	22.7237	1.87e-06	1.26e-05
HMCN1	0.887537	4.10458	22.7112	1.88e-06	1.26e-05
PRPS2	-0.516257	4.60465	22.6981	1.9e-06	1.27e-05
FMN2	0.495973	5.59557	22.686	1.91e-06	1.28e-05
MPV17L2	0.697328	3.00009	22.6811	1.91e-06	1.28e-05
TMEM30A	0.351213	9.08727	22.672	1.92e-06	1.29e-05
HEYL	-1.51534	1.21427	22.6683	1.93e-06	1.29e-05
UHMK1	0.390051	7.34813	22.6571	1.94e-06	1.3e-05
RNF141	0.44836	6.0885	22.6399	1.95e-06	1.31e-05
SMC6	-0.494793	5.74265	22.6198	1.97e-06	1.32e-05
HCG11	0.451714	4.94486	22.6075	1.99e-06	1.33e-05
UNC13B	0.393779	5.36088	22.6061	1.99e-06	1.33e-05
DUSP7	-0.402396	5.41779	22.5745	2.02e-06	1.35e-05
MITD1	-0.697229	4.41494	22.5533	2.04e-06	1.36e-05
MMP15	0.844795	2.1724	22.5491	2.05e-06	1.37e-05
C3orf70	0.924056	1.8211	22.5403	2.06e-06	1.37e-05
EBF4	-0.955683	2.69238	22.5199	2.08e-06	1.39e-05
LEPROT	0.351705	8.00088	22.4978	2.1e-06	1.4e-05
DPF3	-0.732843	3.02546	22.4587	2.15e-06	1.43e-05
GPAM	-0.507597	4.5047	22.4493	2.16e-06	1.43e-05
TMEM229B	1.22087	0.798918	22.4373	2.17e-06	1.44e-05
SUCLG2	-0.42126	6.19439	22.4319	2.18e-06	1.45e-05
SBNO2	-0.595998	5.51901	22.4303	2.18e-06	1.45e-05
TMCO1	0.360782	7.00746	22.4276	2.18e-06	1.45e-05
CAV2	0.360732	7.64463	22.4169	2.19e-06	1.46e-05
ATF4	-0.322146	8.47175	22.4054	2.21e-06	1.46e-05
MTMR11	-0.570458	4.22148	22.393	2.22e-06	1.47e-05
POT1	-0.618445	4.16049	22.3929	2.22e-06	1.47e-05
MCOLN1	0.665504	3.84216	22.3915	2.22e-06	1.47e-05
CLIP1	0.345452	7.37458	22.3636	2.26e-06	1.49e-05
MASTL	-0.464643	4.69073	22.3623	2.26e-06	1.49e-05
CACHD1	-0.521359	4.23912	22.3433	2.28e-06	1.51e-05
LOC728730	0.723013	3.57386	22.3288	2.3e-06	1.52e-05
FOXN2	-0.641047	4.25877	22.3212	2.31e-06	1.52e-05
ACAA1	0.529477	5.02321	22.2706	2.37e-06	1.56e-05
KIAA1715	0.447113	5.98654	22.2642	2.38e-06	1.57e-05
RAPH1	0.40141	5.67469	22.2622	2.38e-06	1.57e-05
KIAA1009	-0.770214	3.17386	22.2612	2.38e-06	1.57e-05
DCLRE1B	-0.771855	2.82354	22.2545	2.39e-06	1.57e-05
ICMT	0.342858	7.27185	22.2303	2.42e-06	1.59e-05
PIN1	0.550157	4.80159	22.2274	2.42e-06	1.59e-05
C6orf141	-1.77849	0.186582	22.2196	2.43e-06	1.6e-05
MT2A	-0.45095	8.6611	22.2126	2.44e-06	1.6e-05
SOWAHC	0.420652	5.57504	22.1842	2.48e-06	1.63e-05
TMEM131	0.37612	7.0383	22.1745	2.49e-06	1.63e-05
BRF2	0.608829	3.67414	22.1666	2.5e-06	1.64e-05
MSI2	0.424623	4.73172	22.1539	2.52e-06	1.65e-05
KHDRBS3	-0.605865	3.76461	22.1423	2.53e-06	1.66e-05
KIAA1797	0.354479	5.93404	22.1388	2.54e-06	1.66e-05
ACO2	0.460588	5.54585	22.1175	2.56e-06	1.68e-05
[truncated: 11,095 more rows]
