# Supplementary material for: Induction of fibroblast senescence generates a non-fibrogenic myofibroblast phenotype that differentially impacts on cancer prognosis
Source: Aging (Albany NY). 2016 Dec 15;9(1):114–31. doi: 10.18632/aging.101127 (PMC5310659; doi:10.18632/aging.101127)
Supplement: Supplementary file 3 [file aging-09-0114-s003.xlsx]

## Sheet: Molecular function
rank	Id	Biological process terma	BonferoniP	overlap	nTerms
1	GO:0005201	extracellular matrix structural constituent	1.345e-23	28	70
2	GO:0005518	collagen binding	1.381e-22	27	68
3	GO:0005178	integrin binding	1.627e-13	24	105
4	GO:0005509	calcium ion binding	1.864e-12	58	694
5	GO:0032403	protein complex binding	3.365e-12	68	924
6	GO:0001968	fibronectin binding	4.34e-12	14	30
7	GO:0050839	cell adhesion molecule binding	7.337e-12	28	174
8	GO:0019838	growth factor binding	7.085e-11	23	123
9	GO:0048407	platelet-derived growth factor binding	8.941e-10	9	12
10	GO:0050840	extracellular matrix binding	1.07e-09	15	50
11	GO:0005539	glycosaminoglycan binding	2.209e-09	27	202
12	GO:0008201	heparin binding	3.398e-08	22	149
13	GO:0008237	metallopeptidase activity	4.447e-08	24	181
14	GO:1901681	sulfur compound binding	2.293e-07	26	229
15	GO:0004222	metalloendopeptidase activity	1.372e-06	17	105
16	GO:0005102	receptor binding	2.667e-05	71	1405
17	GO:0043394	proteoglycan binding	2.757e-05	9	29
18	GO:0005044	scavenger receptor activity	0.000242	10	47
19	GO:0010576	metalloenzyme regulator activity	0.0006749	6	14
20	GO:0038024	cargo receptor activity	0.0009681	11	67
21	GO:0005198	structural molecule activity	0.001561	38	641
22	GO:0005161	platelet-derived growth factor receptor binding	0.001723	6	16
23	GO:0005520	insulin-like growth factor binding	0.002186	7	25
24	GO:0001948	glycoprotein binding	0.005483	12	95
25	GO:0043236	laminin binding	0.008283	7	30
26	GO:0048551	metalloenzyme inhibitor activity	0.01143	5	13
27	GO:0008191	metalloendopeptidase inhibitor activity	0.01143	5	13
28	GO:0005017	platelet-derived growth factor-activated receptor activity	0.01662	3	3
29	GO:0035939	microsatellite binding	0.01662	3	3
30	GO:0043912	D-lysine oxidase activity	0.01662	3	3

## Sheet: Biological process
rank	Id	Biological process terma	BonferoniP	overlap	nTerms
1	GO:0030198	extracellular matrix organization	1.092e-62	95	385
2	GO:0043062	extracellular structure organization	1.419e-62	95	386
3	GO:0022610	biological adhesion	5.105e-40	119	1077
4	GO:0007155	cell adhesion	1.153e-39	118	1067
5	GO:0022617	extracellular matrix disassembly	2.174e-30	41	126
6	GO:0044259	multicellular organismal macromolecule metabolic process	2.512e-25	37	126
7	GO:0044236	multicellular organismal metabolic process	1.52e-24	38	141
8	GO:0048468	cell development	2.906e-24	136	1970
9	GO:0032963	collagen metabolic process	1.05e-23	35	120
10	GO:0009887	organ morphogenesis	1.508e-23	88	920
11	GO:0001501	skeletal system development	2.639e-23	62	463
12	GO:0072358	cardiovascular system development	4.697e-22	85	905
13	GO:0072359	circulatory system development	4.697e-22	85	905
14	GO:0044243	multicellular organismal catabolic process	6.05e-22	29	82
15	GO:0030574	collagen catabolic process	7.153e-22	28	75
16	GO:0000904	cell morphogenesis involved in differentiation	4.274e-20	79	845
17	GO:0001503	ossification	9.123e-20	52	375
18	GO:0001944	vasculature development	1.465e-19	65	595
19	GO:0009888	tissue development	1.646e-19	120	1794
20	GO:0040011	locomotion	4.714e-19	108	1522
21	GO:0016477	cell migration	2.803e-18	87	1073
22	GO:0031589	cell-substrate adhesion	1.478e-17	42	267
23	GO:0006928	movement of cell or subcellular component	2.756e-17	112	1703
24	GO:0050793	regulation of developmental process	3.527e-17	120	1912
25	GO:0001568	blood vessel development	3.745e-17	60	566
26	GO:0032989	cellular component morphogenesis	7.682e-17	92	1242
27	GO:0000902	cell morphogenesis	1.723e-16	88	1165
28	GO:0030199	collagen fibril organization	3.002e-16	19	41
29	GO:2000026	regulation of multicellular organismal development	5.224e-16	100	1469
30	GO:0048870	cell motility	8.059e-16	87	1170
31	GO:0051674	localization of cell	8.059e-16	87	1170
32	GO:0061448	connective tissue development	3.56e-15	37	235
33	GO:0060348	bone development	4.183e-15	30	147
34	GO:0031175	neuron projection development	3.35e-14	71	878
35	GO:0048514	blood vessel morphogenesis	4.057e-14	52	500
36	GO:0022008	neurogenesis	1.382e-13	94	1441
37	GO:0048705	skeletal system morphogenesis	2.001e-13	34	221
38	GO:0048699	generation of neurons	3.401e-13	90	1362
39	GO:0048666	neuron development	3.841e-13	75	1009
40	GO:0030182	neuron differentiation	7.477e-13	85	1257
41	GO:0030030	cell projection organization	1.624e-12	82	1201
42	GO:0051216	cartilage development	2.459e-12	30	183
43	GO:0022411	cellular component disassembly	5.53e-12	47	466
44	GO:0045595	regulation of cell differentiation	6.868e-12	89	1405
45	GO:0030334	regulation of cell migration	7.97e-12	51	547
46	GO:2000145	regulation of cell motility	1.928e-11	52	579
47	GO:0001525	angiogenesis	2.632e-11	43	411
48	GO:0060349	bone morphogenesis	5.303e-11	21	91
49	GO:0022603	regulation of anatomical structure morphogenesis	2.331e-10	59	766
50	GO:0061564	axon development	6.405e-10	50	590
51	GO:0071560	cellular response to transforming growth factor beta stimulus	8.175e-10	30	226
52	GO:0071559	response to transforming growth factor beta	9.198e-10	30	227
53	GO:0040012	regulation of locomotion	9.969e-10	52	639
54	GO:0060284	regulation of cell development	1.214e-09	56	729
55	GO:0048646	anatomical structure formation involved in morphogenesis	1.446e-09	68	1009
56	GO:0045597	positive regulation of cell differentiation	1.876e-09	53	671
57	GO:0051270	regulation of cellular component movement	2.059e-09	52	651
58	GO:0060350	endochondral bone morphogenesis	2.909e-09	16	57
59	GO:0048812	neuron projection morphogenesis	3.117e-09	52	658
60	GO:0001649	osteoblast differentiation	3.311e-09	28	207
61	GO:0007178	transmembrane receptor protein serine/threonine kinase signaling pathway	4.998e-09	35	327
62	GO:0060485	mesenchyme development	6.009e-09	28	212
63	GO:0048667	cell morphogenesis involved in neuron differentiation	6.534e-09	51	649
64	GO:0048729	tissue morphogenesis	1.092e-08	47	572
65	GO:0051128	regulation of cellular component organization	1.099e-08	94	1733
66	GO:0051094	positive regulation of developmental process	1.197e-08	62	911
67	GO:0070848	response to growth factor	1.229e-08	52	682
68	GO:0007160	cell-matrix adhesion	1.465e-08	25	174
69	GO:0035295	tube development	1.693e-08	49	622
70	GO:0007507	heart development	1.731e-08	42	476
71	GO:0001837	epithelial to mesenchymal transition	1.852e-08	19	96
72	GO:0007409	axonogenesis	2.453e-08	46	564
73	GO:0007167	enzyme linked receptor protein signaling pathway	2.975e-08	66	1028
74	GO:0006935	chemotaxis	4.457e-08	50	661
75	GO:0042330	taxis	4.708e-08	50	662
76	GO:0071363	cellular response to growth factor stimulus	5.547e-08	50	665
77	GO:0061061	muscle structure development	6.19e-08	45	558
78	GO:0071495	cellular response to endogenous stimulus	8.052e-08	64	1002
79	GO:0030155	regulation of cell adhesion	1.064e-07	34	345
80	GO:0048762	mesenchymal cell differentiation	1.075e-07	23	160
81	GO:0014031	mesenchymal cell development	1.134e-07	22	146
82	GO:0042127	regulation of cell proliferation	1.994e-07	80	1439
83	GO:0098602	single organism cell adhesion	2.465e-07	35	375
84	GO:0071230	cellular response to amino acid stimulus	2.882e-07	13	45
85	GO:0008283	cell proliferation	5.339e-07	95	1887
86	GO:0071310	cellular response to organic substance	7.141e-07	93	1840
87	GO:0060429	epithelium development	8.149e-07	66	1110
88	GO:0016055	Wnt signaling pathway	8.503e-07	33	353
89	GO:0040007	growth	1.261e-06	59	944
90	GO:0048863	stem cell differentiation	1.724e-06	31	324
91	GO:0097485	neuron projection guidance	1.78e-06	34	383
92	GO:0007411	axon guidance	1.78e-06	34	383
93	GO:0009719	response to endogenous stimulus	1.793e-06	77	1424
94	GO:0030278	regulation of ossification	1.891e-06	23	184
95	GO:0009968	negative regulation of signal transduction	1.969e-06	58	930
96	GO:0060828	regulation of canonical Wnt signaling pathway	2.759e-06	21	156
97	GO:0030111	regulation of Wnt signaling pathway	3.084e-06	25	222
98	GO:0048858	cell projection morphogenesis	3.565e-06	53	821
99	GO:0043009	chordate embryonic development	3.608e-06	46	655
100	GO:0040017	positive regulation of locomotion	4.539e-06	31	337
101	GO:0010648	negative regulation of cell communication	5.477e-06	59	981
102	GO:0009792	embryo development ending in birth or egg hatching	5.583e-06	46	664
103	GO:2000147	positive regulation of cell motility	5.83e-06	30	321
104	GO:0007179	transforming growth factor beta receptor signaling pathway	6.012e-06	23	195
105	GO:0032990	cell part morphogenesis	7.957e-06	53	840
106	GO:0090090	negative regulation of canonical Wnt signaling pathway	8.13e-06	16	93
107	GO:0060070	canonical Wnt signaling pathway	9.768e-06	24	217
108	GO:0051272	positive regulation of cellular component movement	1.121e-05	30	330
109	GO:0023057	negative regulation of signaling	1.337e-05	58	979
110	GO:0030336	negative regulation of cell migration	1.508e-05	21	171
111	GO:0030335	positive regulation of cell migration	1.556e-05	29	315
112	GO:0051960	regulation of nervous system development	1.645e-05	44	640
113	GO:0002009	morphogenesis of an epithelium	1.654e-05	36	460
114	GO:0048585	negative regulation of response to stimulus	1.966e-05	63	1120
115	GO:0048864	stem cell development	2.134e-05	26	262
116	GO:2000146	negative regulation of cell motility	2.297e-05	21	175
117	GO:0071229	cellular response to acid chemical	2.543e-05	19	144
118	GO:0090092	regulation of transmembrane receptor protein serine/threonine kinase signaling pathway	2.872e-05	22	194
119	GO:0030178	negative regulation of Wnt signaling pathway	2.946e-05	18	130
120	GO:0023056	positive regulation of signaling	3.213e-05	65	1188
121	GO:0007517	muscle organ development	3.744e-05	31	368
122	GO:0010647	positive regulation of cell communication	4.168e-05	65	1196
123	GO:0051271	negative regulation of cellular component movement	4.217e-05	21	181
124	GO:0010717	regulation of epithelial to mesenchymal transition	4.258e-05	12	54
125	GO:0009967	positive regulation of signal transduction	4.517e-05	62	1118
126	GO:0002062	chondrocyte differentiation	4.801e-05	15	91
127	GO:0009611	response to wounding	4.847e-05	67	1255
128	GO:0007423	sensory organ development	5.109e-05	38	525
129	GO:0090287	regulation of cellular response to growth factor stimulus	5.134e-05	21	183
130	GO:0006024	glycosaminoglycan biosynthetic process	5.782e-05	16	106
131	GO:0009790	embryo development	6.358e-05	60	1075
132	GO:2000736	regulation of stem cell differentiation	6.523e-05	15	93
133	GO:0006023	aminoglycan biosynthetic process	6.639e-05	16	107
134	GO:0045664	regulation of neuron differentiation	7.815e-05	35	466
135	GO:0010718	positive regulation of epithelial to mesenchymal transition	9.132e-05	9	28
136	GO:0016049	cell growth	0.0001028	34	449
137	GO:0010810	regulation of cell-substrate adhesion	0.0001082	18	141
138	GO:0002063	chondrocyte development	0.0001218	8	21
139	GO:0003007	heart morphogenesis	0.0001219	23	228
140	GO:0001101	response to acid chemical	0.0001998	26	292
141	GO:0022604	regulation of cell morphogenesis	0.0002293	31	398
142	GO:0043200	response to amino acid	0.0002362	14	88
143	GO:0034329	cell junction assembly	0.0003457	21	204
144	GO:0001655	urogenital system development	0.0004062	27	323
145	GO:0051093	negative regulation of developmental process	0.000442	44	716
146	GO:0007229	integrin-mediated signaling pathway	0.0004521	15	107
147	GO:0050767	regulation of neurogenesis	0.0004851	38	572
148	GO:0070208	protein heterotrimerization	0.0005116	6	11
149	GO:0016337	single organismal cell-cell adhesion	0.0005219	27	327
150	GO:0045785	positive regulation of cell adhesion	0.0006201	19	175
151	GO:0040013	negative regulation of locomotion	0.0006679	21	212
152	GO:0048771	tissue remodeling	0.0007002	18	159
153	GO:0034330	cell junction organization	0.0007311	22	232
154	GO:0006029	proteoglycan metabolic process	0.0008306	14	97
155	GO:0050673	epithelial cell proliferation	0.0009596	26	316
156	GO:0030204	chondroitin sulfate metabolic process	0.001	11	58
157	GO:0031214	biomineral tissue development	0.001078	16	130
158	GO:0070167	regulation of biomineral tissue development	0.001251	12	72
159	GO:0042476	odontogenesis	0.001334	15	116
160	GO:0010975	regulation of neuron projection development	0.001383	26	322
161	GO:0030282	bone mineralization	0.001386	14	101
162	GO:0050654	chondroitin sulfate proteoglycan metabolic process	0.001437	11	60
163	GO:0072001	renal system development	0.00152	24	282
164	GO:0048584	positive regulation of response to stimulus	0.001772	74	1584
165	GO:0003416	endochondral bone growth	0.001828	7	20
166	GO:0001763	morphogenesis of a branching structure	0.001956	21	226
167	GO:0042060	wound healing	0.002104	41	681
168	GO:0001822	kidney development	0.002155	23	267
169	GO:0060560	developmental growth involved in morphogenesis	0.002287	18	172
170	GO:0010769	regulation of cell morphogenesis involved in differentiation	0.002302	23	268
171	GO:0008285	negative regulation of cell proliferation	0.002367	39	634
172	GO:0014812	muscle cell migration	0.002408	11	63
173	GO:0060317	cardiac epithelial to mesenchymal transition	0.002681	7	21
174	GO:0014909	smooth muscle cell migration	0.003738	10	53
175	GO:0030500	regulation of bone mineralization	0.003917	11	66
176	GO:0031344	regulation of cell projection organization	0.004366	29	409
177	GO:0048589	developmental growth	0.004371	26	342
178	GO:0051145	smooth muscle cell differentiation	0.004482	10	54
179	GO:0035239	tube morphogenesis	0.004603	27	365
180	GO:0048598	embryonic morphogenesis	0.004712	36	577
181	GO:0045667	regulation of osteoblast differentiation	0.005011	14	112
182	GO:0050651	dermatan sulfate proteoglycan biosynthetic process	0.005074	6	15
183	GO:0060562	epithelial tube morphogenesis	0.006389	26	349
184	GO:2000027	regulation of organ morphogenesis	0.006951	17	167
185	GO:0060537	muscle tissue development	0.00734	27	374
186	GO:0042692	muscle cell differentiation	0.00794	25	331
187	GO:0050655	dermatan sulfate proteoglycan metabolic process	0.007942	6	16
188	GO:0007044	cell-substrate junction assembly	0.008311	11	71
189	GO:0003206	cardiac chamber morphogenesis	0.008525	14	117
190	GO:0032835	glomerulus development	0.00891	10	58
191	GO:0050678	regulation of epithelial cell proliferation	0.009065	22	269
192	GO:0007162	negative regulation of cell adhesion	0.01046	14	119
193	GO:0001558	regulation of cell growth	0.01077	26	359
194	GO:0017015	regulation of transforming growth factor beta receptor signaling pathway	0.01079	13	103
195	GO:0072006	nephron development	0.01079	13	103
196	GO:0060346	bone trabecula formation	0.01093	5	10
197	GO:0006936	muscle contraction	0.01204	23	295
198	GO:0090288	negative regulation of cellular response to growth factor stimulus	0.01205	13	104
199	GO:0061138	morphogenesis of a branching epithelium	0.01265	19	213
200	GO:0060343	trabecula formation	0.01356	7	26

## Sheet: Cellular component
rank	Id	Biological process terma	BonferoniP	overlap	nTerms
1	GO:0031012	extracellular matrix	6.75e-76	108	422
2	GO:0005578	proteinaceous extracellular matrix	1.693e-66	93	348
3	GO:0044420	extracellular matrix component	9.942e-38	47	138
4	GO:0005604	basement membrane	5.382e-25	33	103
5	GO:0005615	extracellular space	8.93e-24	103	1284
6	GO:0005581	collagen trimer	1.089e-22	30	93
7	GO:0005788	endoplasmic reticulum lumen	3.739e-15	32	187
8	GO:0005583	fibrillar collagen trimer	2.931e-09	9	14
9	GO:0009986	cell surface	1.248e-05	44	700
10	GO:0005605	basal lamina	2.306e-05	8	23
11	GO:0098644	complex of collagen trimers	4.362e-05	6	11
12	GO:0030054	cell junction	6.12e-05	50	897
13	GO:0042383	sarcolemma	0.0004856	15	131
14	GO:0031252	cell leading edge	0.0006609	25	335
15	GO:0005925	focal adhesion	0.0007831	15	136
16	GO:0070161	anchoring junction	0.0008929	20	233
17	GO:0043256	laminin complex	0.0009514	5	10
18	GO:0043202	lysosomal lumen	0.001001	11	74
19	GO:0005912	adherens junction	0.001115	19	216
20	GO:0005924	cell-substrate adherens junction	0.001349	15	142
21	GO:0005775	vacuolar lumen	0.001701	11	78
22	GO:0030055	cell-substrate junction	0.002888	15	151
23	GO:0005606	laminin-1 complex	0.005498	4	7
24	GO:0005588	collagen type V trimer	0.006805	3	3
25	GO:0071953	elastic fiber	0.006805	3	3
26	GO:0098647	collagen beaded filament	0.006805	3	3
27	GO:0005589	collagen type VI trimer	0.006805	3	3
28	GO:0031091	platelet alpha granule	0.008812	9	61
29	GO:0031093	platelet alpha granule lumen	0.01017	8	48
30	GO:0031256	leading edge membrane	0.01629	13	135
31	GO:0031983	vesicle lumen	0.01703	10	82
32	GO:0001527	microfibril	0.01901	4	9
33	GO:0044432	endoplasmic reticulum part	0.02294	47	1020
34	GO:0005796	Golgi lumen	0.03138	10	88
